# Supplementary material
Source: publisher figshare collection journal article supplement (https://acs.figshare.com/ndownloader/files/7812637)
Supplement: Supplementary file 1 [file 7812637]

## Sheet: Sheet1
Name	Property	PropertyType	BinID	BinValue	FeatureCount	FeatureNumSamples	SubsetCount	SubsetNumSamples	NormalizedProbability	BinMinimumValue	BinMaximumValue
MMV_Model4	FCFP_6	SciTegic.value.IntegerFingerprintValue	G1	-1107299431	115	16696426	92	92	3.85628664100038
MMV_Model4	FCFP_6	SciTegic.value.IntegerFingerprintValue	G2	611514920	126	16696426	91	91	3.79953327649338
MMV_Model4	FCFP_6	SciTegic.value.IntegerFingerprintValue	G3	-1835889671	71	16696426	62	62	3.67514652921438
MMV_Model4	FCFP_6	SciTegic.value.IntegerFingerprintValue	G4	-775789281	70	16696426	61	61	3.66442402193462
MMV_Model4	FCFP_6	SciTegic.value.IntegerFingerprintValue	G5	1980158865	399	16696426	160	160	3.61037201815588
MMV_Model4	FCFP_6	SciTegic.value.IntegerFingerprintValue	G6	-1124372902	160	16696426	84	84	3.59042850724678
MMV_Model4	FCFP_6	SciTegic.value.IntegerFingerprintValue	G7	-1289177526	167	16696426	84	84	3.56564603074047
MMV_Model4	FCFP_6	SciTegic.value.IntegerFingerprintValue	G8	-1124254043	115	16696426	66	66	3.52837976723809
MMV_Model4	FCFP_6	SciTegic.value.IntegerFingerprintValue	G9	-1772807338	385	16696426	132	132	3.44671725162693
MMV_Model4	FCFP_6	SciTegic.value.IntegerFingerprintValue	G10	-1597864519	266	16696426	100	100	3.44083868351113
MMV_Model4	FCFP_6	SciTegic.value.IntegerFingerprintValue	G11	-200702388	499	16696426	161	161	3.44004205842112
MMV_Model4	FCFP_6	SciTegic.value.IntegerFingerprintValue	G12	-434839819	336	16696426	105	105	3.32209202782635
MMV_Model4	FCFP_6	SciTegic.value.IntegerFingerprintValue	G13	1246597680	109	16696426	51	51	3.30090949049552
MMV_Model4	FCFP_6	SciTegic.value.IntegerFingerprintValue	G14	-832330980	112	16696426	51	51	3.28783581972064
MMV_Model4	FCFP_6	SciTegic.value.IntegerFingerprintValue	G15	-1761370329	419	16696426	116	116	3.25325626792751
MMV_Model4	FCFP_6	SciTegic.value.IntegerFingerprintValue	G16	1424812700	53	16696426	36	36	3.24247467858768
MMV_Model4	FCFP_6	SciTegic.value.IntegerFingerprintValue	G17	-1108902211	53	16696426	36	36	3.24247467858768
MMV_Model4	FCFP_6	SciTegic.value.IntegerFingerprintValue	G18	1596678484	53	16696426	36	36	3.24247467858768
MMV_Model4	FCFP_6	SciTegic.value.IntegerFingerprintValue	G19	-1987791153	54	16696426	36	36	3.23667662323539
MMV_Model4	FCFP_6	SciTegic.value.IntegerFingerprintValue	G20	-445290595	54	16696426	36	36	3.23667662323539
MMV_Model4	FCFP_6	SciTegic.value.IntegerFingerprintValue	G21	2054957794	51	16696426	35	35	3.22677365259557
MMV_Model4	FCFP_6	SciTegic.value.IntegerFingerprintValue	G22	-640143667	273	16696426	81	81	3.21441761442684
MMV_Model4	FCFP_6	SciTegic.value.IntegerFingerprintValue	G23	726047712	281	16696426	82	82	3.20633484423854
MMV_Model4	FCFP_6	SciTegic.value.IntegerFingerprintValue	G24	-524478994	47	16696426	33	33	3.19342984228555
MMV_Model4	FCFP_6	SciTegic.value.IntegerFingerprintValue	G25	1463860020	222	16696426	68	68	3.18119487854796
MMV_Model4	FCFP_6	SciTegic.value.IntegerFingerprintValue	G26	793887856	222	16696426	68	68	3.18119487854796
MMV_Model4	FCFP_6	SciTegic.value.IntegerFingerprintValue	G27	-349162277	51	16696426	33	33	3.16961523875562
MMV_Model4	FCFP_6	SciTegic.value.IntegerFingerprintValue	G28	629734023	81	16696426	39	39	3.1695906202519
MMV_Model4	FCFP_6	SciTegic.value.IntegerFingerprintValue	G29	505881569	37	16696426	30	30	3.16319907773443
MMV_Model4	FCFP_6	SciTegic.value.IntegerFingerprintValue	G30	980765243	229	16696426	68	68	3.16087323034825
MMV_Model4	FCFP_6	SciTegic.value.IntegerFingerprintValue	G31	735635514	84	16696426	39	39	3.15469994613756
MMV_Model4	FCFP_6	SciTegic.value.IntegerFingerprintValue	G32	-665570233	49	16696426	32	32	3.1515986871284
MMV_Model4	FCFP_6	SciTegic.value.IntegerFingerprintValue	G33	-860343707	44	16696426	31	31	3.15104590153666
MMV_Model4	FCFP_6	SciTegic.value.IntegerFingerprintValue	G34	1667652882	56	16696426	33	33	3.14062301259684
MMV_Model4	FCFP_6	SciTegic.value.IntegerFingerprintValue	G35	38281462	56	16696426	33	33	3.14062301259684
MMV_Model4	FCFP_6	SciTegic.value.IntegerFingerprintValue	G36	-1098950217	56	16696426	33	33	3.14062301259684
MMV_Model4	FCFP_6	SciTegic.value.IntegerFingerprintValue	G37	135882342	118	16696426	45	45	3.13958800930633
MMV_Model4	FCFP_6	SciTegic.value.IntegerFingerprintValue	G38	-807883154	47	16696426	31	31	3.13280522046912
MMV_Model4	FCFP_6	SciTegic.value.IntegerFingerprintValue	G39	929543639	43	16696426	30	30	3.12545212543228
MMV_Model4	FCFP_6	SciTegic.value.IntegerFingerprintValue	G40	618316578	59	16696426	33	33	3.1236227491195
MMV_Model4	FCFP_6	SciTegic.value.IntegerFingerprintValue	G41	-1195630563	176	16696426	55	55	3.11735994335131
MMV_Model4	FCFP_6	SciTegic.value.IntegerFingerprintValue	G42	-248625343	76	16696426	36	36	3.11695046377639
MMV_Model4	FCFP_6	SciTegic.value.IntegerFingerprintValue	G43	-952602655	77	16696426	36	36	3.11183463310656
MMV_Model4	FCFP_6	SciTegic.value.IntegerFingerprintValue	G44	-1457997836	250	16696426	66	66	3.0728606183967
MMV_Model4	FCFP_6	SciTegic.value.IntegerFingerprintValue	G45	-406340195	262	16696426	68	68	3.0702693912086
MMV_Model4	FCFP_6	SciTegic.value.IntegerFingerprintValue	G46	414371600	450	16696426	102	102	3.06978662223876
MMV_Model4	FCFP_6	SciTegic.value.IntegerFingerprintValue	G47	2009823628	167	16696426	50	50	3.05482040697448
MMV_Model4	FCFP_6	SciTegic.value.IntegerFingerprintValue	G48	-1891550213	47	16696426	27	27	2.9992738278446
MMV_Model4	FCFP_6	SciTegic.value.IntegerFingerprintValue	G49	-148982032	84	16696426	33	33	2.99218101663978
MMV_Model4	FCFP_6	SciTegic.value.IntegerFingerprintValue	G50	298943918	192	16696426	51	51	2.99042954981892
MMV_Model4	FCFP_6	SciTegic.value.IntegerFingerprintValue	G51	1931741378	217	16696426	55	55	2.98721259949653
MMV_Model4	FCFP_6	SciTegic.value.IntegerFingerprintValue	G52	212796994	217	16696426	55	55	2.98721259949653
MMV_Model4	FCFP_6	SciTegic.value.IntegerFingerprintValue	G53	307657422	243	16696426	59	59	2.98166645545023
MMV_Model4	FCFP_6	SciTegic.value.IntegerFingerprintValue	G54	-1238187520	54	16696426	27	27	2.95796322076637
MMV_Model4	FCFP_6	SciTegic.value.IntegerFingerprintValue	G55	2119120384	54	16696426	27	27	2.95796322076637
MMV_Model4	FCFP_6	SciTegic.value.IntegerFingerprintValue	G56	-1445504893	31	16696426	23	23	2.94649357106464
MMV_Model4	FCFP_6	SciTegic.value.IntegerFingerprintValue	G57	-770873309	34	16696426	23	23	2.92668729646466
MMV_Model4	FCFP_6	SciTegic.value.IntegerFingerprintValue	G58	-1986969407	23	16696426	21	21	2.91430091022113
MMV_Model4	FCFP_6	SciTegic.value.IntegerFingerprintValue	G59	-1647926933	107	16696426	34	34	2.91382554599843
MMV_Model4	FCFP_6	SciTegic.value.IntegerFingerprintValue	G60	-1461971840	89	16696426	31	31	2.90722099029353
MMV_Model4	FCFP_6	SciTegic.value.IntegerFingerprintValue	G61	52619797	32	16696426	22	22	2.89728818205487
MMV_Model4	FCFP_6	SciTegic.value.IntegerFingerprintValue	G62	-834215848	73	16696426	28	28	2.8888348032923
MMV_Model4	FCFP_6	SciTegic.value.IntegerFingerprintValue	G63	1024167394	325	16696426	66	66	2.88781992869705
MMV_Model4	FCFP_6	SciTegic.value.IntegerFingerprintValue	G64	-406036863	27	16696426	21	21	2.88651596271791
MMV_Model4	FCFP_6	SciTegic.value.IntegerFingerprintValue	G65	-692310964	87	16696426	30	30	2.88513550519165
MMV_Model4	FCFP_6	SciTegic.value.IntegerFingerprintValue	G66	196140565	363	16696426	71	71	2.87766892296399
MMV_Model4	FCFP_6	SciTegic.value.IntegerFingerprintValue	G67	1926818357	77	16696426	28	28	2.86821255044881
MMV_Model4	FCFP_6	SciTegic.value.IntegerFingerprintValue	G68	-1681327177	77	16696426	28	28	2.86821255044881
MMV_Model4	FCFP_6	SciTegic.value.IntegerFingerprintValue	G69	2015541786	91	16696426	30	30	2.86590156346921
MMV_Model4	FCFP_6	SciTegic.value.IntegerFingerprintValue	G70	-621115947	168	16696426	41	41	2.85717364769643
MMV_Model4	FCFP_6	SciTegic.value.IntegerFingerprintValue	G71	213217899	292	16696426	59	59	2.85470826457743
MMV_Model4	FCFP_6	SciTegic.value.IntegerFingerprintValue	G72	1122108538	162	16696426	40	40	2.85420571821698
MMV_Model4	FCFP_6	SciTegic.value.IntegerFingerprintValue	G73	-2094692658	153	16696426	38	38	2.83675118590042
MMV_Model4	FCFP_6	SciTegic.value.IntegerFingerprintValue	G74	1862363849	70	16696426	26	26	2.83312650289386
MMV_Model4	FCFP_6	SciTegic.value.IntegerFingerprintValue	G75	-1040044112	162	16696426	39	39	2.8295131056266
MMV_Model4	FCFP_6	SciTegic.value.IntegerFingerprintValue	G76	377388438	22	16696426	19	19	2.82605929121879
MMV_Model4	FCFP_6	SciTegic.value.IntegerFingerprintValue	G77	682548386	186	16696426	42	42	2.81986884725516
MMV_Model4	FCFP_6	SciTegic.value.IntegerFingerprintValue	G78	-1977001922	89	16696426	28	28	2.80878091748027
MMV_Model4	FCFP_6	SciTegic.value.IntegerFingerprintValue	G79	350072712	365	16696426	66	66	2.80155439149771
MMV_Model4	FCFP_6	SciTegic.value.IntegerFingerprintValue	G80	1201278799	250	16696426	50	50	2.79999363173006
MMV_Model4	FCFP_6	SciTegic.value.IntegerFingerprintValue	G81	-1295863743	221	16696426	45	45	2.77866687074638
MMV_Model4	FCFP_6	SciTegic.value.IntegerFingerprintValue	G82	1951873529	66	16696426	24	24	2.77755984360503
MMV_Model4	FCFP_6	SciTegic.value.IntegerFingerprintValue	G83	1825083173	23	16696426	18	18	2.76769743602925
MMV_Model4	FCFP_6	SciTegic.value.IntegerFingerprintValue	G84	-89443367	38	16696426	20	20	2.76734337365666
MMV_Model4	FCFP_6	SciTegic.value.IntegerFingerprintValue	G85	-2083973249	1257	16696426	183	183	2.76690905239018
MMV_Model4	FCFP_6	SciTegic.value.IntegerFingerprintValue	G86	-821866081	68	16696426	24	24	2.7668054388257
MMV_Model4	FCFP_6	SciTegic.value.IntegerFingerprintValue	G87	203916048	166	16696426	37	37	2.76408390681043
MMV_Model4	FCFP_6	SciTegic.value.IntegerFingerprintValue	G88	2082878527	129	16696426	32	32	2.76208034774481
MMV_Model4	FCFP_6	SciTegic.value.IntegerFingerprintValue	G89	24	696	16696426	107	107	2.75786638287126
MMV_Model4	FCFP_6	SciTegic.value.IntegerFingerprintValue	G90	2110738711	238	16696426	46	46	2.75137900437909
MMV_Model4	FCFP_6	SciTegic.value.IntegerFingerprintValue	G91	1395989160	18	16696426	17	17	2.74948351788951
MMV_Model4	FCFP_6	SciTegic.value.IntegerFingerprintValue	G92	995879035	18	16696426	17	17	2.74948351788951
MMV_Model4	FCFP_6	SciTegic.value.IntegerFingerprintValue	G93	1617208710	18	16696426	17	17	2.74948351788951
MMV_Model4	FCFP_6	SciTegic.value.IntegerFingerprintValue	G94	454401778	18	16696426	17	17	2.74948351788951
MMV_Model4	FCFP_6	SciTegic.value.IntegerFingerprintValue	G95	-150573739	292	16696426	53	53	2.7493477489196
MMV_Model4	FCFP_6	SciTegic.value.IntegerFingerprintValue	G96	-1051886409	178	16696426	38	38	2.74881247942017
MMV_Model4	FCFP_6	SciTegic.value.IntegerFingerprintValue	G97	-1909558482	239	16696426	46	46	2.74858158146693
MMV_Model4	FCFP_6	SciTegic.value.IntegerFingerprintValue	G98	-728488975	210	16696426	42	42	2.74411620031163
MMV_Model4	FCFP_6	SciTegic.value.IntegerFingerprintValue	G99	-1017270618	242	16696426	46	46	2.74023596191793
MMV_Model4	FCFP_6	SciTegic.value.IntegerFingerprintValue	G100	811225536	120	16696426	30	30	2.73652942138848
MMV_Model4	FCFP_6	SciTegic.value.IntegerFingerprintValue	G101	-1111837258	120	16696426	30	30	2.73652942138848
MMV_Model4	FCFP_6	SciTegic.value.IntegerFingerprintValue	G102	-329389903	120	16696426	30	30	2.73652942138848
MMV_Model4	FCFP_6	SciTegic.value.IntegerFingerprintValue	G103	1276430953	175	16696426	37	37	2.73299032302452
MMV_Model4	FCFP_6	SciTegic.value.IntegerFingerprintValue	G104	-1068880134	99	16696426	27	27	2.7267264615308
MMV_Model4	FCFP_6	SciTegic.value.IntegerFingerprintValue	G105	-846825408	489	16696426	77	77	2.7254688678436
MMV_Model4	FCFP_6	SciTegic.value.IntegerFingerprintValue	G106	-370896770	76	16696426	24	24	2.72490837600037
MMV_Model4	FCFP_6	SciTegic.value.IntegerFingerprintValue	G107	1137016375	170	16696426	36	36	2.72347679696685
MMV_Model4	FCFP_6	SciTegic.value.IntegerFingerprintValue	G108	-954729548	124	16696426	30	30	2.71992960839496
MMV_Model4	FCFP_6	SciTegic.value.IntegerFingerprintValue	G109	715769664	54	16696426	21	21	2.71680116394948
MMV_Model4	FCFP_6	SciTegic.value.IntegerFingerprintValue	G110	1245250830	125	16696426	30	30	2.71582235589093
MMV_Model4	FCFP_6	SciTegic.value.IntegerFingerprintValue	G111	1744132810	70	16696426	23	23	2.71534346723747
MMV_Model4	FCFP_6	SciTegic.value.IntegerFingerprintValue	G112	-564212907	133	16696426	31	31	2.71530656202698
MMV_Model4	FCFP_6	SciTegic.value.IntegerFingerprintValue	G113	230861698	433	16696426	69	69	2.71388677389256
MMV_Model4	FCFP_6	SciTegic.value.IntegerFingerprintValue	G114	-598937885	181	16696426	37	37	2.71278571779159
MMV_Model4	FCFP_6	SciTegic.value.IntegerFingerprintValue	G115	-1538894287	126	16696426	30	30	2.71173190392948
MMV_Model4	FCFP_6	SciTegic.value.IntegerFingerprintValue	G116	-1676330777	176	16696426	36	36	2.70292616526039
MMV_Model4	FCFP_6	SciTegic.value.IntegerFingerprintValue	G117	-1374907068	1428	16696426	193	193	2.70269238072752
MMV_Model4	FCFP_6	SciTegic.value.IntegerFingerprintValue	G118	1914565584	456	16696426	71	71	2.70123363473628
MMV_Model4	FCFP_6	SciTegic.value.IntegerFingerprintValue	G119	-974124099	58	16696426	21	21	2.6939393811611
MMV_Model4	FCFP_6	SciTegic.value.IntegerFingerprintValue	G120	423888419	155	16696426	33	33	2.69222327559406
MMV_Model4	FCFP_6	SciTegic.value.IntegerFingerprintValue	G121	-737307399	83	16696426	24	24	2.68963527893477
MMV_Model4	FCFP_6	SciTegic.value.IntegerFingerprintValue	G122	809497993	205	16696426	39	39	2.68711108234326
MMV_Model4	FCFP_6	SciTegic.value.IntegerFingerprintValue	G123	1344446446	60	16696426	21	21	2.68270154662733
MMV_Model4	FCFP_6	SciTegic.value.IntegerFingerprintValue	G124	2081458023	201	16696426	38	38	2.67421687071373
MMV_Model4	FCFP_6	SciTegic.value.IntegerFingerprintValue	G125	-552269074	218	16696426	40	40	2.67246095868815
MMV_Model4	FCFP_6	SciTegic.value.IntegerFingerprintValue	G126	876457212	122	16696426	28	28	2.66150369656458
MMV_Model4	FCFP_6	SciTegic.value.IntegerFingerprintValue	G127	1108637257	272	16696426	46	46	2.66040043069875
MMV_Model4	FCFP_6	SciTegic.value.IntegerFingerprintValue	G128	1478747693	48	16696426	19	19	2.65679456069139
MMV_Model4	FCFP_6	SciTegic.value.IntegerFingerprintValue	G129	547873177	140	16696426	30	30	2.65615589726961
MMV_Model4	FCFP_6	SciTegic.value.IntegerFingerprintValue	G130	242317701	57	16696426	20	20	2.65308599870729
MMV_Model4	FCFP_6	SciTegic.value.IntegerFingerprintValue	G131	1580705880	57	16696426	20	20	2.65308599870729
MMV_Model4	FCFP_6	SciTegic.value.IntegerFingerprintValue	G132	-986211136	141	16696426	30	30	2.65230191364214
MMV_Model4	FCFP_6	SciTegic.value.IntegerFingerprintValue	G133	1135326061	133	16696426	29	29	2.65076804088941
MMV_Model4	FCFP_6	SciTegic.value.IntegerFingerprintValue	G134	1618392993	278	16696426	46	46	2.6451706316261
MMV_Model4	FCFP_6	SciTegic.value.IntegerFingerprintValue	G135	-958281618	51	16696426	19	19	2.63898698769345
MMV_Model4	FCFP_6	SciTegic.value.IntegerFingerprintValue	G136	1432860970	136	16696426	29	29	2.63893228073044
MMV_Model4	FCFP_6	SciTegic.value.IntegerFingerprintValue	G137	1492526281	196	16696426	36	36	2.63732287808471
MMV_Model4	FCFP_6	SciTegic.value.IntegerFingerprintValue	G138	-1416216504	145	16696426	30	30	2.63703281565432
MMV_Model4	FCFP_6	SciTegic.value.IntegerFingerprintValue	G139	-782656850	274	16696426	45	45	2.63379181047823
MMV_Model4	FCFP_6	SciTegic.value.IntegerFingerprintValue	G140	-474664664	35	16696426	17	17	2.63248935880501
MMV_Model4	FCFP_6	SciTegic.value.IntegerFingerprintValue	G141	-765227358	210	16696426	37	37	2.62050224434446
MMV_Model4	FCFP_6	SciTegic.value.IntegerFingerprintValue	G142	483493837	81	16696426	22	22	2.61620538206711
MMV_Model4	FCFP_6	SciTegic.value.IntegerFingerprintValue	G143	562090283	119	16696426	26	26	2.60257245165677
MMV_Model4	FCFP_6	SciTegic.value.IntegerFingerprintValue	G144	1819889490	40	16696426	17	17	2.60053206151604
MMV_Model4	FCFP_6	SciTegic.value.IntegerFingerprintValue	G145	1427534128	245	16696426	40	40	2.59538388066692
MMV_Model4	FCFP_6	SciTegic.value.IntegerFingerprintValue	G146	-1472001734	148	16696426	29	29	2.5929422501554
MMV_Model4	FCFP_6	SciTegic.value.IntegerFingerprintValue	G147	-1458901884	193	16696426	34	34	2.59132332957054
MMV_Model4	FCFP_6	SciTegic.value.IntegerFingerprintValue	G148	1540136253	69	16696426	20	20	2.58711791207469
MMV_Model4	FCFP_6	SciTegic.value.IntegerFingerprintValue	G149	1155314152	61	16696426	19	19	2.58181945581849
MMV_Model4	FCFP_6	SciTegic.value.IntegerFingerprintValue	G150	-1334040887	124	16696426	26	26	2.58177926991414
MMV_Model4	FCFP_6	SciTegic.value.IntegerFingerprintValue	G151	359269024	124	16696426	26	26	2.58177926991414
MMV_Model4	FCFP_6	SciTegic.value.IntegerFingerprintValue	G152	464814280	98	16696426	23	23	2.57717408073601
MMV_Model4	FCFP_6	SciTegic.value.IntegerFingerprintValue	G153	2099271462	460	16696426	63	63	2.57651782711663
MMV_Model4	FCFP_6	SciTegic.value.IntegerFingerprintValue	G154	-928768279	767	16696426	96	96	2.56691455383019
MMV_Model4	FCFP_6	SciTegic.value.IntegerFingerprintValue	G155	-1907472970	128	16696426	26	26	2.5654505172833
MMV_Model4	FCFP_6	SciTegic.value.IntegerFingerprintValue	G156	2003828904	55	16696426	18	18	2.56443305815154
MMV_Model4	FCFP_6	SciTegic.value.IntegerFingerprintValue	G157	-345967077	101	16696426	23	23	2.56344213465862
MMV_Model4	FCFP_6	SciTegic.value.IntegerFingerprintValue	G158	723420941	93	16696426	22	22	2.55792857757032
MMV_Model4	FCFP_6	SciTegic.value.IntegerFingerprintValue	G159	-722246088	94	16696426	22	22	2.55322206866599
MMV_Model4	FCFP_6	SciTegic.value.IntegerFingerprintValue	G160	941217651	449	16696426	60	60	2.54769059990814
MMV_Model4	FCFP_6	SciTegic.value.IntegerFingerprintValue	G161	493126856	105	16696426	23	23	2.54542136452591
MMV_Model4	FCFP_6	SciTegic.value.IntegerFingerprintValue	G162	247717152	96	16696426	22	22	2.54387498775784
MMV_Model4	FCFP_6	SciTegic.value.IntegerFingerprintValue	G163	-1733702760	443	16696426	59	59	2.54178139115873
MMV_Model4	FCFP_6	SciTegic.value.IntegerFingerprintValue	G164	257759553	1216	16696426	141	141	2.53805042269497
MMV_Model4	FCFP_6	SciTegic.value.IntegerFingerprintValue	G165	1355550437	41	16696426	16	16	2.53710293790087
MMV_Model4	FCFP_6	SciTegic.value.IntegerFingerprintValue	G166	594945773	41	16696426	16	16	2.53710293790087
MMV_Model4	FCFP_6	SciTegic.value.IntegerFingerprintValue	G167	-687289284	269	16696426	40	40	2.53152766774783
MMV_Model4	FCFP_6	SciTegic.value.IntegerFingerprintValue	G168	754525817	42	16696426	16	16	2.53087130501415
MMV_Model4	FCFP_6	SciTegic.value.IntegerFingerprintValue	G169	-48264962	42	16696426	16	16	2.53087130501415
MMV_Model4	FCFP_6	SciTegic.value.IntegerFingerprintValue	G170	-765127160	42	16696426	16	16	2.53087130501415
MMV_Model4	FCFP_6	SciTegic.value.IntegerFingerprintValue	G171	1762267022	279	16696426	41	41	2.53017674703486
MMV_Model4	FCFP_6	SciTegic.value.IntegerFingerprintValue	G172	-970324193	34	16696426	15	15	2.5212221883565
MMV_Model4	FCFP_6	SciTegic.value.IntegerFingerprintValue	G173	-1687795793	25	16696426	14	14	2.51731968690389
MMV_Model4	FCFP_6	SciTegic.value.IntegerFingerprintValue	G174	-1639595062	25	16696426	14	14	2.51731968690389
MMV_Model4	FCFP_6	SciTegic.value.IntegerFingerprintValue	G175	-1736654880	25	16696426	14	14	2.51731968690389
MMV_Model4	FCFP_6	SciTegic.value.IntegerFingerprintValue	G176	-828783921	25	16696426	14	14	2.51731968690389
MMV_Model4	FCFP_6	SciTegic.value.IntegerFingerprintValue	G177	208851713	83	16696426	20	20	2.51528189178999
MMV_Model4	FCFP_6	SciTegic.value.IntegerFingerprintValue	G178	-120672487	35	16696426	15	15	2.51470632314862
MMV_Model4	FCFP_6	SciTegic.value.IntegerFingerprintValue	G179	-1276760126	141	16696426	26	26	2.51415157516132
MMV_Model4	FCFP_6	SciTegic.value.IntegerFingerprintValue	G180	-2106499867	16	16696426	13	13	2.51287825429589
MMV_Model4	FCFP_6	SciTegic.value.IntegerFingerprintValue	G181	220260384	16	16696426	13	13	2.51287825429589
MMV_Model4	FCFP_6	SciTegic.value.IntegerFingerprintValue	G182	1485080421	16	16696426	13	13	2.51287825429589
MMV_Model4	FCFP_6	SciTegic.value.IntegerFingerprintValue	G183	1390630565	1263	16696426	142	142	2.51046685118564
MMV_Model4	FCFP_6	SciTegic.value.IntegerFingerprintValue	G184	-1744578802	26	16696426	14	14	2.51039790775077
MMV_Model4	FCFP_6	SciTegic.value.IntegerFingerprintValue	G185	1972201109	105	16696426	22	22	2.50286175010711
MMV_Model4	FCFP_6	SciTegic.value.IntegerFingerprintValue	G186	812782594	144	16696426	26	26	2.50267794996959
MMV_Model4	FCFP_6	SciTegic.value.IntegerFingerprintValue	G187	-150332552	106	16696426	22	22	2.49840684618228
MMV_Model4	FCFP_6	SciTegic.value.IntegerFingerprintValue	G188	1070323410	341	16696426	46	46	2.49787079842209
MMV_Model4	FCFP_6	SciTegic.value.IntegerFingerprintValue	G189	1701040695	29	16696426	14	14	2.48991547584113
MMV_Model4	FCFP_6	SciTegic.value.IntegerFingerprintValue	G190	-2062686016	523	16696426	64	64	2.48873145928766
MMV_Model4	FCFP_6	SciTegic.value.IntegerFingerprintValue	G191	-1196962537	20	16696426	13	13	2.48367315184586
MMV_Model4	FCFP_6	SciTegic.value.IntegerFingerprintValue	G192	-1778267976	60	16696426	17	17	2.48203085116518
MMV_Model4	FCFP_6	SciTegic.value.IntegerFingerprintValue	G193	720892651	80	16696426	19	19	2.48145668253654
MMV_Model4	FCFP_6	SciTegic.value.IntegerFingerprintValue	G194	724472406	171	16696426	28	28	2.47640014655205
MMV_Model4	FCFP_6	SciTegic.value.IntegerFingerprintValue	G195	-656492378	1952	16696426	205	205	2.47099181693977
MMV_Model4	FCFP_6	SciTegic.value.IntegerFingerprintValue	G196	-676042518	434	16696426	54	54	2.47091467043781
MMV_Model4	FCFP_6	SciTegic.value.IntegerFingerprintValue	G197	-1015640496	22	16696426	13	13	2.46938434728006
MMV_Model4	FCFP_6	SciTegic.value.IntegerFingerprintValue	G198	152395881	12	16696426	12	12	2.46885404839775
MMV_Model4	FCFP_6	SciTegic.value.IntegerFingerprintValue	G199	-258590457	12	16696426	12	12	2.46885404839775
MMV_Model4	FCFP_6	SciTegic.value.IntegerFingerprintValue	G200	303660633	12	16696426	12	12	2.46885404839775
MMV_Model4	FCFP_6	SciTegic.value.IntegerFingerprintValue	G201	-299799054	12	16696426	12	12	2.46885404839775
MMV_Model4	FCFP_6	SciTegic.value.IntegerFingerprintValue	G202	-874528568	12	16696426	12	12	2.46885404839775
MMV_Model4	FCFP_6	SciTegic.value.IntegerFingerprintValue	G203	1669054494	12	16696426	12	12	2.46885404839775
MMV_Model4	FCFP_6	SciTegic.value.IntegerFingerprintValue	G204	-1629357391	12	16696426	12	12	2.46885404839775
MMV_Model4	FCFP_6	SciTegic.value.IntegerFingerprintValue	G205	-1762606426	12	16696426	12	12	2.46885404839775
MMV_Model4	FCFP_6	SciTegic.value.IntegerFingerprintValue	G206	-1236141438	12	16696426	12	12	2.46885404839775
MMV_Model4	FCFP_6	SciTegic.value.IntegerFingerprintValue	G207	1813350264	12	16696426	12	12	2.46885404839775
MMV_Model4	FCFP_6	SciTegic.value.IntegerFingerprintValue	G208	136939001	13	16696426	12	12	2.4612478353961
MMV_Model4	FCFP_6	SciTegic.value.IntegerFingerprintValue	G209	1961252986	13	16696426	12	12	2.4612478353961
MMV_Model4	FCFP_6	SciTegic.value.IntegerFingerprintValue	G210	-1126894876	13	16696426	12	12	2.4612478353961
MMV_Model4	FCFP_6	SciTegic.value.IntegerFingerprintValue	G211	1355757254	86	16696426	19	19	2.45174742459183
MMV_Model4	FCFP_6	SciTegic.value.IntegerFingerprintValue	G212	470289641	283	16696426	38	38	2.44606799406208
MMV_Model4	FCFP_6	SciTegic.value.IntegerFingerprintValue	G213	1824900884	243	16696426	34	34	2.44266995471755
MMV_Model4	FCFP_6	SciTegic.value.IntegerFingerprintValue	G214	-1280488256	519	16696426	60	60	2.4314683463541
MMV_Model4	FCFP_6	SciTegic.value.IntegerFingerprintValue	G215	1573229331	17	16696426	12	12	2.43138865510161
MMV_Model4	FCFP_6	SciTegic.value.IntegerFingerprintValue	G216	-706928039	101	16696426	20	20	2.4299107420341
MMV_Model4	FCFP_6	SciTegic.value.IntegerFingerprintValue	G217	1927130675	28	16696426	13	13	2.42770357383694
MMV_Model4	FCFP_6	SciTegic.value.IntegerFingerprintValue	G218	1155580743	50	16696426	15	15	2.42174412966298
MMV_Model4	FCFP_6	SciTegic.value.IntegerFingerprintValue	G219	1937487302	40	16696426	14	14	2.41821050472209
MMV_Model4	FCFP_6	SciTegic.value.IntegerFingerprintValue	G220	1490928725	40	16696426	14	14	2.41821050472209
MMV_Model4	FCFP_6	SciTegic.value.IntegerFingerprintValue	G221	885884651	19	16696426	12	12	2.41678688227703
MMV_Model4	FCFP_6	SciTegic.value.IntegerFingerprintValue	G222	1163733330	19	16696426	12	12	2.41678688227703
MMV_Model4	FCFP_6	SciTegic.value.IntegerFingerprintValue	G223	-1840168561	41	16696426	14	14	2.41193979494686
MMV_Model4	FCFP_6	SciTegic.value.IntegerFingerprintValue	G224	64534794	20	16696426	12	12	2.40956517969214
MMV_Model4	FCFP_6	SciTegic.value.IntegerFingerprintValue	G225	-1918075737	107	16696426	20	20	2.40299992223244
MMV_Model4	FCFP_6	SciTegic.value.IntegerFingerprintValue	G226	331308279	64	16696426	16	16	2.4027686832926
MMV_Model4	FCFP_6	SciTegic.value.IntegerFingerprintValue	G227	-247368914	32	16696426	13	13	2.40085129574098
MMV_Model4	FCFP_6	SciTegic.value.IntegerFingerprintValue	G228	2134828381	291	16696426	37	37	2.40038608244029
MMV_Model4	FCFP_6	SciTegic.value.IntegerFingerprintValue	G229	328860554	401	16696426	47	47	2.39631488761871
MMV_Model4	FCFP_6	SciTegic.value.IntegerFingerprintValue	G230	1506787578	228	16696426	31	31	2.39538055941427
MMV_Model4	FCFP_6	SciTegic.value.IntegerFingerprintValue	G231	-2099715953	44	16696426	14	14	2.39336019983914
MMV_Model4	FCFP_6	SciTegic.value.IntegerFingerprintValue	G232	-1012800943	44	16696426	14	14	2.39336019983914
MMV_Model4	FCFP_6	SciTegic.value.IntegerFingerprintValue	G233	356551147	66	16696426	16	16	2.39189736279304
MMV_Model4	FCFP_6	SciTegic.value.IntegerFingerprintValue	G234	1551257511	2093	16696426	202	202	2.39045526730173
MMV_Model4	FCFP_6	SciTegic.value.IntegerFingerprintValue	G235	-758893606	121	16696426	21	21	2.38940881244975
MMV_Model4	FCFP_6	SciTegic.value.IntegerFingerprintValue	G236	-1976243550	121	16696426	21	21	2.38940881244975
MMV_Model4	FCFP_6	SciTegic.value.IntegerFingerprintValue	G237	-326158830	12	16696426	11	11	2.38881134072421
MMV_Model4	FCFP_6	SciTegic.value.IntegerFingerprintValue	G238	-2000949474	56	16696426	15	15	2.38685121022046
MMV_Model4	FCFP_6	SciTegic.value.IntegerFingerprintValue	G239	1239009462	56	16696426	15	15	2.38685121022046
MMV_Model4	FCFP_6	SciTegic.value.IntegerFingerprintValue	G240	-1728325536	46	16696426	14	14	2.38116285190003
MMV_Model4	FCFP_6	SciTegic.value.IntegerFingerprintValue	G241	-792963779	1699	16696426	164	164	2.37935758329847
MMV_Model4	FCFP_6	SciTegic.value.IntegerFingerprintValue	G242	1957795370	433	16696426	49	49	2.37741453727134
MMV_Model4	FCFP_6	SciTegic.value.IntegerFingerprintValue	G243	771193401	570	16696426	61	61	2.37082264286071
MMV_Model4	FCFP_6	SciTegic.value.IntegerFingerprintValue	G244	2084156073	15	16696426	11	11	2.36616409538419
MMV_Model4	FCFP_6	SciTegic.value.IntegerFingerprintValue	G245	1862149799	27	16696426	12	12	2.36042286682113
MMV_Model4	FCFP_6	SciTegic.value.IntegerFingerprintValue	G246	-1229684812	84	16696426	17	17	2.35619224991979
MMV_Model4	FCFP_6	SciTegic.value.IntegerFingerprintValue	G247	327611569	84	16696426	17	17	2.35619224991979
MMV_Model4	FCFP_6	SciTegic.value.IntegerFingerprintValue	G248	-499219524	17	16696426	11	11	2.35134594742807
MMV_Model4	FCFP_6	SciTegic.value.IntegerFingerprintValue	G249	-1871731683	74	16696426	16	16	2.34955674754941
MMV_Model4	FCFP_6	SciTegic.value.IntegerFingerprintValue	G250	-1778949328	63	16696426	15	15	2.34762436495774
MMV_Model4	FCFP_6	SciTegic.value.IntegerFingerprintValue	G251	-1227851200	915	16696426	89	89	2.33753563433926
MMV_Model4	FCFP_6	SciTegic.value.IntegerFingerprintValue	G252	2142660262	1530	16696426	142	142	2.33382626448738
MMV_Model4	FCFP_6	SciTegic.value.IntegerFingerprintValue	G253	-1428118135	31	16696426	12	12	2.33338909817823
MMV_Model4	FCFP_6	SciTegic.value.IntegerFingerprintValue	G254	88904199	182	16696426	25	25	2.32996799703138
MMV_Model4	FCFP_6	SciTegic.value.IntegerFingerprintValue	G255	-1852867017	90	16696426	17	17	2.32706003132327
MMV_Model4	FCFP_6	SciTegic.value.IntegerFingerprintValue	G256	-1588933968	90	16696426	17	17	2.32706003132327
MMV_Model4	FCFP_6	SciTegic.value.IntegerFingerprintValue	G257	-1792598584	102	16696426	18	18	2.32529155446833
MMV_Model4	FCFP_6	SciTegic.value.IntegerFingerprintValue	G258	1715199747	1115	16696426	105	105	2.32433453593579
MMV_Model4	FCFP_6	SciTegic.value.IntegerFingerprintValue	G259	1862622575	149	16696426	22	22	2.32350037241233
MMV_Model4	FCFP_6	SciTegic.value.IntegerFingerprintValue	G260	-485077127	417	16696426	45	45	2.32344832219999
MMV_Model4	FCFP_6	SciTegic.value.IntegerFingerprintValue	G261	-1999512948	91	16696426	17	17	2.32228611688023
MMV_Model4	FCFP_6	SciTegic.value.IntegerFingerprintValue	G262	554477730	243	16696426	30	30	2.32130909771328
MMV_Model4	FCFP_6	SciTegic.value.IntegerFingerprintValue	G263	1473581468	150	16696426	22	22	2.31977558632093
MMV_Model4	FCFP_6	SciTegic.value.IntegerFingerprintValue	G264	166205998	22	16696426	11	11	2.3152336674528
MMV_Model4	FCFP_6	SciTegic.value.IntegerFingerprintValue	G265	-295357170	69	16696426	15	15	2.31518419659105
MMV_Model4	FCFP_6	SciTegic.value.IntegerFingerprintValue	G266	748365018	317	16696426	36	36	2.31222869395956
MMV_Model4	FCFP_6	SciTegic.value.IntegerFingerprintValue	G267	-1760575942	259	16696426	31	31	2.30980455007026
MMV_Model4	FCFP_6	SciTegic.value.IntegerFingerprintValue	G268	-1320091478	11	16696426	10	10	2.3094644749241
MMV_Model4	FCFP_6	SciTegic.value.IntegerFingerprintValue	G269	-967982007	11	16696426	10	10	2.3094644749241
MMV_Model4	FCFP_6	SciTegic.value.IntegerFingerprintValue	G270	-1570979257	1135	16696426	105	105	2.30825665864586
MMV_Model4	FCFP_6	SciTegic.value.IntegerFingerprintValue	G271	355507659	47	16696426	13	13	2.30612664728465
MMV_Model4	FCFP_6	SciTegic.value.IntegerFingerprintValue	G272	-1778605810	723	16696426	70	70	2.30582203414145
MMV_Model4	FCFP_6	SciTegic.value.IntegerFingerprintValue	G273	-1148638497	345	16696426	38	38	2.3026262572646
MMV_Model4	FCFP_6	SciTegic.value.IntegerFingerprintValue	G274	1395912805	48	16696426	13	13	2.30011961675266
MMV_Model4	FCFP_6	SciTegic.value.IntegerFingerprintValue	G275	157933313	48	16696426	13	13	2.30011961675266
MMV_Model4	FCFP_6	SciTegic.value.IntegerFingerprintValue	G276	-1476906088	72	16696426	15	15	2.29935040034701
MMV_Model4	FCFP_6	SciTegic.value.IntegerFingerprintValue	G277	1705795517	25	16696426	11	11	2.29417613558968
MMV_Model4	FCFP_6	SciTegic.value.IntegerFingerprintValue	G278	-730311961	351	16696426	38	38	2.28977734722249
MMV_Model4	FCFP_6	SciTegic.value.IntegerFingerprintValue	G279	-1895196135	99	16696426	17	17	2.28489370925176
MMV_Model4	FCFP_6	SciTegic.value.IntegerFingerprintValue	G280	556514253	27	16696426	11	11	2.28038015914759
MMV_Model4	FCFP_6	SciTegic.value.IntegerFingerprintValue	G281	129388340	40	16696426	12	12	2.27510966108141
MMV_Model4	FCFP_6	SciTegic.value.IntegerFingerprintValue	G282	-1934068057	28	16696426	11	11	2.27355289400968
MMV_Model4	FCFP_6	SciTegic.value.IntegerFingerprintValue	G283	-1452814393	126	16696426	19	19	2.27347697299833
MMV_Model4	FCFP_6	SciTegic.value.IntegerFingerprintValue	G284	2081470844	65	16696426	14	14	2.27215510696039
MMV_Model4	FCFP_6	SciTegic.value.IntegerFingerprintValue	G285	1313952535	16	16696426	10	10	2.271716197479
MMV_Model4	FCFP_6	SciTegic.value.IntegerFingerprintValue	G286	2072101495	398	16696426	41	41	2.26856974337916
MMV_Model4	FCFP_6	SciTegic.value.IntegerFingerprintValue	G287	-1041478687	128	16696426	19	19	2.26534592483296
MMV_Model4	FCFP_6	SciTegic.value.IntegerFingerprintValue	G288	-860208307	128	16696426	19	19	2.26534592483296
MMV_Model4	FCFP_6	SciTegic.value.IntegerFingerprintValue	G289	2047715955	479	16696426	47	47	2.25654594738365
MMV_Model4	FCFP_6	SciTegic.value.IntegerFingerprintValue	G290	-881637396	31	16696426	11	11	2.25334639050469
MMV_Model4	FCFP_6	SciTegic.value.IntegerFingerprintValue	G291	1396155425	731	16696426	67	67	2.2531932151979
MMV_Model4	FCFP_6	SciTegic.value.IntegerFingerprintValue	G292	-730269264	994	16696426	88	88	2.25273612250177
MMV_Model4	FCFP_6	SciTegic.value.IntegerFingerprintValue	G293	2061204155	69	16696426	14	14	2.25064567545347
MMV_Model4	FCFP_6	SciTegic.value.IntegerFingerprintValue	G294	329866157	69	16696426	14	14	2.25064567545347
MMV_Model4	FCFP_6	SciTegic.value.IntegerFingerprintValue	G295	-429970550	483	16696426	47	47	2.24987894604387
MMV_Model4	FCFP_6	SciTegic.value.IntegerFingerprintValue	G296	-1697264126	19	16696426	10	10	2.24973279761387
MMV_Model4	FCFP_6	SciTegic.value.IntegerFingerprintValue	G297	106422123	57	16696426	13	13	2.24762089059913
MMV_Model4	FCFP_6	SciTegic.value.IntegerFingerprintValue	G298	2066991137	20	16696426	10	10	2.24251109502897
MMV_Model4	FCFP_6	SciTegic.value.IntegerFingerprintValue	G299	370924279	33	16696426	11	11	2.24009871622039
MMV_Model4	FCFP_6	SciTegic.value.IntegerFingerprintValue	G300	-1959657804	985	16696426	86	86	2.23812720019764
MMV_Model4	FCFP_6	SciTegic.value.IntegerFingerprintValue	G301	844158808	135	16696426	19	19	2.23739688151397
MMV_Model4	FCFP_6	SciTegic.value.IntegerFingerprintValue	G302	-1281506439	779	16696426	69	69	2.22724527891545
MMV_Model4	FCFP_6	SciTegic.value.IntegerFingerprintValue	G303	-1248584882	113	16696426	17	17	2.22264367728895
MMV_Model4	FCFP_6	SciTegic.value.IntegerFingerprintValue	G304	-327747567	113	16696426	17	17	2.22264367728895
MMV_Model4	FCFP_6	SciTegic.value.IntegerFingerprintValue	G305	1574051077	10	16696426	9	9	2.22187800506262
MMV_Model4	FCFP_6	SciTegic.value.IntegerFingerprintValue	G306	-2083557838	152	16696426	20	20	2.22139560140521
MMV_Model4	FCFP_6	SciTegic.value.IntegerFingerprintValue	G307	-102767672	114	16696426	17	17	2.21834207925659
MMV_Model4	FCFP_6	SciTegic.value.IntegerFingerprintValue	G308	2084036097	37	16696426	11	11	2.21411852303728
MMV_Model4	FCFP_6	SciTegic.value.IntegerFingerprintValue	G309	240170940	63	16696426	13	13	2.21409297233322
MMV_Model4	FCFP_6	SciTegic.value.IntegerFingerprintValue	G310	-1853355700	25	16696426	10	10	2.20716475860005
MMV_Model4	FCFP_6	SciTegic.value.IntegerFingerprintValue	G311	-1256111135	26	16696426	10	10	2.20024297944693
MMV_Model4	FCFP_6	SciTegic.value.IntegerFingerprintValue	G312	270431798	79	16696426	14	14	2.19881311221727
MMV_Model4	FCFP_6	SciTegic.value.IntegerFingerprintValue	G313	-1201076073	40	16696426	11	11	2.19506695340788
MMV_Model4	FCFP_6	SciTegic.value.IntegerFingerprintValue	G314	-238560726	27	16696426	10	10	2.19336878215796
MMV_Model4	FCFP_6	SciTegic.value.IntegerFingerprintValue	G315	2110517505	1024	16696426	85	85	2.19184907862795
MMV_Model4	FCFP_6	SciTegic.value.IntegerFingerprintValue	G316	-869760696	231	16696426	25	25	2.17913213095239
MMV_Model4	FCFP_6	SciTegic.value.IntegerFingerprintValue	G317	1824335515	84	16696426	14	14	2.17387069312583
MMV_Model4	FCFP_6	SciTegic.value.IntegerFingerprintValue	G318	-1987429185	166	16696426	20	20	2.17102018480747
MMV_Model4	FCFP_6	SciTegic.value.IntegerFingerprintValue	G319	-402897364	44	16696426	11	11	2.17021664852493
MMV_Model4	FCFP_6	SciTegic.value.IntegerFingerprintValue	G320	-1911235611	44	16696426	11	11	2.17021664852493
MMV_Model4	FCFP_6	SciTegic.value.IntegerFingerprintValue	G321	553532034	44	16696426	11	11	2.17021664852493
MMV_Model4	FCFP_6	SciTegic.value.IntegerFingerprintValue	G322	1898848138	44	16696426	11	11	2.17021664852493
MMV_Model4	FCFP_6	SciTegic.value.IntegerFingerprintValue	G323	215261277	44	16696426	11	11	2.17021664852493
MMV_Model4	FCFP_6	SciTegic.value.IntegerFingerprintValue	G324	8232855	18	16696426	9	9	2.16169685298739
MMV_Model4	FCFP_6	SciTegic.value.IntegerFingerprintValue	G325	-1856330720	32	16696426	10	10	2.15968923892409
MMV_Model4	FCFP_6	SciTegic.value.IntegerFingerprintValue	G326	55287258	32	16696426	10	10	2.15968923892409
MMV_Model4	FCFP_6	SciTegic.value.IntegerFingerprintValue	G327	-1848412645	32	16696426	10	10	2.15968923892409
MMV_Model4	FCFP_6	SciTegic.value.IntegerFingerprintValue	G328	515094653	32	16696426	10	10	2.15968923892409
MMV_Model4	FCFP_6	SciTegic.value.IntegerFingerprintValue	G329	-1749999311	87	16696426	14	14	2.15919850180871
MMV_Model4	FCFP_6	SciTegic.value.IntegerFingerprintValue	G330	1625766102	46	16696426	11	11	2.15801930058582
MMV_Model4	FCFP_6	SciTegic.value.IntegerFingerprintValue	G331	1143101171	156	16696426	19	19	2.15795166298701
MMV_Model4	FCFP_6	SciTegic.value.IntegerFingerprintValue	G332	609127571	60	16696426	12	12	2.15660845073055
MMV_Model4	FCFP_6	SciTegic.value.IntegerFingerprintValue	G333	-1320528684	145	16696426	18	18	2.14748459033562
MMV_Model4	FCFP_6	SciTegic.value.IntegerFingerprintValue	G334	1749844379	34	16696426	10	10	2.14652873891509
MMV_Model4	FCFP_6	SciTegic.value.IntegerFingerprintValue	G335	889317693	541	16696426	46	46	2.13683907464279
MMV_Model4	FCFP_6	SciTegic.value.IntegerFingerprintValue	G336	1329079850	204	16696426	22	22	2.13681730331781
MMV_Model4	FCFP_6	SciTegic.value.IntegerFingerprintValue	G337	-1803839607	50	16696426	11	11	2.1340620572112
MMV_Model4	FCFP_6	SciTegic.value.IntegerFingerprintValue	G338	1239695757	22	16696426	9	9	2.13291211065885
MMV_Model4	FCFP_6	SciTegic.value.IntegerFingerprintValue	G339	1935427586	163	16696426	19	19	2.13281317138258
MMV_Model4	FCFP_6	SciTegic.value.IntegerFingerprintValue	G340	-253344713	121	16696426	16	16	2.13157970314765
MMV_Model4	FCFP_6	SciTegic.value.IntegerFingerprintValue	G341	125753059	418	16696426	37	37	2.13052905507398
MMV_Model4	FCFP_6	SciTegic.value.IntegerFingerprintValue	G342	136358998	65	16696426	12	12	2.12905426331971
MMV_Model4	FCFP_6	SciTegic.value.IntegerFingerprintValue	G343	-1665640812	207	16696426	22	22	2.12757145031153
MMV_Model4	FCFP_6	SciTegic.value.IntegerFingerprintValue	G344	-882046675	66	16696426	12	12	2.12363337619836
MMV_Model4	FCFP_6	SciTegic.value.IntegerFingerprintValue	G345	950497596	24	16696426	9	9	2.11882460311182
MMV_Model4	FCFP_6	SciTegic.value.IntegerFingerprintValue	G346	-2047642177	167	16696426	19	19	2.11872704780415
MMV_Model4	FCFP_6	SciTegic.value.IntegerFingerprintValue	G347	865847361	67	16696426	12	12	2.1182417167256
MMV_Model4	FCFP_6	SciTegic.value.IntegerFingerprintValue	G348	364059475	53	16696426	11	11	2.11646341573146
MMV_Model4	FCFP_6	SciTegic.value.IntegerFingerprintValue	G349	1961474505	212	16696426	22	22	2.11234916355077
MMV_Model4	FCFP_6	SciTegic.value.IntegerFingerprintValue	G350	-753668274	25	16696426	9	9	2.11185457879573
MMV_Model4	FCFP_6	SciTegic.value.IntegerFingerprintValue	G351	-1704571266	25	16696426	9	9	2.11185457879573
MMV_Model4	FCFP_6	SciTegic.value.IntegerFingerprintValue	G352	888402603	11	16696426	8	8	2.10879377946195
MMV_Model4	FCFP_6	SciTegic.value.IntegerFingerprintValue	G353	-2086098187	185	16696426	20	20	2.10647554538452
MMV_Model4	FCFP_6	SciTegic.value.IntegerFingerprintValue	G354	854709002	707	16696426	56	56	2.10537930745019
MMV_Model4	FCFP_6	SciTegic.value.IntegerFingerprintValue	G355	1345325556	12	16696426	8	8	2.10112926827243
MMV_Model4	FCFP_6	SciTegic.value.IntegerFingerprintValue	G356	-2042519648	218	16696426	22	22	2.09438310791299
MMV_Model4	FCFP_6	SciTegic.value.IntegerFingerprintValue	G357	1895162522	13	16696426	8	8	2.09352305527079
MMV_Model4	FCFP_6	SciTegic.value.IntegerFingerprintValue	G358	208381784	13	16696426	8	8	2.09352305527079
MMV_Model4	FCFP_6	SciTegic.value.IntegerFingerprintValue	G359	-1129482391	13	16696426	8	8	2.09352305527079
MMV_Model4	FCFP_6	SciTegic.value.IntegerFingerprintValue	G360	112301197	116	16696426	15	15	2.09201096393447
MMV_Model4	FCFP_6	SciTegic.value.IntegerFingerprintValue	G361	1472129503	219	16696426	22	22	2.09141989785194
MMV_Model4	FCFP_6	SciTegic.value.IntegerFingerprintValue	G362	-1830096975	219	16696426	22	22	2.09141989785194
MMV_Model4	FCFP_6	SciTegic.value.IntegerFingerprintValue	G363	-1283677440	28	16696426	9	9	2.09123133721572
MMV_Model4	FCFP_6	SciTegic.value.IntegerFingerprintValue	G364	2007099055	220	16696426	22	22	2.08846544246919
MMV_Model4	FCFP_6	SciTegic.value.IntegerFingerprintValue	G365	1115412882	516	16696426	42	42	2.08650808891169
MMV_Model4	FCFP_6	SciTegic.value.IntegerFingerprintValue	G366	1752614654	14	16696426	8	8	2.08597426028643
MMV_Model4	FCFP_6	SciTegic.value.IntegerFingerprintValue	G367	-773603479	14	16696426	8	8	2.08597426028643
MMV_Model4	FCFP_6	SciTegic.value.IntegerFingerprintValue	G368	-1422621286	14	16696426	8	8	2.08597426028643
MMV_Model4	FCFP_6	SciTegic.value.IntegerFingerprintValue	G369	-1477942348	14	16696426	8	8	2.08597426028643
MMV_Model4	FCFP_6	SciTegic.value.IntegerFingerprintValue	G370	1077413244	221	16696426	22	22	2.08551969018643
MMV_Model4	FCFP_6	SciTegic.value.IntegerFingerprintValue	G371	-169458216	281	16696426	26	26	2.08333110244627
MMV_Model4	FCFP_6	SciTegic.value.IntegerFingerprintValue	G372	-320455445	681	16696426	53	53	2.0832962297025
MMV_Model4	FCFP_6	SciTegic.value.IntegerFingerprintValue	G373	-1633399590	44	16696426	10	10	2.0832052715353
MMV_Model4	FCFP_6	SciTegic.value.IntegerFingerprintValue	G374	-1442189381	59	16696426	11	11	2.08216887429134
MMV_Model4	FCFP_6	SciTegic.value.IntegerFingerprintValue	G375	86174029	15	16696426	8	8	2.0784820229324
MMV_Model4	FCFP_6	SciTegic.value.IntegerFingerprintValue	G376	878342080	731	16696426	56	56	2.07673677785634
MMV_Model4	FCFP_6	SciTegic.value.IntegerFingerprintValue	G377	-1615465267	1645	16696426	117	117	2.07425024177848
MMV_Model4	FCFP_6	SciTegic.value.IntegerFingerprintValue	G378	1693770080	16	16696426	8	8	2.07104550201685
MMV_Model4	FCFP_6	SciTegic.value.IntegerFingerprintValue	G379	-1670377155	181	16696426	19	19	2.07093183161919
MMV_Model4	FCFP_6	SciTegic.value.IntegerFingerprintValue	G380	-455902222	62	16696426	11	11	2.06545279529113
MMV_Model4	FCFP_6	SciTegic.value.IntegerFingerprintValue	G381	1716259455	998	16696426	73	73	2.06457730842158
MMV_Model4	FCFP_6	SciTegic.value.IntegerFingerprintValue	G382	819564105	425	16696426	35	35	2.06351001295778
MMV_Model4	FCFP_6	SciTegic.value.IntegerFingerprintValue	G383	1443156211	170	16696426	18	18	2.05699786348907
MMV_Model4	FCFP_6	SciTegic.value.IntegerFingerprintValue	G384	824134200	18	16696426	8	8	2.05633633732956
MMV_Model4	FCFP_6	SciTegic.value.IntegerFingerprintValue	G385	368921335	186	16696426	19	19	2.05440100511559
MMV_Model4	FCFP_6	SciTegic.value.IntegerFingerprintValue	G386	1392070843	49	16696426	10	10	2.05298639846029
MMV_Model4	FCFP_6	SciTegic.value.IntegerFingerprintValue	G387	717362545	34	16696426	9	9	2.05121855911076
MMV_Model4	FCFP_6	SciTegic.value.IntegerFingerprintValue	G388	-1315036224	172	16696426	18	18	2.05010062094008
MMV_Model4	FCFP_6	SciTegic.value.IntegerFingerprintValue	G389	-1955936995	19	16696426	8	8	2.04906210215171
MMV_Model4	FCFP_6	SciTegic.value.IntegerFingerprintValue	G390	-2037718156	65	16696426	11	11	2.04901155564618
MMV_Model4	FCFP_6	SciTegic.value.IntegerFingerprintValue	G391	1651875941	111	16696426	14	14	2.04898122896919
MMV_Model4	FCFP_6	SciTegic.value.IntegerFingerprintValue	G392	1875633498	203	16696426	20	20	2.0489465710359
MMV_Model4	FCFP_6	SciTegic.value.IntegerFingerprintValue	G393	1964587845	280	16696426	25	25	2.04809407948532
MMV_Model4	FCFP_6	SciTegic.value.IntegerFingerprintValue	G394	1283231420	35	16696426	9	9	2.04470269390289
MMV_Model4	FCFP_6	SciTegic.value.IntegerFingerprintValue	G395	-1823548416	113	16696426	14	14	2.04032212049499
MMV_Model4	FCFP_6	SciTegic.value.IntegerFingerprintValue	G396	513707447	36	16696426	9	9	2.03822901049179
MMV_Model4	FCFP_6	SciTegic.value.IntegerFingerprintValue	G397	-617250698	362	16696426	30	30	2.03706697271139
MMV_Model4	FCFP_6	SciTegic.value.IntegerFingerprintValue	G398	462698933	52	16696426	10	10	2.03528390768836
MMV_Model4	FCFP_6	SciTegic.value.IntegerFingerprintValue	G399	-1594630278	130	16696426	15	15	2.03413690641329
MMV_Model4	FCFP_6	SciTegic.value.IntegerFingerprintValue	G400	-1303617740	769	16696426	56	56	2.03299997985727
MMV_Model4	FCFP_6	SciTegic.value.IntegerFingerprintValue	G401	1467925629	37	16696426	9	9	2.03179696624333
MMV_Model4	FCFP_6	SciTegic.value.IntegerFingerprintValue	G402	802485779	38	16696426	9	9	2.02540602892729
MMV_Model4	FCFP_6	SciTegic.value.IntegerFingerprintValue	G403	1839282582	38	16696426	9	9	2.02540602892729
MMV_Model4	FCFP_6	SciTegic.value.IntegerFingerprintValue	G404	1767215166	38	16696426	9	9	2.02540602892729
MMV_Model4	FCFP_6	SciTegic.value.IntegerFingerprintValue	G405	881889139	148	16696426	16	16	2.02495821254946
MMV_Model4	FCFP_6	SciTegic.value.IntegerFingerprintValue	G406	498498805	7	16696426	7	7	2.02227010118476
MMV_Model4	FCFP_6	SciTegic.value.IntegerFingerprintValue	G407	-1862215078	7	16696426	7	7	2.02227010118476
MMV_Model4	FCFP_6	SciTegic.value.IntegerFingerprintValue	G408	-1973901624	7	16696426	7	7	2.02227010118476
MMV_Model4	FCFP_6	SciTegic.value.IntegerFingerprintValue	G409	1823602313	7	16696426	7	7	2.02227010118476
MMV_Model4	FCFP_6	SciTegic.value.IntegerFingerprintValue	G410	-1748251193	7	16696426	7	7	2.02227010118476
MMV_Model4	FCFP_6	SciTegic.value.IntegerFingerprintValue	G411	1122309269	102	16696426	13	13	2.01990990491715
MMV_Model4	FCFP_6	SciTegic.value.IntegerFingerprintValue	G412	-1284705294	71	16696426	11	11	2.01691845261085
MMV_Model4	FCFP_6	SciTegic.value.IntegerFingerprintValue	G413	1215320514	71	16696426	11	11	2.01691845261085
MMV_Model4	FCFP_6	SciTegic.value.IntegerFingerprintValue	G414	-527332141	8	16696426	7	7	2.01436317796504
MMV_Model4	FCFP_6	SciTegic.value.IntegerFingerprintValue	G415	-964667112	24	16696426	8	8	2.013464087454
MMV_Model4	FCFP_6	SciTegic.value.IntegerFingerprintValue	G416	-1296135389	390	16696426	31	31	2.01223173397609
MMV_Model4	FCFP_6	SciTegic.value.IntegerFingerprintValue	G417	1342362691	104	16696426	13	13	2.0108997027287
MMV_Model4	FCFP_6	SciTegic.value.IntegerFingerprintValue	G418	1424425123	9	16696426	7	7	2.00651828403988
MMV_Model4	FCFP_6	SciTegic.value.IntegerFingerprintValue	G419	-1537492210	9	16696426	7	7	2.00651828403988
MMV_Model4	FCFP_6	SciTegic.value.IntegerFingerprintValue	G420	497942300	9	16696426	7	7	2.00651828403988
MMV_Model4	FCFP_6	SciTegic.value.IntegerFingerprintValue	G421	987381933	9	16696426	7	7	2.00651828403988
MMV_Model4	FCFP_6	SciTegic.value.IntegerFingerprintValue	G422	-115708295	9	16696426	7	7	2.00651828403988
MMV_Model4	FCFP_6	SciTegic.value.IntegerFingerprintValue	G423	-1798161883	9	16696426	7	7	2.00651828403988
MMV_Model4	FCFP_6	SciTegic.value.IntegerFingerprintValue	G424	1300763339	9	16696426	7	7	2.00651828403988
MMV_Model4	FCFP_6	SciTegic.value.IntegerFingerprintValue	G425	-854903031	9	16696426	7	7	2.00651828403988
MMV_Model4	FCFP_6	SciTegic.value.IntegerFingerprintValue	G426	-385713399	9	16696426	7	7	2.00651828403988
MMV_Model4	FCFP_6	SciTegic.value.IntegerFingerprintValue	G427	526753824	9	16696426	7	7	2.00651828403988
MMV_Model4	FCFP_6	SciTegic.value.IntegerFingerprintValue	G428	-1523491171	9	16696426	7	7	2.00651828403988
MMV_Model4	FCFP_6	SciTegic.value.IntegerFingerprintValue	G429	2094209418	9	16696426	7	7	2.00651828403988
MMV_Model4	FCFP_6	SciTegic.value.IntegerFingerprintValue	G430	-1762968257	58	16696426	10	10	2.00079220060115
MMV_Model4	FCFP_6	SciTegic.value.IntegerFingerprintValue	G431	1080245078	42	16696426	9	9	2.00024305395198
MMV_Model4	FCFP_6	SciTegic.value.IntegerFingerprintValue	G432	913473117	42	16696426	9	9	2.00024305395198
MMV_Model4	FCFP_6	SciTegic.value.IntegerFingerprintValue	G433	1654757232	10	16696426	7	7	1.99873445374841
MMV_Model4	FCFP_6	SciTegic.value.IntegerFingerprintValue	G434	-216977108	10	16696426	7	7	1.99873445374841
MMV_Model4	FCFP_6	SciTegic.value.IntegerFingerprintValue	G435	902199639	10	16696426	7	7	1.99873445374841
MMV_Model4	FCFP_6	SciTegic.value.IntegerFingerprintValue	G436	-491485365	10	16696426	7	7	1.99873445374841
MMV_Model4	FCFP_6	SciTegic.value.IntegerFingerprintValue	G437	-1193470290	10	16696426	7	7	1.99873445374841
MMV_Model4	FCFP_6	SciTegic.value.IntegerFingerprintValue	G438	475228644	10	16696426	7	7	1.99873445374841
MMV_Model4	FCFP_6	SciTegic.value.IntegerFingerprintValue	G439	-1035240309	123	16696426	14	14	1.99811679663634
MMV_Model4	FCFP_6	SciTegic.value.IntegerFingerprintValue	G440	-560982165	123	16696426	14	14	1.99811679663634
MMV_Model4	FCFP_6	SciTegic.value.IntegerFingerprintValue	G441	209496147	736	16696426	52	52	1.99811211218723
MMV_Model4	FCFP_6	SciTegic.value.IntegerFingerprintValue	G442	-1589661876	91	16696426	12	12	1.9968637164456
MMV_Model4	FCFP_6	SciTegic.value.IntegerFingerprintValue	G443	-138734999	253	16696426	22	22	1.99556439497159
MMV_Model4	FCFP_6	SciTegic.value.IntegerFingerprintValue	G444	-1014939385	27	16696426	8	8	1.99269808669581
MMV_Model4	FCFP_6	SciTegic.value.IntegerFingerprintValue	G445	1537357893	27	16696426	8	8	1.99269808669581
MMV_Model4	FCFP_6	SciTegic.value.IntegerFingerprintValue	G446	193183232	27	16696426	8	8	1.99269808669581
MMV_Model4	FCFP_6	SciTegic.value.IntegerFingerprintValue	G447	-123618018	27	16696426	8	8	1.99269808669581
MMV_Model4	FCFP_6	SciTegic.value.IntegerFingerprintValue	G448	-1853044315	11	16696426	7	7	1.99101074380557
MMV_Model4	FCFP_6	SciTegic.value.IntegerFingerprintValue	G449	739682350	11	16696426	7	7	1.99101074380557
MMV_Model4	FCFP_6	SciTegic.value.IntegerFingerprintValue	G450	-1840018098	11	16696426	7	7	1.99101074380557
MMV_Model4	FCFP_6	SciTegic.value.IntegerFingerprintValue	G451	-815125785	11	16696426	7	7	1.99101074380557
MMV_Model4	FCFP_6	SciTegic.value.IntegerFingerprintValue	G452	130916486	11	16696426	7	7	1.99101074380557
MMV_Model4	FCFP_6	SciTegic.value.IntegerFingerprintValue	G453	-820445608	44	16696426	9	9	1.98789509173098
MMV_Model4	FCFP_6	SciTegic.value.IntegerFingerprintValue	G454	1057938315	61	16696426	10	10	1.98398245506287
MMV_Model4	FCFP_6	SciTegic.value.IntegerFingerprintValue	G455	-1665899054	45	16696426	9	9	1.98177782096461
MMV_Model4	FCFP_6	SciTegic.value.IntegerFingerprintValue	G456	2123527535	111	16696426	13	13	1.97998835748224
MMV_Model4	FCFP_6	SciTegic.value.IntegerFingerprintValue	G457	524331407	29	16696426	8	8	1.97908985207514
MMV_Model4	FCFP_6	SciTegic.value.IntegerFingerprintValue	G458	-1727992970	260	16696426	22	22	1.97692065899719
MMV_Model4	FCFP_6	SciTegic.value.IntegerFingerprintValue	G459	690749505	13	16696426	7	7	1.9757400196144
MMV_Model4	FCFP_6	SciTegic.value.IntegerFingerprintValue	G460	1672695215	195	16696426	18	18	1.97402387959093
MMV_Model4	FCFP_6	SciTegic.value.IntegerFingerprintValue	G461	-1156102785	14	16696426	7	7	1.96819122463005
MMV_Model4	FCFP_6	SciTegic.value.IntegerFingerprintValue	G462	-891329944	14	16696426	7	7	1.96819122463005
MMV_Model4	FCFP_6	SciTegic.value.IntegerFingerprintValue	G463	647023047	14	16696426	7	7	1.96819122463005
MMV_Model4	FCFP_6	SciTegic.value.IntegerFingerprintValue	G464	-285027162	14	16696426	7	7	1.96819122463005
MMV_Model4	FCFP_6	SciTegic.value.IntegerFingerprintValue	G465	-1618884095	64	16696426	10	10	1.96745061203475
MMV_Model4	FCFP_6	SciTegic.value.IntegerFingerprintValue	G466	-788368356	31	16696426	8	8	1.96566431805291
MMV_Model4	FCFP_6	SciTegic.value.IntegerFingerprintValue	G467	-2044758842	198	16696426	18	18	1.96451425076105
MMV_Model4	FCFP_6	SciTegic.value.IntegerFingerprintValue	G468	-1907529446	48	16696426	9	9	1.96364738013145
MMV_Model4	FCFP_6	SciTegic.value.IntegerFingerprintValue	G469	-1317238657	15	16696426	7	7	1.96069898727602
MMV_Model4	FCFP_6	SciTegic.value.IntegerFingerprintValue	G470	-720414963	15	16696426	7	7	1.96069898727602
MMV_Model4	FCFP_6	SciTegic.value.IntegerFingerprintValue	G471	629565480	15	16696426	7	7	1.96069898727602
MMV_Model4	FCFP_6	SciTegic.value.IntegerFingerprintValue	G472	217236191	15	16696426	7	7	1.96069898727602
MMV_Model4	FCFP_6	SciTegic.value.IntegerFingerprintValue	G473	153483420	32	16696426	8	8	1.95901854346194
MMV_Model4	FCFP_6	SciTegic.value.IntegerFingerprintValue	G474	-1473415192	200	16696426	18	18	1.95822437006639
MMV_Model4	FCFP_6	SciTegic.value.IntegerFingerprintValue	G475	1483341511	200	16696426	18	18	1.95822437006639
MMV_Model4	FCFP_6	SciTegic.value.IntegerFingerprintValue	G476	-884291388	49	16696426	9	9	1.95767621865597
MMV_Model4	FCFP_6	SciTegic.value.IntegerFingerprintValue	G477	-1612426301	269	16696426	22	22	1.95344981697267
MMV_Model4	FCFP_6	SciTegic.value.IntegerFingerprintValue	G478	-1744474040	16	16696426	7	7	1.95326246636047
MMV_Model4	FCFP_6	SciTegic.value.IntegerFingerprintValue	G479	-311065867	475	16696426	34	34	1.94740474670968
MMV_Model4	FCFP_6	SciTegic.value.IntegerFingerprintValue	G480	593770169	153	16696426	15	15	1.94577826201055
MMV_Model4	FCFP_6	SciTegic.value.IntegerFingerprintValue	G481	421490348	153	16696426	15	15	1.94577826201055
MMV_Model4	FCFP_6	SciTegic.value.IntegerFingerprintValue	G482	-1393035223	153	16696426	15	15	1.94577826201055
MMV_Model4	FCFP_6	SciTegic.value.IntegerFingerprintValue	G483	-1773715875	2976	16696426	180	180	1.93985189895109
MMV_Model4	FCFP_6	SciTegic.value.IntegerFingerprintValue	G484	-550198050	1472	16696426	92	92	1.93938803833674
MMV_Model4	FCFP_6	SciTegic.value.IntegerFingerprintValue	G485	349546532	155	16696426	15	15	1.93845147321768
MMV_Model4	FCFP_6	SciTegic.value.IntegerFingerprintValue	G486	-251999736	155	16696426	15	15	1.93845147321768
MMV_Model4	FCFP_6	SciTegic.value.IntegerFingerprintValue	G487	1182186598	155	16696426	15	15	1.93845147321768
MMV_Model4	FCFP_6	SciTegic.value.IntegerFingerprintValue	G488	1374859975	53	16696426	9	9	1.9341418589375
MMV_Model4	FCFP_6	SciTegic.value.IntegerFingerprintValue	G489	-157187493	53	16696426	9	9	1.9341418589375
MMV_Model4	FCFP_6	SciTegic.value.IntegerFingerprintValue	G490	839741273	4632	16696426	275	275	1.93318537558675
MMV_Model4	FCFP_6	SciTegic.value.IntegerFingerprintValue	G491	-1028012959	19	16696426	7	7	1.93127906649533
MMV_Model4	FCFP_6	SciTegic.value.IntegerFingerprintValue	G492	634916113	123	16696426	13	13	1.92912392514938
MMV_Model4	FCFP_6	SciTegic.value.IntegerFingerprintValue	G493	-244397187	123	16696426	13	13	1.92912392514938
MMV_Model4	FCFP_6	SciTegic.value.IntegerFingerprintValue	G494	-1115054081	193	16696426	17	17	1.92634702597729
MMV_Model4	FCFP_6	SciTegic.value.IntegerFingerprintValue	G495	1712481571	193	16696426	17	17	1.92634702597729
MMV_Model4	FCFP_6	SciTegic.value.IntegerFingerprintValue	G496	-1709834349	20	16696426	7	7	1.92405736391044
MMV_Model4	FCFP_6	SciTegic.value.IntegerFingerprintValue	G497	804852474	159	16696426	15	15	1.92395700083315
MMV_Model4	FCFP_6	SciTegic.value.IntegerFingerprintValue	G498	40280008	55	16696426	9	9	1.92257917197915
MMV_Model4	FCFP_6	SciTegic.value.IntegerFingerprintValue	G499	-2106646188	229	16696426	19	19	1.92249899930498
MMV_Model4	FCFP_6	SciTegic.value.IntegerFingerprintValue	G500	404908543	22	16696426	7	7	1.90976855934464
MMV_Model4	FCFP_6	SciTegic.value.IntegerFingerprintValue	G501	-669152664	163	16696426	15	15	1.90966962006837
MMV_Model4	FCFP_6	SciTegic.value.IntegerFingerprintValue	G502	1018056817	163	16696426	15	15	1.90966962006837
MMV_Model4	FCFP_6	SciTegic.value.IntegerFingerprintValue	G503	378417559	163	16696426	15	15	1.90966962006837
MMV_Model4	FCFP_6	SciTegic.value.IntegerFingerprintValue	G504	992280788	128	16696426	13	13	1.90867098089423
MMV_Model4	FCFP_6	SciTegic.value.IntegerFingerprintValue	G505	638297905	128	16696426	13	13	1.90867098089423
MMV_Model4	FCFP_6	SciTegic.value.IntegerFingerprintValue	G506	-670509155	128	16696426	13	13	1.90867098089423
MMV_Model4	FCFP_6	SciTegic.value.IntegerFingerprintValue	G507	244690668	128	16696426	13	13	1.90867098089423
MMV_Model4	FCFP_6	SciTegic.value.IntegerFingerprintValue	G508	180146320	128	16696426	13	13	1.90867098089423
MMV_Model4	FCFP_6	SciTegic.value.IntegerFingerprintValue	G509	1356060654	40	16696426	8	8	1.9073848809561
MMV_Model4	FCFP_6	SciTegic.value.IntegerFingerprintValue	G510	1057249994	40	16696426	8	8	1.9073848809561
MMV_Model4	FCFP_6	SciTegic.value.IntegerFingerprintValue	G511	107483591	93	16696426	11	11	1.90734101142917
MMV_Model4	FCFP_6	SciTegic.value.IntegerFingerprintValue	G512	1525489988	111	16696426	12	12	1.90588038532851
MMV_Model4	FCFP_6	SciTegic.value.IntegerFingerprintValue	G513	-1427208979	58	16696426	9	9	1.90548202079683
MMV_Model4	FCFP_6	SciTegic.value.IntegerFingerprintValue	G514	-823682749	58	16696426	9	9	1.90548202079683
MMV_Model4	FCFP_6	SciTegic.value.IntegerFingerprintValue	G515	434542500	129	16696426	13	13	1.90463011589358
MMV_Model4	FCFP_6	SciTegic.value.IntegerFingerprintValue	G516	2078098561	76	16696426	10	10	1.90392782393054
MMV_Model4	FCFP_6	SciTegic.value.IntegerFingerprintValue	G517	1163002358	218	16696426	18	18	1.90332787115028
MMV_Model4	FCFP_6	SciTegic.value.IntegerFingerprintValue	G518	-665967352	218	16696426	18	18	1.90332787115028
MMV_Model4	FCFP_6	SciTegic.value.IntegerFingerprintValue	G519	-1581656679	77	16696426	10	10	1.89881199326071
MMV_Model4	FCFP_6	SciTegic.value.IntegerFingerprintValue	G520	1240659426	6	16696426	6	6	1.89670864982454
MMV_Model4	FCFP_6	SciTegic.value.IntegerFingerprintValue	G521	-1253077173	6	16696426	6	6	1.89670864982454
MMV_Model4	FCFP_6	SciTegic.value.IntegerFingerprintValue	G522	1025401938	6	16696426	6	6	1.89670864982454
MMV_Model4	FCFP_6	SciTegic.value.IntegerFingerprintValue	G523	1395120895	508	16696426	34	34	1.89333505352628
MMV_Model4	FCFP_6	SciTegic.value.IntegerFingerprintValue	G524	-887283423	168	16696426	15	15	1.89209275165284
MMV_Model4	FCFP_6	SciTegic.value.IntegerFingerprintValue	G525	659808785	7	16696426	6	6	1.88873870856024
MMV_Model4	FCFP_6	SciTegic.value.IntegerFingerprintValue	G526	536617146	7	16696426	6	6	1.88873870856024
MMV_Model4	FCFP_6	SciTegic.value.IntegerFingerprintValue	G527	-1647247879	7	16696426	6	6	1.88873870856024
MMV_Model4	FCFP_6	SciTegic.value.IntegerFingerprintValue	G528	-1988662266	7	16696426	6	6	1.88873870856024
MMV_Model4	FCFP_6	SciTegic.value.IntegerFingerprintValue	G529	-858511676	7	16696426	6	6	1.88873870856024
MMV_Model4	FCFP_6	SciTegic.value.IntegerFingerprintValue	G530	-12099065	7	16696426	6	6	1.88873870856024
MMV_Model4	FCFP_6	SciTegic.value.IntegerFingerprintValue	G531	1930373363	7	16696426	6	6	1.88873870856024
MMV_Model4	FCFP_6	SciTegic.value.IntegerFingerprintValue	G532	700905623	7	16696426	6	6	1.88873870856024
MMV_Model4	FCFP_6	SciTegic.value.IntegerFingerprintValue	G533	-402117149	7	16696426	6	6	1.88873870856024
MMV_Model4	FCFP_6	SciTegic.value.IntegerFingerprintValue	G534	935475470	7	16696426	6	6	1.88873870856024
MMV_Model4	FCFP_6	SciTegic.value.IntegerFingerprintValue	G535	1897195699	25	16696426	7	7	1.88871102748152
MMV_Model4	FCFP_6	SciTegic.value.IntegerFingerprintValue	G536	414792462	925	16696426	57	57	1.88854400275056
MMV_Model4	FCFP_6	SciTegic.value.IntegerFingerprintValue	G537	374566231	442	16696426	30	30	1.88320506627902
MMV_Model4	FCFP_6	SciTegic.value.IntegerFingerprintValue	G538	553889541	207	16696426	17	17	1.88244899227854
MMV_Model4	FCFP_6	SciTegic.value.IntegerFingerprintValue	G539	-2129711522	26	16696426	7	7	1.88178924832839
MMV_Model4	FCFP_6	SciTegic.value.IntegerFingerprintValue	G540	-412448960	8	16696426	6	6	1.88083178534051
MMV_Model4	FCFP_6	SciTegic.value.IntegerFingerprintValue	G541	-870225195	8	16696426	6	6	1.88083178534051
MMV_Model4	FCFP_6	SciTegic.value.IntegerFingerprintValue	G542	1787039480	8	16696426	6	6	1.88083178534051
MMV_Model4	FCFP_6	SciTegic.value.IntegerFingerprintValue	G543	-1758178433	336	16696426	24	24	1.87752875858249
MMV_Model4	FCFP_6	SciTegic.value.IntegerFingerprintValue	G544	150748083	648	16696426	41	41	1.87410822808907
MMV_Model4	FCFP_6	SciTegic.value.IntegerFingerprintValue	G545	354623201	9	16696426	6	6	1.87298689141535
MMV_Model4	FCFP_6	SciTegic.value.IntegerFingerprintValue	G546	1675666263	9	16696426	6	6	1.87298689141535
MMV_Model4	FCFP_6	SciTegic.value.IntegerFingerprintValue	G547	-1495186533	9	16696426	6	6	1.87298689141535
MMV_Model4	FCFP_6	SciTegic.value.IntegerFingerprintValue	G548	-773479387	796	16696426	49	49	1.87201846813165
MMV_Model4	FCFP_6	SciTegic.value.IntegerFingerprintValue	G549	-463222919	46	16696426	8	8	1.87033722813404
MMV_Model4	FCFP_6	SciTegic.value.IntegerFingerprintValue	G550	724879585	10	16696426	6	6	1.86520306112389
MMV_Model4	FCFP_6	SciTegic.value.IntegerFingerprintValue	G551	-1549886662	10	16696426	6	6	1.86520306112389
MMV_Model4	FCFP_6	SciTegic.value.IntegerFingerprintValue	G552	-922746622	10	16696426	6	6	1.86520306112389
MMV_Model4	FCFP_6	SciTegic.value.IntegerFingerprintValue	G553	619157943	10	16696426	6	6	1.86520306112389
MMV_Model4	FCFP_6	SciTegic.value.IntegerFingerprintValue	G554	-71497726	84	16696426	10	10	1.86371576482199
MMV_Model4	FCFP_6	SciTegic.value.IntegerFingerprintValue	G555	-1853770299	84	16696426	10	10	1.86371576482199
MMV_Model4	FCFP_6	SciTegic.value.IntegerFingerprintValue	G556	1087119432	84	16696426	10	10	1.86371576482199
MMV_Model4	FCFP_6	SciTegic.value.IntegerFingerprintValue	G557	-457187560	48	16696426	8	8	1.85828686447362
MMV_Model4	FCFP_6	SciTegic.value.IntegerFingerprintValue	G558	-1369137582	11	16696426	6	6	1.85747935118105
MMV_Model4	FCFP_6	SciTegic.value.IntegerFingerprintValue	G559	763098555	255	16696426	19	19	1.85044010840246
MMV_Model4	FCFP_6	SciTegic.value.IntegerFingerprintValue	G560	-1172231923	12	16696426	6	6	1.84981483999152
MMV_Model4	FCFP_6	SciTegic.value.IntegerFingerprintValue	G561	122936491	12	16696426	6	6	1.84981483999152
MMV_Model4	FCFP_6	SciTegic.value.IntegerFingerprintValue	G562	-232166398	12	16696426	6	6	1.84981483999152
MMV_Model4	FCFP_6	SciTegic.value.IntegerFingerprintValue	G563	1727997935	12	16696426	6	6	1.84981483999152
MMV_Model4	FCFP_6	SciTegic.value.IntegerFingerprintValue	G564	1629714946	31	16696426	7	7	1.84788128239653
MMV_Model4	FCFP_6	SciTegic.value.IntegerFingerprintValue	G565	1235002638	31	16696426	7	7	1.84788128239653
MMV_Model4	FCFP_6	SciTegic.value.IntegerFingerprintValue	G566	1781661226	31	16696426	7	7	1.84788128239653
MMV_Model4	FCFP_6	SciTegic.value.IntegerFingerprintValue	G567	1072522492	31	16696426	7	7	1.84788128239653
MMV_Model4	FCFP_6	SciTegic.value.IntegerFingerprintValue	G568	1232560717	31	16696426	7	7	1.84788128239653
MMV_Model4	FCFP_6	SciTegic.value.IntegerFingerprintValue	G569	731035893	13	16696426	6	6	1.84220862698988
MMV_Model4	FCFP_6	SciTegic.value.IntegerFingerprintValue	G570	1630771044	13	16696426	6	6	1.84220862698988
MMV_Model4	FCFP_6	SciTegic.value.IntegerFingerprintValue	G571	-1944369464	13	16696426	6	6	1.84220862698988
MMV_Model4	FCFP_6	SciTegic.value.IntegerFingerprintValue	G572	706189422	51	16696426	8	8	1.84047929147568
MMV_Model4	FCFP_6	SciTegic.value.IntegerFingerprintValue	G573	-297670203	89	16696426	10	10	1.83938036029217
MMV_Model4	FCFP_6	SciTegic.value.IntegerFingerprintValue	G574	1294344583	317	16696426	22	22	1.83680499724448
MMV_Model4	FCFP_6	SciTegic.value.IntegerFingerprintValue	G575	1118185422	14	16696426	6	6	1.83465983200553
MMV_Model4	FCFP_6	SciTegic.value.IntegerFingerprintValue	G576	1311862563	71	16696426	9	9	1.8345968958169
MMV_Model4	FCFP_6	SciTegic.value.IntegerFingerprintValue	G577	1469577586	90	16696426	10	10	1.83458354622548
MMV_Model4	FCFP_6	SciTegic.value.IntegerFingerprintValue	G578	-437265890	91	16696426	10	10	1.82980963178243
MMV_Model4	FCFP_6	SciTegic.value.IntegerFingerprintValue	G579	-1216865348	15	16696426	6	6	1.8271675946515
MMV_Model4	FCFP_6	SciTegic.value.IntegerFingerprintValue	G580	-798164718	15	16696426	6	6	1.8271675946515
MMV_Model4	FCFP_6	SciTegic.value.IntegerFingerprintValue	G581	-240958189	130	16696426	12	12	1.82649754163505
MMV_Model4	FCFP_6	SciTegic.value.IntegerFingerprintValue	G582	-22532975	189	16696426	15	15	1.82146855646411
MMV_Model4	FCFP_6	SciTegic.value.IntegerFingerprintValue	G583	946279964	93	16696426	10	10	1.82032963443954
MMV_Model4	FCFP_6	SciTegic.value.IntegerFingerprintValue	G584	-1115530046	16	16696426	6	6	1.81973107373595
MMV_Model4	FCFP_6	SciTegic.value.IntegerFingerprintValue	G585	-477796379	74	16696426	9	9	1.81892849648724
MMV_Model4	FCFP_6	SciTegic.value.IntegerFingerprintValue	G586	72016488	36	16696426	7	7	1.81508545917758
MMV_Model4	FCFP_6	SciTegic.value.IntegerFingerprintValue	G587	-1433880123	75	16696426	9	9	1.81375978115604
MMV_Model4	FCFP_6	SciTegic.value.IntegerFingerprintValue	G588	545441700	37	16696426	7	7	1.80865341492912
MMV_Model4	FCFP_6	SciTegic.value.IntegerFingerprintValue	G589	-775808928	135	16696426	12	12	1.80661396542151
MMV_Model4	FCFP_6	SciTegic.value.IntegerFingerprintValue	G590	568035529	703	16696426	41	41	1.80485220071627
MMV_Model4	FCFP_6	SciTegic.value.IntegerFingerprintValue	G591	1943318206	77	16696426	9	9	1.80350181345638
MMV_Model4	FCFP_6	SciTegic.value.IntegerFingerprintValue	G592	1537471574	77	16696426	9	9	1.80350181345638
MMV_Model4	FCFP_6	SciTegic.value.IntegerFingerprintValue	G593	-383144009	77	16696426	9	9	1.80350181345638
MMV_Model4	FCFP_6	SciTegic.value.IntegerFingerprintValue	G594	910998759	273	16696426	19	19	1.80343064071658
MMV_Model4	FCFP_6	SciTegic.value.IntegerFingerprintValue	G595	1142190552	725	16696426	42	42	1.80196971392677
MMV_Model4	FCFP_6	SciTegic.value.IntegerFingerprintValue	G596	-2086593004	58	16696426	8	8	1.800121505139
MMV_Model4	FCFP_6	SciTegic.value.IntegerFingerprintValue	G597	794595584	58	16696426	8	8	1.800121505139
MMV_Model4	FCFP_6	SciTegic.value.IntegerFingerprintValue	G598	-205349237	196	16696426	15	15	1.79899368768026
MMV_Model4	FCFP_6	SciTegic.value.IntegerFingerprintValue	G599	315027566	19	16696426	6	6	1.79774767387081
MMV_Model4	FCFP_6	SciTegic.value.IntegerFingerprintValue	G600	-2064314104	19	16696426	6	6	1.79774767387081
MMV_Model4	FCFP_6	SciTegic.value.IntegerFingerprintValue	G601	-306804326	374	16696426	24	24	1.7973122773759
MMV_Model4	FCFP_6	SciTegic.value.IntegerFingerprintValue	G602	-1526715196	39	16696426	7	7	1.79591212513889
MMV_Model4	FCFP_6	SciTegic.value.IntegerFingerprintValue	G603	378369158	297	16696426	20	20	1.79279327845015
MMV_Model4	FCFP_6	SciTegic.value.IntegerFingerprintValue	G604	742790379	20	16696426	6	6	1.79052597128592
MMV_Model4	FCFP_6	SciTegic.value.IntegerFingerprintValue	G605	-2043548168	60	16696426	8	8	1.78888367060524
MMV_Model4	FCFP_6	SciTegic.value.IntegerFingerprintValue	G606	-514177882	80	16696426	9	9	1.78830950197659
MMV_Model4	FCFP_6	SciTegic.value.IntegerFingerprintValue	G607	-1189379023	100	16696426	10	10	1.78783997272921
MMV_Model4	FCFP_6	SciTegic.value.IntegerFingerprintValue	G608	36492900	140	16696426	12	12	1.787118050246
MMV_Model4	FCFP_6	SciTegic.value.IntegerFingerprintValue	G609	1316670154	21	16696426	6	6	1.78335604797814
MMV_Model4	FCFP_6	SciTegic.value.IntegerFingerprintValue	G610	-174205015	21	16696426	6	6	1.78335604797814
MMV_Model4	FCFP_6	SciTegic.value.IntegerFingerprintValue	G611	285356395	41	16696426	7	7	1.78333113552449
MMV_Model4	FCFP_6	SciTegic.value.IntegerFingerprintValue	G612	-1079207940	81	16696426	9	9	1.78329625913201
MMV_Model4	FCFP_6	SciTegic.value.IntegerFingerprintValue	G613	-288002208	81	16696426	9	9	1.78329625913201
MMV_Model4	FCFP_6	SciTegic.value.IntegerFingerprintValue	G614	-971774734	161	16696426	13	13	1.78325640188712
MMV_Model4	FCFP_6	SciTegic.value.IntegerFingerprintValue	G615	-650476938	343	16696426	22	22	1.77887874849389
MMV_Model4	FCFP_6	SciTegic.value.IntegerFingerprintValue	G616	-1542035148	82	16696426	9	9	1.77830802357575
MMV_Model4	FCFP_6	SciTegic.value.IntegerFingerprintValue	G617	-2082914041	42	16696426	7	7	1.77709950263777
MMV_Model4	FCFP_6	SciTegic.value.IntegerFingerprintValue	G618	-1861407456	22	16696426	6	6	1.77623716672012
MMV_Model4	FCFP_6	SciTegic.value.IntegerFingerprintValue	G619	1646938464	22	16696426	6	6	1.77623716672012
MMV_Model4	FCFP_6	SciTegic.value.IntegerFingerprintValue	G620	214102652	63	16696426	8	8	1.77226022005418
MMV_Model4	FCFP_6	SciTegic.value.IntegerFingerprintValue	G621	508137946	23	16696426	6	6	1.76916860591812
MMV_Model4	FCFP_6	SciTegic.value.IntegerFingerprintValue	G622	-1088743145	23	16696426	6	6	1.76916860591812
MMV_Model4	FCFP_6	SciTegic.value.IntegerFingerprintValue	G623	-2087512439	23	16696426	6	6	1.76916860591812
MMV_Model4	FCFP_6	SciTegic.value.IntegerFingerprintValue	G624	-1713056329	125	16696426	11	11	1.76674180119378
MMV_Model4	FCFP_6	SciTegic.value.IntegerFingerprintValue	G625	-1560899412	187	16696426	14	14	1.76344530838727
MMV_Model4	FCFP_6	SciTegic.value.IntegerFingerprintValue	G626	1389536147	187	16696426	14	14	1.76344530838727
MMV_Model4	FCFP_6	SciTegic.value.IntegerFingerprintValue	G627	-1963365767	330	16696426	21	21	1.76297073763932
MMV_Model4	FCFP_6	SciTegic.value.IntegerFingerprintValue	G628	-711064308	126	16696426	11	11	1.76265134923234
MMV_Model4	FCFP_6	SciTegic.value.IntegerFingerprintValue	G629	1520922748	126	16696426	11	11	1.76265134923234
MMV_Model4	FCFP_6	SciTegic.value.IntegerFingerprintValue	G630	-1710777996	126	16696426	11	11	1.76265134923234
MMV_Model4	FCFP_6	SciTegic.value.IntegerFingerprintValue	G631	-2074118525	45	16696426	7	7	1.7586342696504
MMV_Model4	FCFP_6	SciTegic.value.IntegerFingerprintValue	G632	-2060854799	168	16696426	13	13	1.75856135902832
MMV_Model4	FCFP_6	SciTegic.value.IntegerFingerprintValue	G633	-7535681	189	16696426	14	14	1.75693003532654
MMV_Model4	FCFP_6	SciTegic.value.IntegerFingerprintValue	G634	-1181077348	66	16696426	8	8	1.75590859607305
MMV_Model4	FCFP_6	SciTegic.value.IntegerFingerprintValue	G635	-2133429198	25	16696426	6	6	1.75517963485699
MMV_Model4	FCFP_6	SciTegic.value.IntegerFingerprintValue	G636	-630338959	87	16696426	9	9	1.75373339370055
MMV_Model4	FCFP_6	SciTegic.value.IntegerFingerprintValue	G637	2052606465	87	16696426	9	9	1.75373339370055
MMV_Model4	FCFP_6	SciTegic.value.IntegerFingerprintValue	G638	-81309113	87	16696426	9	9	1.75373339370055
MMV_Model4	FCFP_6	SciTegic.value.IntegerFingerprintValue	G639	611363946	87	16696426	9	9	1.75373339370055
MMV_Model4	FCFP_6	SciTegic.value.IntegerFingerprintValue	G640	-384066550	87	16696426	9	9	1.75373339370055
MMV_Model4	FCFP_6	SciTegic.value.IntegerFingerprintValue	G641	-639499186	87	16696426	9	9	1.75373339370055
MMV_Model4	FCFP_6	SciTegic.value.IntegerFingerprintValue	G642	2018542916	87	16696426	9	9	1.75373339370055
MMV_Model4	FCFP_6	SciTegic.value.IntegerFingerprintValue	G643	1237732457	479	16696426	28	28	1.75264076646223
MMV_Model4	FCFP_6	SciTegic.value.IntegerFingerprintValue	G644	-1734998689	5	16696426	5	5	1.75059194188733
MMV_Model4	FCFP_6	SciTegic.value.IntegerFingerprintValue	G645	-1316661276	5	16696426	5	5	1.75059194188733
MMV_Model4	FCFP_6	SciTegic.value.IntegerFingerprintValue	G646	730141221	5	16696426	5	5	1.75059194188733
MMV_Model4	FCFP_6	SciTegic.value.IntegerFingerprintValue	G647	1094369523	5	16696426	5	5	1.75059194188733
MMV_Model4	FCFP_6	SciTegic.value.IntegerFingerprintValue	G648	-729407407	5	16696426	5	5	1.75059194188733
MMV_Model4	FCFP_6	SciTegic.value.IntegerFingerprintValue	G649	601051505	5	16696426	5	5	1.75059194188733
MMV_Model4	FCFP_6	SciTegic.value.IntegerFingerprintValue	G650	873975700	5	16696426	5	5	1.75059194188733
MMV_Model4	FCFP_6	SciTegic.value.IntegerFingerprintValue	G651	-1079841988	5	16696426	5	5	1.75059194188733
MMV_Model4	FCFP_6	SciTegic.value.IntegerFingerprintValue	G652	566793597	5	16696426	5	5	1.75059194188733
MMV_Model4	FCFP_6	SciTegic.value.IntegerFingerprintValue	G653	904737379	5	16696426	5	5	1.75059194188733
MMV_Model4	FCFP_6	SciTegic.value.IntegerFingerprintValue	G654	-453196745	5	16696426	5	5	1.75059194188733
MMV_Model4	FCFP_6	SciTegic.value.IntegerFingerprintValue	G655	-735280552	5	16696426	5	5	1.75059194188733
MMV_Model4	FCFP_6	SciTegic.value.IntegerFingerprintValue	G656	-426319149	5	16696426	5	5	1.75059194188733
MMV_Model4	FCFP_6	SciTegic.value.IntegerFingerprintValue	G657	1396250741	5	16696426	5	5	1.75059194188733
MMV_Model4	FCFP_6	SciTegic.value.IntegerFingerprintValue	G658	-992347803	5	16696426	5	5	1.75059194188733
MMV_Model4	FCFP_6	SciTegic.value.IntegerFingerprintValue	G659	1383960757	5	16696426	5	5	1.75059194188733
MMV_Model4	FCFP_6	SciTegic.value.IntegerFingerprintValue	G660	260438879	5	16696426	5	5	1.75059194188733
MMV_Model4	FCFP_6	SciTegic.value.IntegerFingerprintValue	G661	-72710418	5	16696426	5	5	1.75059194188733
MMV_Model4	FCFP_6	SciTegic.value.IntegerFingerprintValue	G662	-159311025	5	16696426	5	5	1.75059194188733
MMV_Model4	FCFP_6	SciTegic.value.IntegerFingerprintValue	G663	655700453	5	16696426	5	5	1.75059194188733
MMV_Model4	FCFP_6	SciTegic.value.IntegerFingerprintValue	G664	-1296080627	129	16696426	11	11	1.75047943606633
MMV_Model4	FCFP_6	SciTegic.value.IntegerFingerprintValue	G665	203151256	150	16696426	12	12	1.74923072785331
MMV_Model4	FCFP_6	SciTegic.value.IntegerFingerprintValue	G666	1081447491	504	16696426	29	29	1.74558468122274
MMV_Model4	FCFP_6	SciTegic.value.IntegerFingerprintValue	G667	-788658159	442	16696426	26	26	1.74505472779821
MMV_Model4	FCFP_6	SciTegic.value.IntegerFingerprintValue	G668	-34959474	89	16696426	9	9	1.74407018048785
MMV_Model4	FCFP_6	SciTegic.value.IntegerFingerprintValue	G669	-975219586	714	16696426	39	39	1.74276834126503
MMV_Model4	FCFP_6	SciTegic.value.IntegerFingerprintValue	G670	1382997088	6	16696426	5	5	1.74255796999728
MMV_Model4	FCFP_6	SciTegic.value.IntegerFingerprintValue	G671	356071785	6	16696426	5	5	1.74255796999728
MMV_Model4	FCFP_6	SciTegic.value.IntegerFingerprintValue	G672	1211603559	6	16696426	5	5	1.74255796999728
MMV_Model4	FCFP_6	SciTegic.value.IntegerFingerprintValue	G673	-1229398894	6	16696426	5	5	1.74255796999728
MMV_Model4	FCFP_6	SciTegic.value.IntegerFingerprintValue	G674	-528564168	6	16696426	5	5	1.74255796999728
MMV_Model4	FCFP_6	SciTegic.value.IntegerFingerprintValue	G675	-1344827167	6	16696426	5	5	1.74255796999728
MMV_Model4	FCFP_6	SciTegic.value.IntegerFingerprintValue	G676	2106841741	6	16696426	5	5	1.74255796999728
MMV_Model4	FCFP_6	SciTegic.value.IntegerFingerprintValue	G677	585668581	6	16696426	5	5	1.74255796999728
MMV_Model4	FCFP_6	SciTegic.value.IntegerFingerprintValue	G678	2121553597	6	16696426	5	5	1.74255796999728
MMV_Model4	FCFP_6	SciTegic.value.IntegerFingerprintValue	G679	382349880	6	16696426	5	5	1.74255796999728
MMV_Model4	FCFP_6	SciTegic.value.IntegerFingerprintValue	G680	-58347962	6	16696426	5	5	1.74255796999728
MMV_Model4	FCFP_6	SciTegic.value.IntegerFingerprintValue	G681	-1291027384	6	16696426	5	5	1.74255796999728
MMV_Model4	FCFP_6	SciTegic.value.IntegerFingerprintValue	G682	100274749	6	16696426	5	5	1.74255796999728
MMV_Model4	FCFP_6	SciTegic.value.IntegerFingerprintValue	G683	-453826387	48	16696426	7	7	1.74050382881724
MMV_Model4	FCFP_6	SciTegic.value.IntegerFingerprintValue	G684	-1382297419	236	16696426	16	16	1.74006317930125
MMV_Model4	FCFP_6	SciTegic.value.IntegerFingerprintValue	G685	-587539325	342	16696426	21	21	1.73659396499772
MMV_Model4	FCFP_6	SciTegic.value.IntegerFingerprintValue	G686	-1254724231	7	16696426	5	5	1.73458802873298
MMV_Model4	FCFP_6	SciTegic.value.IntegerFingerprintValue	G687	1885150547	7	16696426	5	5	1.73458802873298
MMV_Model4	FCFP_6	SciTegic.value.IntegerFingerprintValue	G688	1676469903	7	16696426	5	5	1.73458802873298
MMV_Model4	FCFP_6	SciTegic.value.IntegerFingerprintValue	G689	799900429	7	16696426	5	5	1.73458802873298
MMV_Model4	FCFP_6	SciTegic.value.IntegerFingerprintValue	G690	94360125	7	16696426	5	5	1.73458802873298
MMV_Model4	FCFP_6	SciTegic.value.IntegerFingerprintValue	G691	2116056719	7	16696426	5	5	1.73458802873298
MMV_Model4	FCFP_6	SciTegic.value.IntegerFingerprintValue	G692	-1105907284	7	16696426	5	5	1.73458802873298
MMV_Model4	FCFP_6	SciTegic.value.IntegerFingerprintValue	G693	-226319305	7	16696426	5	5	1.73458802873298
MMV_Model4	FCFP_6	SciTegic.value.IntegerFingerprintValue	G694	-1712017254	7	16696426	5	5	1.73458802873298
MMV_Model4	FCFP_6	SciTegic.value.IntegerFingerprintValue	G695	2001678408	28	16696426	6	6	1.73455639327699
MMV_Model4	FCFP_6	SciTegic.value.IntegerFingerprintValue	G696	-1561515064	28	16696426	6	6	1.73455639327699
MMV_Model4	FCFP_6	SciTegic.value.IntegerFingerprintValue	G697	-2071477346	28	16696426	6	6	1.73455639327699
MMV_Model4	FCFP_6	SciTegic.value.IntegerFingerprintValue	G698	1292549667	49	16696426	7	7	1.73453266734176
MMV_Model4	FCFP_6	SciTegic.value.IntegerFingerprintValue	G699	-1829086001	70	16696426	8	8	1.73451421422575
MMV_Model4	FCFP_6	SciTegic.value.IntegerFingerprintValue	G700	817146757	175	16696426	13	13	1.73446149291339
MMV_Model4	FCFP_6	SciTegic.value.IntegerFingerprintValue	G701	-763362927	1481	16696426	75	75	1.73188090694875
MMV_Model4	FCFP_6	SciTegic.value.IntegerFingerprintValue	G702	1846017712	50	16696426	7	7	1.72859694910304
MMV_Model4	FCFP_6	SciTegic.value.IntegerFingerprintValue	G703	701261271	8	16696426	5	5	1.72668110551325
MMV_Model4	FCFP_6	SciTegic.value.IntegerFingerprintValue	G704	1848058168	8	16696426	5	5	1.72668110551325
MMV_Model4	FCFP_6	SciTegic.value.IntegerFingerprintValue	G705	-1629574332	8	16696426	5	5	1.72668110551325
MMV_Model4	FCFP_6	SciTegic.value.IntegerFingerprintValue	G706	621540320	8	16696426	5	5	1.72668110551325
MMV_Model4	FCFP_6	SciTegic.value.IntegerFingerprintValue	G707	-137085366	8	16696426	5	5	1.72668110551325
MMV_Model4	FCFP_6	SciTegic.value.IntegerFingerprintValue	G708	854463211	8	16696426	5	5	1.72668110551325
MMV_Model4	FCFP_6	SciTegic.value.IntegerFingerprintValue	G709	-1209623258	8	16696426	5	5	1.72668110551325
MMV_Model4	FCFP_6	SciTegic.value.IntegerFingerprintValue	G710	1347011452	8	16696426	5	5	1.72668110551325
MMV_Model4	FCFP_6	SciTegic.value.IntegerFingerprintValue	G711	-693213551	8	16696426	5	5	1.72668110551325
MMV_Model4	FCFP_6	SciTegic.value.IntegerFingerprintValue	G712	1394941598	8	16696426	5	5	1.72668110551325
MMV_Model4	FCFP_6	SciTegic.value.IntegerFingerprintValue	G713	2121988734	8	16696426	5	5	1.72668110551325
MMV_Model4	FCFP_6	SciTegic.value.IntegerFingerprintValue	G714	1447550979	8	16696426	5	5	1.72668110551325
MMV_Model4	FCFP_6	SciTegic.value.IntegerFingerprintValue	G715	324528343	8	16696426	5	5	1.72668110551325
MMV_Model4	FCFP_6	SciTegic.value.IntegerFingerprintValue	G716	-926499350	8	16696426	5	5	1.72668110551325
MMV_Model4	FCFP_6	SciTegic.value.IntegerFingerprintValue	G717	-1355281478	93	16696426	9	9	1.72501945463522
MMV_Model4	FCFP_6	SciTegic.value.IntegerFingerprintValue	G718	-1896158289	30	16696426	6	6	1.72104012633185
MMV_Model4	FCFP_6	SciTegic.value.IntegerFingerprintValue	G719	-1082352571	94	16696426	9	9	1.72031294573089
MMV_Model4	FCFP_6	SciTegic.value.IntegerFingerprintValue	G720	-447003550	222	16696426	15	15	1.71967709619048
MMV_Model4	FCFP_6	SciTegic.value.IntegerFingerprintValue	G721	1524681563	9	16696426	5	5	1.7188362115881
MMV_Model4	FCFP_6	SciTegic.value.IntegerFingerprintValue	G722	-461565519	9	16696426	5	5	1.7188362115881
MMV_Model4	FCFP_6	SciTegic.value.IntegerFingerprintValue	G723	1809051215	9	16696426	5	5	1.7188362115881
MMV_Model4	FCFP_6	SciTegic.value.IntegerFingerprintValue	G724	1293778554	6310	16696426	300	300	1.717429359098
MMV_Model4	FCFP_6	SciTegic.value.IntegerFingerprintValue	G725	-1467581661	202	16696426	14	14	1.71558502674604
MMV_Model4	FCFP_6	SciTegic.value.IntegerFingerprintValue	G726	-257585016	31	16696426	6	6	1.71434988977201
MMV_Model4	FCFP_6	SciTegic.value.IntegerFingerprintValue	G727	1757687282	74	16696426	8	8	1.71356798082941
MMV_Model4	FCFP_6	SciTegic.value.IntegerFingerprintValue	G728	-71227932	117	16696426	10	10	1.71307072054561
MMV_Model4	FCFP_6	SciTegic.value.IntegerFingerprintValue	G729	1546877526	10	16696426	5	5	1.71105238129663
MMV_Model4	FCFP_6	SciTegic.value.IntegerFingerprintValue	G730	1091247686	10	16696426	5	5	1.71105238129663
MMV_Model4	FCFP_6	SciTegic.value.IntegerFingerprintValue	G731	-2053074435	10	16696426	5	5	1.71105238129663
MMV_Model4	FCFP_6	SciTegic.value.IntegerFingerprintValue	G732	-1345299940	10	16696426	5	5	1.71105238129663
MMV_Model4	FCFP_6	SciTegic.value.IntegerFingerprintValue	G733	1804983773	10	16696426	5	5	1.71105238129663
MMV_Model4	FCFP_6	SciTegic.value.IntegerFingerprintValue	G734	-77921131	10	16696426	5	5	1.71105238129663
MMV_Model4	FCFP_6	SciTegic.value.IntegerFingerprintValue	G735	1191210686	10	16696426	5	5	1.71105238129663
MMV_Model4	FCFP_6	SciTegic.value.IntegerFingerprintValue	G736	539399495	10	16696426	5	5	1.71105238129663
MMV_Model4	FCFP_6	SciTegic.value.IntegerFingerprintValue	G737	1125740753	10	16696426	5	5	1.71105238129663
MMV_Model4	FCFP_6	SciTegic.value.IntegerFingerprintValue	G738	1389909526	139	16696426	11	11	1.71094423687375
MMV_Model4	FCFP_6	SciTegic.value.IntegerFingerprintValue	G739	-984808554	786	16696426	41	41	1.70865453945938
MMV_Model4	FCFP_6	SciTegic.value.IntegerFingerprintValue	G740	1393998789	248	16696426	16	16	1.7068165510732
MMV_Model4	FCFP_6	SciTegic.value.IntegerFingerprintValue	G741	1285154013	356	16696426	21	21	1.70667542029681
MMV_Model4	FCFP_6	SciTegic.value.IntegerFingerprintValue	G742	-2036796761	205	16696426	14	14	1.70628182933153
MMV_Model4	FCFP_6	SciTegic.value.IntegerFingerprintValue	G743	-2050748765	205	16696426	14	14	1.70628182933153
MMV_Model4	FCFP_6	SciTegic.value.IntegerFingerprintValue	G744	549801150	11	16696426	5	5	1.70332867135379
MMV_Model4	FCFP_6	SciTegic.value.IntegerFingerprintValue	G745	-146995053	11	16696426	5	5	1.70332867135379
MMV_Model4	FCFP_6	SciTegic.value.IntegerFingerprintValue	G746	-1237267304	33	16696426	6	6	1.70110221548771
MMV_Model4	FCFP_6	SciTegic.value.IntegerFingerprintValue	G747	334646965	12	16696426	5	5	1.69566416016426
MMV_Model4	FCFP_6	SciTegic.value.IntegerFingerprintValue	G748	-1850146685	12	16696426	5	5	1.69566416016426
MMV_Model4	FCFP_6	SciTegic.value.IntegerFingerprintValue	G749	-255277917	34	16696426	6	6	1.69454361517203
MMV_Model4	FCFP_6	SciTegic.value.IntegerFingerprintValue	G750	-250950066	34	16696426	6	6	1.69454361517203
MMV_Model4	FCFP_6	SciTegic.value.IntegerFingerprintValue	G751	-1828502130	78	16696426	8	8	1.69305150569975
MMV_Model4	FCFP_6	SciTegic.value.IntegerFingerprintValue	G752	1208401815	78	16696426	8	8	1.69305150569975
MMV_Model4	FCFP_6	SciTegic.value.IntegerFingerprintValue	G753	215259150	78	16696426	8	8	1.69305150569975
MMV_Model4	FCFP_6	SciTegic.value.IntegerFingerprintValue	G754	1555474968	188	16696426	13	13	1.69118949428146
MMV_Model4	FCFP_6	SciTegic.value.IntegerFingerprintValue	G755	1134454081	35	16696426	6	6	1.68802774996415
MMV_Model4	FCFP_6	SciTegic.value.IntegerFingerprintValue	G756	-988097375	79	16696426	8	8	1.68798748845128
MMV_Model4	FCFP_6	SciTegic.value.IntegerFingerprintValue	G757	1217313287	79	16696426	8	8	1.68798748845128
MMV_Model4	FCFP_6	SciTegic.value.IntegerFingerprintValue	G758	1393647373	79	16696426	8	8	1.68798748845128
MMV_Model4	FCFP_6	SciTegic.value.IntegerFingerprintValue	G759	-1586109105	761	16696426	39	39	1.6878782872587
MMV_Model4	FCFP_6	SciTegic.value.IntegerFingerprintValue	G760	1557075936	850	16696426	43	43	1.68684285092135
MMV_Model4	FCFP_6	SciTegic.value.IntegerFingerprintValue	G761	-1577773108	366	16696426	21	21	1.68584012239637
MMV_Model4	FCFP_6	SciTegic.value.IntegerFingerprintValue	G762	638354709	58	16696426	7	7	1.68233846948262
MMV_Model4	FCFP_6	SciTegic.value.IntegerFingerprintValue	G763	546833170	701	16696426	36	36	1.68053663265254
MMV_Model4	FCFP_6	SciTegic.value.IntegerFingerprintValue	G764	-541448083	14	16696426	5	5	1.68050915217827
MMV_Model4	FCFP_6	SciTegic.value.IntegerFingerprintValue	G765	-1071543282	14	16696426	5	5	1.68050915217827
MMV_Model4	FCFP_6	SciTegic.value.IntegerFingerprintValue	G766	406998800	14	16696426	5	5	1.68050915217827
MMV_Model4	FCFP_6	SciTegic.value.IntegerFingerprintValue	G767	1057874498	14	16696426	5	5	1.68050915217827
MMV_Model4	FCFP_6	SciTegic.value.IntegerFingerprintValue	G768	-1528873112	14	16696426	5	5	1.68050915217827
MMV_Model4	FCFP_6	SciTegic.value.IntegerFingerprintValue	G769	-1868709610	103	16696426	9	9	1.67892241926811
MMV_Model4	FCFP_6	SciTegic.value.IntegerFingerprintValue	G770	1789113872	81	16696426	8	8	1.67793574347418
MMV_Model4	FCFP_6	SciTegic.value.IntegerFingerprintValue	G771	1177079623	59	16696426	7	7	1.67670376618318
MMV_Model4	FCFP_6	SciTegic.value.IntegerFingerprintValue	G772	1055922479	59	16696426	7	7	1.67670376618318
MMV_Model4	FCFP_6	SciTegic.value.IntegerFingerprintValue	G773	-1139934050	59	16696426	7	7	1.67670376618318
MMV_Model4	FCFP_6	SciTegic.value.IntegerFingerprintValue	G774	-1706448264	15	16696426	5	5	1.67301691482424
MMV_Model4	FCFP_6	SciTegic.value.IntegerFingerprintValue	G775	279933184	15	16696426	5	5	1.67301691482424
MMV_Model4	FCFP_6	SciTegic.value.IntegerFingerprintValue	G776	-1993494348	15	16696426	5	5	1.67301691482424
MMV_Model4	FCFP_6	SciTegic.value.IntegerFingerprintValue	G777	1833006426	15	16696426	5	5	1.67301691482424
MMV_Model4	FCFP_6	SciTegic.value.IntegerFingerprintValue	G778	-227869282	15	16696426	5	5	1.67301691482424
MMV_Model4	FCFP_6	SciTegic.value.IntegerFingerprintValue	G779	-1015717573	15	16696426	5	5	1.67301691482424
MMV_Model4	FCFP_6	SciTegic.value.IntegerFingerprintValue	G780	-979225364	15	16696426	5	5	1.67301691482424
MMV_Model4	FCFP_6	SciTegic.value.IntegerFingerprintValue	G781	-1471497317	15	16696426	5	5	1.67301691482424
MMV_Model4	FCFP_6	SciTegic.value.IntegerFingerprintValue	G782	-1023821598	149	16696426	11	11	1.67291280627118
MMV_Model4	FCFP_6	SciTegic.value.IntegerFingerprintValue	G783	-1618117374	60	16696426	7	7	1.67110063494885
MMV_Model4	FCFP_6	SciTegic.value.IntegerFingerprintValue	G784	1227457690	60	16696426	7	7	1.67110063494885
MMV_Model4	FCFP_6	SciTegic.value.IntegerFingerprintValue	G785	-833462246	16	16696426	5	5	1.66558039390869
MMV_Model4	FCFP_6	SciTegic.value.IntegerFingerprintValue	G786	-1177143231	16	16696426	5	5	1.66558039390869
MMV_Model4	FCFP_6	SciTegic.value.IntegerFingerprintValue	G787	-1456526299	16	16696426	5	5	1.66558039390869
MMV_Model4	FCFP_6	SciTegic.value.IntegerFingerprintValue	G788	-358719863	264	16696426	16	16	1.66414023423697
MMV_Model4	FCFP_6	SciTegic.value.IntegerFingerprintValue	G789	1626791544	84	16696426	8	8	1.66304506935984
MMV_Model4	FCFP_6	SciTegic.value.IntegerFingerprintValue	G790	478233136	84	16696426	8	8	1.66304506935984
MMV_Model4	FCFP_6	SciTegic.value.IntegerFingerprintValue	G791	1396895127	84	16696426	8	8	1.66304506935984
MMV_Model4	FCFP_6	SciTegic.value.IntegerFingerprintValue	G792	-13552013	39	16696426	6	6	1.66238073251437
MMV_Model4	FCFP_6	SciTegic.value.IntegerFingerprintValue	G793	-1306766227	175	16696426	12	12	1.66035352075967
MMV_Model4	FCFP_6	SciTegic.value.IntegerFingerprintValue	G794	-294325664	17	16696426	5	5	1.65819876686812
MMV_Model4	FCFP_6	SciTegic.value.IntegerFingerprintValue	G795	2044818915	17	16696426	5	5	1.65819876686812
MMV_Model4	FCFP_6	SciTegic.value.IntegerFingerprintValue	G796	593830742	493	16696426	26	26	1.65803920671095
MMV_Model4	FCFP_6	SciTegic.value.IntegerFingerprintValue	G797	-1469487811	199	16696426	13	13	1.65598271554579
MMV_Model4	FCFP_6	SciTegic.value.IntegerFingerprintValue	G798	-711172610	132	16696426	10	10	1.65144252149535
MMV_Model4	FCFP_6	SciTegic.value.IntegerFingerprintValue	G799	505375481	132	16696426	10	10	1.65144252149535
MMV_Model4	FCFP_6	SciTegic.value.IntegerFingerprintValue	G800	1832184229	132	16696426	10	10	1.65144252149535
MMV_Model4	FCFP_6	SciTegic.value.IntegerFingerprintValue	G801	301369989	18	16696426	5	5	1.6508712292214
MMV_Model4	FCFP_6	SciTegic.value.IntegerFingerprintValue	G802	-1748394506	498	16696426	26	26	1.64990209590969
MMV_Model4	FCFP_6	SciTegic.value.IntegerFingerprintValue	G803	-895632959	41	16696426	6	6	1.64979974289997
MMV_Model4	FCFP_6	SciTegic.value.IntegerFingerprintValue	G804	-288367815	110	16696426	9	9	1.6478739559457
MMV_Model4	FCFP_6	SciTegic.value.IntegerFingerprintValue	G805	1122741451	846	16696426	41	41	1.64445946517515
MMV_Model4	FCFP_6	SciTegic.value.IntegerFingerprintValue	G806	829912265	19	16696426	5	5	1.64359699404355
MMV_Model4	FCFP_6	SciTegic.value.IntegerFingerprintValue	G807	-1539748556	19	16696426	5	5	1.64359699404355
MMV_Model4	FCFP_6	SciTegic.value.IntegerFingerprintValue	G808	1743571533	19	16696426	5	5	1.64359699404355
MMV_Model4	FCFP_6	SciTegic.value.IntegerFingerprintValue	G809	-983075778	42	16696426	6	6	1.64356811001325
MMV_Model4	FCFP_6	SciTegic.value.IntegerFingerprintValue	G810	-794234189	111	16696426	9	9	1.64351612086102
MMV_Model4	FCFP_6	SciTegic.value.IntegerFingerprintValue	G811	-678276158	157	16696426	11	11	1.6434959035873
MMV_Model4	FCFP_6	SciTegic.value.IntegerFingerprintValue	G812	1968778861	249	16696426	15	15	1.64347063256992
MMV_Model4	FCFP_6	SciTegic.value.IntegerFingerprintValue	G813	1652228493	43	16696426	6	6	1.63737507000245
MMV_Model4	FCFP_6	SciTegic.value.IntegerFingerprintValue	G814	1358568378	20	16696426	5	5	1.63637529145866
MMV_Model4	FCFP_6	SciTegic.value.IntegerFingerprintValue	G815	965450812	20	16696426	5	5	1.63637529145866
MMV_Model4	FCFP_6	SciTegic.value.IntegerFingerprintValue	G816	1763778629	20	16696426	5	5	1.63637529145866
MMV_Model4	FCFP_6	SciTegic.value.IntegerFingerprintValue	G817	-1903974649	20	16696426	5	5	1.63637529145866
MMV_Model4	FCFP_6	SciTegic.value.IntegerFingerprintValue	G818	1669235889	486	16696426	25	25	1.63180323063924
MMV_Model4	FCFP_6	SciTegic.value.IntegerFingerprintValue	G819	-1459251632	44	16696426	6	6	1.63122014779224
MMV_Model4	FCFP_6	SciTegic.value.IntegerFingerprintValue	G820	1503427524	21	16696426	5	5	1.62920536815088
MMV_Model4	FCFP_6	SciTegic.value.IntegerFingerprintValue	G821	-1969925236	21	16696426	5	5	1.62920536815088
MMV_Model4	FCFP_6	SciTegic.value.IntegerFingerprintValue	G822	-2031639255	45	16696426	6	6	1.62510287702588
MMV_Model4	FCFP_6	SciTegic.value.IntegerFingerprintValue	G823	-844018618	92	16696426	8	8	1.6243877038972
MMV_Model4	FCFP_6	SciTegic.value.IntegerFingerprintValue	G824	612690104	92	16696426	8	8	1.6243877038972
MMV_Model4	FCFP_6	SciTegic.value.IntegerFingerprintValue	G825	-1624759978	92	16696426	8	8	1.6243877038972
MMV_Model4	FCFP_6	SciTegic.value.IntegerFingerprintValue	G826	-731224312	866	16696426	41	41	1.62394533834993
MMV_Model4	FCFP_6	SciTegic.value.IntegerFingerprintValue	G827	212568403	22	16696426	5	5	1.62208648689286
MMV_Model4	FCFP_6	SciTegic.value.IntegerFingerprintValue	G828	171877797	69	16696426	7	7	1.6220370160311
MMV_Model4	FCFP_6	SciTegic.value.IntegerFingerprintValue	G829	-1378931683	69	16696426	7	7	1.6220370160311
MMV_Model4	FCFP_6	SciTegic.value.IntegerFingerprintValue	G830	-320520743	258	16696426	15	15	1.61930657345468
MMV_Model4	FCFP_6	SciTegic.value.IntegerFingerprintValue	G831	1672204115	164	16696426	11	11	1.61844737132007
MMV_Model4	FCFP_6	SciTegic.value.IntegerFingerprintValue	G832	789550541	401	16696426	21	21	1.61615633006914
MMV_Model4	FCFP_6	SciTegic.value.IntegerFingerprintValue	G833	104202270	378	16696426	20	20	1.61487758273364
MMV_Model4	FCFP_6	SciTegic.value.IntegerFingerprintValue	G834	-701256449	190	16696426	12	12	1.61058740461604
MMV_Model4	FCFP_6	SciTegic.value.IntegerFingerprintValue	G835	-1949637151	167	16696426	11	11	1.60790142403816
MMV_Model4	FCFP_6	SciTegic.value.IntegerFingerprintValue	G836	-583136051	191	16696426	12	12	1.60735609278028
MMV_Model4	FCFP_6	SciTegic.value.IntegerFingerprintValue	G837	-224506018	48	16696426	6	6	1.60697243619271
MMV_Model4	FCFP_6	SciTegic.value.IntegerFingerprintValue	G838	2143056717	48	16696426	6	6	1.60697243619271
MMV_Model4	FCFP_6	SciTegic.value.IntegerFingerprintValue	G839	-678027662	96	16696426	8	8	1.60560534916491
MMV_Model4	FCFP_6	SciTegic.value.IntegerFingerprintValue	G840	440639681	862	16696426	40	40	1.60391708386124
MMV_Model4	FCFP_6	SciTegic.value.IntegerFingerprintValue	G841	76085739	264	16696426	15	15	1.60351561242054
MMV_Model4	FCFP_6	SciTegic.value.IntegerFingerprintValue	G842	89901469	25	16696426	5	5	1.60102895502974
MMV_Model4	FCFP_6	SciTegic.value.IntegerFingerprintValue	G843	-1817688081	25	16696426	5	5	1.60102895502974
MMV_Model4	FCFP_6	SciTegic.value.IntegerFingerprintValue	G844	-579827050	25	16696426	5	5	1.60102895502974
MMV_Model4	FCFP_6	SciTegic.value.IntegerFingerprintValue	G845	1463758739	73	16696426	7	7	1.60098051498567
MMV_Model4	FCFP_6	SciTegic.value.IntegerFingerprintValue	G846	-365297847	97	16696426	8	8	1.60096436882573
MMV_Model4	FCFP_6	SciTegic.value.IntegerFingerprintValue	G847	1943562104	97	16696426	8	8	1.60096436882573
MMV_Model4	FCFP_6	SciTegic.value.IntegerFingerprintValue	G848	510133445	193	16696426	12	12	1.60092462554266
MMV_Model4	FCFP_6	SciTegic.value.IntegerFingerprintValue	G849	-1139696770	122	16696426	9	9	1.59679295957215
MMV_Model4	FCFP_6	SciTegic.value.IntegerFingerprintValue	G850	1283849631	98	16696426	8	8	1.59634482772428
MMV_Model4	FCFP_6	SciTegic.value.IntegerFingerprintValue	G851	-451660150	870	16696426	40	40	1.59579498177077
MMV_Model4	FCFP_6	SciTegic.value.IntegerFingerprintValue	G852	415618614	50	16696426	6	6	1.59506555647852
MMV_Model4	FCFP_6	SciTegic.value.IntegerFingerprintValue	G853	980469684	26	16696426	5	5	1.59410717587661
MMV_Model4	FCFP_6	SciTegic.value.IntegerFingerprintValue	G854	68854626	26	16696426	5	5	1.59410717587661
MMV_Model4	FCFP_6	SciTegic.value.IntegerFingerprintValue	G855	-698903831	5627	16696426	236	236	1.59069479586972
MMV_Model4	FCFP_6	SciTegic.value.IntegerFingerprintValue	G856	232069902	75	16696426	7	7	1.59061622984183
MMV_Model4	FCFP_6	SciTegic.value.IntegerFingerprintValue	G857	1492713973	27	16696426	5	5	1.58723297858765
MMV_Model4	FCFP_6	SciTegic.value.IntegerFingerprintValue	G858	2006871518	222	16696426	13	13	1.58614570356596
MMV_Model4	FCFP_6	SciTegic.value.IntegerFingerprintValue	G859	1933071572	929	16696426	42	42	1.58547690946798
MMV_Model4	FCFP_6	SciTegic.value.IntegerFingerprintValue	G860	1227821624	76	16696426	7	7	1.58547409281201
MMV_Model4	FCFP_6	SciTegic.value.IntegerFingerprintValue	G861	273950788	393	16696426	20	20	1.5851413392588
MMV_Model4	FCFP_6	SciTegic.value.IntegerFingerprintValue	G862	-949396263	393	16696426	20	20	1.5851413392588
MMV_Model4	FCFP_6	SciTegic.value.IntegerFingerprintValue	G863	-1406370512	393	16696426	20	20	1.5851413392588
MMV_Model4	FCFP_6	SciTegic.value.IntegerFingerprintValue	G864	-1522767750	28	16696426	5	5	1.58040571344973
MMV_Model4	FCFP_6	SciTegic.value.IntegerFingerprintValue	G865	289171025	28	16696426	5	5	1.58040571344973
MMV_Model4	FCFP_6	SciTegic.value.IntegerFingerprintValue	G866	-1407447666	77	16696426	7	7	1.58035826214217
MMV_Model4	FCFP_6	SciTegic.value.IntegerFingerprintValue	G867	-2118486056	4	16696426	4	4	1.57636942479352
MMV_Model4	FCFP_6	SciTegic.value.IntegerFingerprintValue	G868	-803627426	4	16696426	4	4	1.57636942479352
MMV_Model4	FCFP_6	SciTegic.value.IntegerFingerprintValue	G869	-1400033648	4	16696426	4	4	1.57636942479352
MMV_Model4	FCFP_6	SciTegic.value.IntegerFingerprintValue	G870	-2947257	4	16696426	4	4	1.57636942479352
MMV_Model4	FCFP_6	SciTegic.value.IntegerFingerprintValue	G871	-1658086276	4	16696426	4	4	1.57636942479352
MMV_Model4	FCFP_6	SciTegic.value.IntegerFingerprintValue	G872	868485364	4	16696426	4	4	1.57636942479352
MMV_Model4	FCFP_6	SciTegic.value.IntegerFingerprintValue	G873	584278241	4	16696426	4	4	1.57636942479352
MMV_Model4	FCFP_6	SciTegic.value.IntegerFingerprintValue	G874	-1654491516	4	16696426	4	4	1.57636942479352
MMV_Model4	FCFP_6	SciTegic.value.IntegerFingerprintValue	G875	1938572844	4	16696426	4	4	1.57636942479352
MMV_Model4	FCFP_6	SciTegic.value.IntegerFingerprintValue	G876	-551388563	4	16696426	4	4	1.57636942479352
MMV_Model4	FCFP_6	SciTegic.value.IntegerFingerprintValue	G877	-1585220441	4	16696426	4	4	1.57636942479352
MMV_Model4	FCFP_6	SciTegic.value.IntegerFingerprintValue	G878	-811517727	4	16696426	4	4	1.57636942479352
MMV_Model4	FCFP_6	SciTegic.value.IntegerFingerprintValue	G879	378139141	4	16696426	4	4	1.57636942479352
MMV_Model4	FCFP_6	SciTegic.value.IntegerFingerprintValue	G880	-1743394556	4	16696426	4	4	1.57636942479352
MMV_Model4	FCFP_6	SciTegic.value.IntegerFingerprintValue	G881	-2002561723	4	16696426	4	4	1.57636942479352
MMV_Model4	FCFP_6	SciTegic.value.IntegerFingerprintValue	G882	752234173	4	16696426	4	4	1.57636942479352
MMV_Model4	FCFP_6	SciTegic.value.IntegerFingerprintValue	G883	-968586170	4	16696426	4	4	1.57636942479352
MMV_Model4	FCFP_6	SciTegic.value.IntegerFingerprintValue	G884	576336675	4	16696426	4	4	1.57636942479352
MMV_Model4	FCFP_6	SciTegic.value.IntegerFingerprintValue	G885	1415612355	4	16696426	4	4	1.57636942479352
MMV_Model4	FCFP_6	SciTegic.value.IntegerFingerprintValue	G886	-1773238308	4	16696426	4	4	1.57636942479352
MMV_Model4	FCFP_6	SciTegic.value.IntegerFingerprintValue	G887	-1330966359	4	16696426	4	4	1.57636942479352
MMV_Model4	FCFP_6	SciTegic.value.IntegerFingerprintValue	G888	1911908145	4	16696426	4	4	1.57636942479352
MMV_Model4	FCFP_6	SciTegic.value.IntegerFingerprintValue	G889	388030762	867	16696426	39	39	1.57414043202545
MMV_Model4	FCFP_6	SciTegic.value.IntegerFingerprintValue	G890	-28541910	29	16696426	5	5	1.57362474396698
MMV_Model4	FCFP_6	SciTegic.value.IntegerFingerprintValue	G891	-1307158394	770	16696426	35	35	1.57234212261825
MMV_Model4	FCFP_6	SciTegic.value.IntegerFingerprintValue	G892	472132733	277	16696426	15	15	1.57013399904763
MMV_Model4	FCFP_6	SciTegic.value.IntegerFingerprintValue	G893	-1679623301	5	16696426	4	4	1.56827038509337
MMV_Model4	FCFP_6	SciTegic.value.IntegerFingerprintValue	G894	-263467450	5	16696426	4	4	1.56827038509337
MMV_Model4	FCFP_6	SciTegic.value.IntegerFingerprintValue	G895	-421674002	5	16696426	4	4	1.56827038509337
MMV_Model4	FCFP_6	SciTegic.value.IntegerFingerprintValue	G896	-835178751	5	16696426	4	4	1.56827038509337
MMV_Model4	FCFP_6	SciTegic.value.IntegerFingerprintValue	G897	773751811	5	16696426	4	4	1.56827038509337
MMV_Model4	FCFP_6	SciTegic.value.IntegerFingerprintValue	G898	1697692281	5	16696426	4	4	1.56827038509337
MMV_Model4	FCFP_6	SciTegic.value.IntegerFingerprintValue	G899	1753306239	5	16696426	4	4	1.56827038509337
MMV_Model4	FCFP_6	SciTegic.value.IntegerFingerprintValue	G900	-794458743	5	16696426	4	4	1.56827038509337
MMV_Model4	FCFP_6	SciTegic.value.IntegerFingerprintValue	G901	2033892561	5	16696426	4	4	1.56827038509337
MMV_Model4	FCFP_6	SciTegic.value.IntegerFingerprintValue	G902	32083832	5	16696426	4	4	1.56827038509337
MMV_Model4	FCFP_6	SciTegic.value.IntegerFingerprintValue	G903	-117595590	129	16696426	9	9	1.56815787927237
MMV_Model4	FCFP_6	SciTegic.value.IntegerFingerprintValue	G904	92557375	923	16696426	41	41	1.56768820790608
MMV_Model4	FCFP_6	SciTegic.value.IntegerFingerprintValue	G905	1232672760	30	16696426	5	5	1.5668894465046
MMV_Model4	FCFP_6	SciTegic.value.IntegerFingerprintValue	G906	50560151	30	16696426	5	5	1.5668894465046
MMV_Model4	FCFP_6	SciTegic.value.IntegerFingerprintValue	G907	-509601776	30	16696426	5	5	1.5668894465046
MMV_Model4	FCFP_6	SciTegic.value.IntegerFingerprintValue	G908	-794334583	328	16696426	17	17	1.56676461331338
MMV_Model4	FCFP_6	SciTegic.value.IntegerFingerprintValue	G909	-1719745634	204	16696426	12	12	1.56627244485019
MMV_Model4	FCFP_6	SciTegic.value.IntegerFingerprintValue	G910	1874415599	55	16696426	6	6	1.56590422804042
MMV_Model4	FCFP_6	SciTegic.value.IntegerFingerprintValue	G911	1855717658	405	16696426	20	20	1.56197303214336
MMV_Model4	FCFP_6	SciTegic.value.IntegerFingerprintValue	G912	359488889	6	16696426	4	4	1.56023641320333
MMV_Model4	FCFP_6	SciTegic.value.IntegerFingerprintValue	G913	-1792393467	6	16696426	4	4	1.56023641320333
MMV_Model4	FCFP_6	SciTegic.value.IntegerFingerprintValue	G914	1123544756	6	16696426	4	4	1.56023641320333
MMV_Model4	FCFP_6	SciTegic.value.IntegerFingerprintValue	G915	-1034880472	6	16696426	4	4	1.56023641320333
MMV_Model4	FCFP_6	SciTegic.value.IntegerFingerprintValue	G916	-2098936975	6	16696426	4	4	1.56023641320333
MMV_Model4	FCFP_6	SciTegic.value.IntegerFingerprintValue	G917	-1406618265	6	16696426	4	4	1.56023641320333
MMV_Model4	FCFP_6	SciTegic.value.IntegerFingerprintValue	G918	-1350666538	31	16696426	5	5	1.56019920994475
MMV_Model4	FCFP_6	SciTegic.value.IntegerFingerprintValue	G919	-1104868196	31	16696426	5	5	1.56019920994475
MMV_Model4	FCFP_6	SciTegic.value.IntegerFingerprintValue	G920	191479386	31	16696426	5	5	1.56019920994475
MMV_Model4	FCFP_6	SciTegic.value.IntegerFingerprintValue	G921	1844448897	31	16696426	5	5	1.56019920994475
MMV_Model4	FCFP_6	SciTegic.value.IntegerFingerprintValue	G922	-708547153	31	16696426	5	5	1.56019920994475
MMV_Model4	FCFP_6	SciTegic.value.IntegerFingerprintValue	G923	-494280915	31	16696426	5	5	1.56019920994475
MMV_Model4	FCFP_6	SciTegic.value.IntegerFingerprintValue	G924	-8322670	106	16696426	8	8	1.56013720758935
MMV_Model4	FCFP_6	SciTegic.value.IntegerFingerprintValue	G925	1810803480	106	16696426	8	8	1.56013720758935
MMV_Model4	FCFP_6	SciTegic.value.IntegerFingerprintValue	G926	1540977451	131	16696426	9	9	1.56012480757957
MMV_Model4	FCFP_6	SciTegic.value.IntegerFingerprintValue	G927	481369446	132	16696426	9	9	1.55613234169103
MMV_Model4	FCFP_6	SciTegic.value.IntegerFingerprintValue	G928	-344419607	334	16696426	17	17	1.55343025578598
MMV_Model4	FCFP_6	SciTegic.value.IntegerFingerprintValue	G929	-977844488	7	16696426	4	4	1.55226647193902
MMV_Model4	FCFP_6	SciTegic.value.IntegerFingerprintValue	G930	-103317027	7	16696426	4	4	1.55226647193902
MMV_Model4	FCFP_6	SciTegic.value.IntegerFingerprintValue	G931	-2058403945	7	16696426	4	4	1.55226647193902
MMV_Model4	FCFP_6	SciTegic.value.IntegerFingerprintValue	G932	-1593405509	7	16696426	4	4	1.55226647193902
MMV_Model4	FCFP_6	SciTegic.value.IntegerFingerprintValue	G933	1237111901	7	16696426	4	4	1.55226647193902
MMV_Model4	FCFP_6	SciTegic.value.IntegerFingerprintValue	G934	-1279010065	7	16696426	4	4	1.55226647193902
MMV_Model4	FCFP_6	SciTegic.value.IntegerFingerprintValue	G935	-1056637141	159	16696426	10	10	1.54926355139173
MMV_Model4	FCFP_6	SciTegic.value.IntegerFingerprintValue	G936	1248944046	58	16696426	6	6	1.5488070768581
MMV_Model4	FCFP_6	SciTegic.value.IntegerFingerprintValue	G937	-1063887055	58	16696426	6	6	1.5488070768581
MMV_Model4	FCFP_6	SciTegic.value.IntegerFingerprintValue	G938	844889696	539	16696426	25	25	1.54782304312831
MMV_Model4	FCFP_6	SciTegic.value.IntegerFingerprintValue	G939	2076566736	33	16696426	5	5	1.54695153566045
MMV_Model4	FCFP_6	SciTegic.value.IntegerFingerprintValue	G940	-1373956533	33	16696426	5	5	1.54695153566045
MMV_Model4	FCFP_6	SciTegic.value.IntegerFingerprintValue	G941	740591585	261	16696426	14	14	1.54684140281758
MMV_Model4	FCFP_6	SciTegic.value.IntegerFingerprintValue	G942	-142904393	8	16696426	4	4	1.5443595487193
MMV_Model4	FCFP_6	SciTegic.value.IntegerFingerprintValue	G943	539235743	8	16696426	4	4	1.5443595487193
MMV_Model4	FCFP_6	SciTegic.value.IntegerFingerprintValue	G944	2009385491	8	16696426	4	4	1.5443595487193
MMV_Model4	FCFP_6	SciTegic.value.IntegerFingerprintValue	G945	111834437	8	16696426	4	4	1.5443595487193
MMV_Model4	FCFP_6	SciTegic.value.IntegerFingerprintValue	G946	352514024	8	16696426	4	4	1.5443595487193
MMV_Model4	FCFP_6	SciTegic.value.IntegerFingerprintValue	G947	-1014108869	8	16696426	4	4	1.5443595487193
MMV_Model4	FCFP_6	SciTegic.value.IntegerFingerprintValue	G948	-908297949	8	16696426	4	4	1.5443595487193
MMV_Model4	FCFP_6	SciTegic.value.IntegerFingerprintValue	G949	-87165443	8	16696426	4	4	1.5443595487193
MMV_Model4	FCFP_6	SciTegic.value.IntegerFingerprintValue	G950	-984399200	8	16696426	4	4	1.5443595487193
MMV_Model4	FCFP_6	SciTegic.value.IntegerFingerprintValue	G951	176011517	8	16696426	4	4	1.5443595487193
MMV_Model4	FCFP_6	SciTegic.value.IntegerFingerprintValue	G952	-353887460	570	16696426	26	26	1.53952512381995
MMV_Model4	FCFP_6	SciTegic.value.IntegerFingerprintValue	G953	-865684187	162	16696426	10	10	1.53852892431104
MMV_Model4	FCFP_6	SciTegic.value.IntegerFingerprintValue	G954	1711177049	60	16696426	6	6	1.53756924232433
MMV_Model4	FCFP_6	SciTegic.value.IntegerFingerprintValue	G955	874918016	60	16696426	6	6	1.53756924232433
MMV_Model4	FCFP_6	SciTegic.value.IntegerFingerprintValue	G956	-1530626782	188	16696426	11	11	1.5370388144542
MMV_Model4	FCFP_6	SciTegic.value.IntegerFingerprintValue	G957	1145580640	9	16696426	4	4	1.53651465479414
MMV_Model4	FCFP_6	SciTegic.value.IntegerFingerprintValue	G958	-1656626703	9	16696426	4	4	1.53651465479414
MMV_Model4	FCFP_6	SciTegic.value.IntegerFingerprintValue	G959	-690669862	9	16696426	4	4	1.53651465479414
MMV_Model4	FCFP_6	SciTegic.value.IntegerFingerprintValue	G960	1451379955	9	16696426	4	4	1.53651465479414
MMV_Model4	FCFP_6	SciTegic.value.IntegerFingerprintValue	G961	-581505804	9	16696426	4	4	1.53651465479414
MMV_Model4	FCFP_6	SciTegic.value.IntegerFingerprintValue	G962	1324782139	9	16696426	4	4	1.53651465479414
MMV_Model4	FCFP_6	SciTegic.value.IntegerFingerprintValue	G963	-701893397	9	16696426	4	4	1.53651465479414
MMV_Model4	FCFP_6	SciTegic.value.IntegerFingerprintValue	G964	1001162743	9	16696426	4	4	1.53651465479414
MMV_Model4	FCFP_6	SciTegic.value.IntegerFingerprintValue	G965	-1280173816	9	16696426	4	4	1.53651465479414
MMV_Model4	FCFP_6	SciTegic.value.IntegerFingerprintValue	G966	1899007694	9	16696426	4	4	1.53651465479414
MMV_Model4	FCFP_6	SciTegic.value.IntegerFingerprintValue	G967	-1538573536	9	16696426	4	4	1.53651465479414
MMV_Model4	FCFP_6	SciTegic.value.IntegerFingerprintValue	G968	-17013416	9	16696426	4	4	1.53651465479414
MMV_Model4	FCFP_6	SciTegic.value.IntegerFingerprintValue	G969	1886282851	9	16696426	4	4	1.53651465479414
MMV_Model4	FCFP_6	SciTegic.value.IntegerFingerprintValue	G970	1999918182	9	16696426	4	4	1.53651465479414
MMV_Model4	FCFP_6	SciTegic.value.IntegerFingerprintValue	G971	64157430	9	16696426	4	4	1.53651465479414
MMV_Model4	FCFP_6	SciTegic.value.IntegerFingerprintValue	G972	882019871	9	16696426	4	4	1.53651465479414
MMV_Model4	FCFP_6	SciTegic.value.IntegerFingerprintValue	G973	-1406736492	9	16696426	4	4	1.53651465479414
MMV_Model4	FCFP_6	SciTegic.value.IntegerFingerprintValue	G974	1011550410	9	16696426	4	4	1.53651465479414
MMV_Model4	FCFP_6	SciTegic.value.IntegerFingerprintValue	G975	-998750218	9	16696426	4	4	1.53651465479414
MMV_Model4	FCFP_6	SciTegic.value.IntegerFingerprintValue	G976	1643096725	9	16696426	4	4	1.53651465479414
MMV_Model4	FCFP_6	SciTegic.value.IntegerFingerprintValue	G977	500458446	9	16696426	4	4	1.53651465479414
MMV_Model4	FCFP_6	SciTegic.value.IntegerFingerprintValue	G978	1224438470	9	16696426	4	4	1.53651465479414
MMV_Model4	FCFP_6	SciTegic.value.IntegerFingerprintValue	G979	-1749446655	9	16696426	4	4	1.53651465479414
MMV_Model4	FCFP_6	SciTegic.value.IntegerFingerprintValue	G980	-790544894	9	16696426	4	4	1.53651465479414
MMV_Model4	FCFP_6	SciTegic.value.IntegerFingerprintValue	G981	1344187422	9	16696426	4	4	1.53651465479414
MMV_Model4	FCFP_6	SciTegic.value.IntegerFingerprintValue	G982	-474702506	9	16696426	4	4	1.53651465479414
MMV_Model4	FCFP_6	SciTegic.value.IntegerFingerprintValue	G983	-1691368556	9	16696426	4	4	1.53651465479414
MMV_Model4	FCFP_6	SciTegic.value.IntegerFingerprintValue	G984	940256182	9	16696426	4	4	1.53651465479414
MMV_Model4	FCFP_6	SciTegic.value.IntegerFingerprintValue	G985	-1860702741	86	16696426	7	7	1.53545669271768
MMV_Model4	FCFP_6	SciTegic.value.IntegerFingerprintValue	G986	-438306868	86	16696426	7	7	1.53545669271768
MMV_Model4	FCFP_6	SciTegic.value.IntegerFingerprintValue	G987	-1604301295	2882	16696426	116	116	1.53437142449235
MMV_Model4	FCFP_6	SciTegic.value.IntegerFingerprintValue	G988	-1200353060	35	16696426	5	5	1.5338770701369
MMV_Model4	FCFP_6	SciTegic.value.IntegerFingerprintValue	G989	-1679130772	112	16696426	8	8	1.53381667847543
MMV_Model4	FCFP_6	SciTegic.value.IntegerFingerprintValue	G990	677475771	189	16696426	11	11	1.53378648401233
MMV_Model4	FCFP_6	SciTegic.value.IntegerFingerprintValue	G991	2073455921	189	16696426	11	11	1.53378648401233
MMV_Model4	FCFP_6	SciTegic.value.IntegerFingerprintValue	G992	-1203091647	420	16696426	20	20	1.53374766389937
MMV_Model4	FCFP_6	SciTegic.value.IntegerFingerprintValue	G993	-1140333173	446	16696426	21	21	1.53315513746285
MMV_Model4	FCFP_6	SciTegic.value.IntegerFingerprintValue	G994	775157529	10	16696426	4	4	1.52873082450268
MMV_Model4	FCFP_6	SciTegic.value.IntegerFingerprintValue	G995	1212584253	10	16696426	4	4	1.52873082450268
MMV_Model4	FCFP_6	SciTegic.value.IntegerFingerprintValue	G996	1641257078	10	16696426	4	4	1.52873082450268
MMV_Model4	FCFP_6	SciTegic.value.IntegerFingerprintValue	G997	1516962674	10	16696426	4	4	1.52873082450268
MMV_Model4	FCFP_6	SciTegic.value.IntegerFingerprintValue	G998	1234796686	10	16696426	4	4	1.52873082450268
MMV_Model4	FCFP_6	SciTegic.value.IntegerFingerprintValue	G999	2030558002	36	16696426	5	5	1.5274033867258
MMV_Model4	FCFP_6	SciTegic.value.IntegerFingerprintValue	G1000	1201001820	36	16696426	5	5	1.5274033867258
MMV_Model4	FCFP_6	SciTegic.value.IntegerFingerprintValue	G1001	371216465	36	16696426	5	5	1.5274033867258
MMV_Model4	FCFP_6	SciTegic.value.IntegerFingerprintValue	G1002	144177173	62	16696426	6	6	1.52645629455844
MMV_Model4	FCFP_6	SciTegic.value.IntegerFingerprintValue	G1003	1865861167	88	16696426	7	7	1.5257465636142
MMV_Model4	FCFP_6	SciTegic.value.IntegerFingerprintValue	G1004	551977454	3335	16696426	132	132	1.52195798547233
MMV_Model4	FCFP_6	SciTegic.value.IntegerFingerprintValue	G1005	2080636024	11	16696426	4	4	1.52100711455983
MMV_Model4	FCFP_6	SciTegic.value.IntegerFingerprintValue	G1006	-2102878523	63	16696426	6	6	1.52094579177327
MMV_Model4	FCFP_6	SciTegic.value.IntegerFingerprintValue	G1007	1990573562	63	16696426	6	6	1.52094579177327
MMV_Model4	FCFP_6	SciTegic.value.IntegerFingerprintValue	G1008	2026512205	63	16696426	6	6	1.52094579177327
MMV_Model4	FCFP_6	SciTegic.value.IntegerFingerprintValue	G1009	1877407410	141	16696426	9	9	1.52089980215104
MMV_Model4	FCFP_6	SciTegic.value.IntegerFingerprintValue	G1010	118130156	167	16696426	10	10	1.52089004704853
MMV_Model4	FCFP_6	SciTegic.value.IntegerFingerprintValue	G1011	-537729979	431	16696426	20	20	1.51354392139947
MMV_Model4	FCFP_6	SciTegic.value.IntegerFingerprintValue	G1012	-878418299	12	16696426	4	4	1.51334260337031
MMV_Model4	FCFP_6	SciTegic.value.IntegerFingerprintValue	G1013	612339775	12	16696426	4	4	1.51334260337031
MMV_Model4	FCFP_6	SciTegic.value.IntegerFingerprintValue	G1014	350771566	12	16696426	4	4	1.51334260337031
MMV_Model4	FCFP_6	SciTegic.value.IntegerFingerprintValue	G1015	1538374	248	16696426	13	13	1.51266053663224
MMV_Model4	FCFP_6	SciTegic.value.IntegerFingerprintValue	G1016	195960291	380	16696426	18	18	1.51077782953821
MMV_Model4	FCFP_6	SciTegic.value.IntegerFingerprintValue	G1017	-303606544	65	16696426	6	6	1.51001505491349
MMV_Model4	FCFP_6	SciTegic.value.IntegerFingerprintValue	G1018	-170659279	39	16696426	5	5	1.50823005268711
MMV_Model4	FCFP_6	SciTegic.value.IntegerFingerprintValue	G1019	1965626460	197	16696426	11	11	1.50814176018588
MMV_Model4	FCFP_6	SciTegic.value.IntegerFingerprintValue	G1020	-574011347	355	16696426	17	17	1.5081123310844
MMV_Model4	FCFP_6	SciTegic.value.IntegerFingerprintValue	G1021	-2080928897	434	16696426	20	20	1.50810392292876
MMV_Model4	FCFP_6	SciTegic.value.IntegerFingerprintValue	G1022	968749893	13	16696426	4	4	1.50573639036867
MMV_Model4	FCFP_6	SciTegic.value.IntegerFingerprintValue	G1023	-740478727	13	16696426	4	4	1.50573639036867
MMV_Model4	FCFP_6	SciTegic.value.IntegerFingerprintValue	G1024	-1471059436	13	16696426	4	4	1.50573639036867
MMV_Model4	FCFP_6	SciTegic.value.IntegerFingerprintValue	G1025	-615141289	13	16696426	4	4	1.50573639036867
MMV_Model4	FCFP_6	SciTegic.value.IntegerFingerprintValue	G1026	1133457313	13	16696426	4	4	1.50573639036867
MMV_Model4	FCFP_6	SciTegic.value.IntegerFingerprintValue	G1027	-1781562470	13	16696426	4	4	1.50573639036867
MMV_Model4	FCFP_6	SciTegic.value.IntegerFingerprintValue	G1028	1234202002	13	16696426	4	4	1.50573639036867
MMV_Model4	FCFP_6	SciTegic.value.IntegerFingerprintValue	G1029	-754690372	13	16696426	4	4	1.50573639036867
MMV_Model4	FCFP_6	SciTegic.value.IntegerFingerprintValue	G1030	347586483	279	16696426	14	14	1.5005573298537
MMV_Model4	FCFP_6	SciTegic.value.IntegerFingerprintValue	G1031	-1116808886	67	16696426	6	6	1.49920250831938
MMV_Model4	FCFP_6	SciTegic.value.IntegerFingerprintValue	G1032	1800760657	67	16696426	6	6	1.49920250831938
MMV_Model4	FCFP_6	SciTegic.value.IntegerFingerprintValue	G1033	55278901	14	16696426	4	4	1.49818759538432
MMV_Model4	FCFP_6	SciTegic.value.IntegerFingerprintValue	G1034	581655776	14	16696426	4	4	1.49818759538432
MMV_Model4	FCFP_6	SciTegic.value.IntegerFingerprintValue	G1035	73654451	14	16696426	4	4	1.49818759538432
MMV_Model4	FCFP_6	SciTegic.value.IntegerFingerprintValue	G1036	-1923404683	14	16696426	4	4	1.49818759538432
MMV_Model4	FCFP_6	SciTegic.value.IntegerFingerprintValue	G1037	1265025577	14	16696426	4	4	1.49818759538432
MMV_Model4	FCFP_6	SciTegic.value.IntegerFingerprintValue	G1038	439859444	14	16696426	4	4	1.49818759538432
MMV_Model4	FCFP_6	SciTegic.value.IntegerFingerprintValue	G1039	892848561	14	16696426	4	4	1.49818759538432
MMV_Model4	FCFP_6	SciTegic.value.IntegerFingerprintValue	G1040	2140610226	94	16696426	7	7	1.49716939441668
MMV_Model4	FCFP_6	SciTegic.value.IntegerFingerprintValue	G1041	649703528	760	16696426	32	32	1.49664344046412
MMV_Model4	FCFP_6	SciTegic.value.IntegerFingerprintValue	G1042	1442826005	254	16696426	13	13	1.49644274222311
MMV_Model4	FCFP_6	SciTegic.value.IntegerFingerprintValue	G1043	-166054937	308	16696426	15	15	1.49475908235769
MMV_Model4	FCFP_6	SciTegic.value.IntegerFingerprintValue	G1044	-2041127570	255	16696426	13	13	1.49376516446373
MMV_Model4	FCFP_6	SciTegic.value.IntegerFingerprintValue	G1045	-728777755	15	16696426	4	4	1.49069535803029
MMV_Model4	FCFP_6	SciTegic.value.IntegerFingerprintValue	G1046	352714541	15	16696426	4	4	1.49069535803029
MMV_Model4	FCFP_6	SciTegic.value.IntegerFingerprintValue	G1047	1139072989	15	16696426	4	4	1.49069535803029
MMV_Model4	FCFP_6	SciTegic.value.IntegerFingerprintValue	G1048	161682573	15	16696426	4	4	1.49069535803029
MMV_Model4	FCFP_6	SciTegic.value.IntegerFingerprintValue	G1049	-1562424871	15	16696426	4	4	1.49069535803029
MMV_Model4	FCFP_6	SciTegic.value.IntegerFingerprintValue	G1050	-456727514	15	16696426	4	4	1.49069535803029
MMV_Model4	FCFP_6	SciTegic.value.IntegerFingerprintValue	G1051	-1972911212	15	16696426	4	4	1.49069535803029
MMV_Model4	FCFP_6	SciTegic.value.IntegerFingerprintValue	G1052	929924887	15	16696426	4	4	1.49069535803029
MMV_Model4	FCFP_6	SciTegic.value.IntegerFingerprintValue	G1053	-82378431	15	16696426	4	4	1.49069535803029
MMV_Model4	FCFP_6	SciTegic.value.IntegerFingerprintValue	G1054	406848969	15	16696426	4	4	1.49069535803029
MMV_Model4	FCFP_6	SciTegic.value.IntegerFingerprintValue	G1055	-110165115	15	16696426	4	4	1.49069535803029
MMV_Model4	FCFP_6	SciTegic.value.IntegerFingerprintValue	G1056	1134314095	149	16696426	9	9	1.49059124947723
MMV_Model4	FCFP_6	SciTegic.value.IntegerFingerprintValue	G1057	-1383493701	69	16696426	6	6	1.48850562340658
MMV_Model4	FCFP_6	SciTegic.value.IntegerFingerprintValue	G1058	1263787018	257	16696426	13	13	1.48843142170245
MMV_Model4	FCFP_6	SciTegic.value.IntegerFingerprintValue	G1059	1822510752	96	16696426	7	7	1.48782231350852
MMV_Model4	FCFP_6	SciTegic.value.IntegerFingerprintValue	G1060	-174657146	1225	16696426	49	49	1.48752728033873
MMV_Model4	FCFP_6	SciTegic.value.IntegerFingerprintValue	G1061	79039886	123	16696426	8	8	1.48729117287035
MMV_Model4	FCFP_6	SciTegic.value.IntegerFingerprintValue	G1062	951742167	16	16696426	4	4	1.48325883711473
MMV_Model4	FCFP_6	SciTegic.value.IntegerFingerprintValue	G1063	-793326023	16	16696426	4	4	1.48325883711473
MMV_Model4	FCFP_6	SciTegic.value.IntegerFingerprintValue	G1064	660399315	97	16696426	7	7	1.48318133316934
MMV_Model4	FCFP_6	SciTegic.value.IntegerFingerprintValue	G1065	490780688	991	16696426	40	40	1.48037094418657
MMV_Model4	FCFP_6	SciTegic.value.IntegerFingerprintValue	G1066	2078743054	71	16696426	6	6	1.47792195187816
MMV_Model4	FCFP_6	SciTegic.value.IntegerFingerprintValue	G1067	558647284	71	16696426	6	6	1.47792195187816
MMV_Model4	FCFP_6	SciTegic.value.IntegerFingerprintValue	G1068	-1999778821	17	16696426	4	4	1.47587721007417
MMV_Model4	FCFP_6	SciTegic.value.IntegerFingerprintValue	G1069	-1388993711	17	16696426	4	4	1.47587721007417
MMV_Model4	FCFP_6	SciTegic.value.IntegerFingerprintValue	G1070	-2094023505	17	16696426	4	4	1.47587721007417
MMV_Model4	FCFP_6	SciTegic.value.IntegerFingerprintValue	G1071	-822054514	17	16696426	4	4	1.47587721007417
MMV_Model4	FCFP_6	SciTegic.value.IntegerFingerprintValue	G1072	462980835	289	16696426	14	14	1.47574044266648
MMV_Model4	FCFP_6	SciTegic.value.IntegerFingerprintValue	G1073	147463122	262	16696426	13	13	1.4752202162266
MMV_Model4	FCFP_6	SciTegic.value.IntegerFingerprintValue	G1074	-1707628704	208	16696426	11	11	1.47392083292693
MMV_Model4	FCFP_6	SciTegic.value.IntegerFingerprintValue	G1075	-1075133517	72	16696426	6	6	1.47267182716255
MMV_Model4	FCFP_6	SciTegic.value.IntegerFingerprintValue	G1076	-1354752974	72	16696426	6	6	1.47267182716255
MMV_Model4	FCFP_6	SciTegic.value.IntegerFingerprintValue	G1077	387813933	72	16696426	6	6	1.47267182716255
MMV_Model4	FCFP_6	SciTegic.value.IntegerFingerprintValue	G1078	-2139550529	72	16696426	6	6	1.47267182716255
MMV_Model4	FCFP_6	SciTegic.value.IntegerFingerprintValue	G1079	857767945	127	16696426	8	8	1.4708954884776
MMV_Model4	FCFP_6	SciTegic.value.IntegerFingerprintValue	G1080	-2062512	127	16696426	8	8	1.4708954884776
MMV_Model4	FCFP_6	SciTegic.value.IntegerFingerprintValue	G1081	-1184968165	18	16696426	4	4	1.46854967242744
MMV_Model4	FCFP_6	SciTegic.value.IntegerFingerprintValue	G1082	-2050453629	18	16696426	4	4	1.46854967242744
MMV_Model4	FCFP_6	SciTegic.value.IntegerFingerprintValue	G1083	2101379451	18	16696426	4	4	1.46854967242744
MMV_Model4	FCFP_6	SciTegic.value.IntegerFingerprintValue	G1084	-1662262954	210	16696426	11	11	1.46782273440607
MMV_Model4	FCFP_6	SciTegic.value.IntegerFingerprintValue	G1085	-1553321194	539	16696426	23	23	1.46778033545477
MMV_Model4	FCFP_6	SciTegic.value.IntegerFingerprintValue	G1086	1103964716	73	16696426	6	6	1.46744912236114
MMV_Model4	FCFP_6	SciTegic.value.IntegerFingerprintValue	G1087	482747395	485	16696426	21	21	1.46640348241719
MMV_Model4	FCFP_6	SciTegic.value.IntegerFingerprintValue	G1088	-821337577	46	16696426	5	5	1.46487212002588
MMV_Model4	FCFP_6	SciTegic.value.IntegerFingerprintValue	G1089	544217700	156	16696426	9	9	1.46480448242707
MMV_Model4	FCFP_6	SciTegic.value.IntegerFingerprintValue	G1090	-1573180442	679	16696426	28	28	1.46411123074165
MMV_Model4	FCFP_6	SciTegic.value.IntegerFingerprintValue	G1091	-542586478	735	16696426	30	30	1.4629777164755
MMV_Model4	FCFP_6	SciTegic.value.IntegerFingerprintValue	G1092	1714962845	19	16696426	4	4	1.4612754372496
MMV_Model4	FCFP_6	SciTegic.value.IntegerFingerprintValue	G1093	1028972858	19	16696426	4	4	1.4612754372496
MMV_Model4	FCFP_6	SciTegic.value.IntegerFingerprintValue	G1094	1469231205	19	16696426	4	4	1.4612754372496
MMV_Model4	FCFP_6	SciTegic.value.IntegerFingerprintValue	G1095	-1215353686	19	16696426	4	4	1.4612754372496
MMV_Model4	FCFP_6	SciTegic.value.IntegerFingerprintValue	G1096	2077275115	47	16696426	5	5	1.45882878689745
MMV_Model4	FCFP_6	SciTegic.value.IntegerFingerprintValue	G1097	-731434720	47	16696426	5	5	1.45882878689745
MMV_Model4	FCFP_6	SciTegic.value.IntegerFingerprintValue	G1098	-1055073319	213	16696426	11	11	1.4587447499929
MMV_Model4	FCFP_6	SciTegic.value.IntegerFingerprintValue	G1099	1474313868	103	16696426	7	7	1.4557788679539
MMV_Model4	FCFP_6	SciTegic.value.IntegerFingerprintValue	G1100	1276114231	20	16696426	4	4	1.4540537346647
MMV_Model4	FCFP_6	SciTegic.value.IntegerFingerprintValue	G1101	-734692140	20	16696426	4	4	1.4540537346647
MMV_Model4	FCFP_6	SciTegic.value.IntegerFingerprintValue	G1102	-626477018	20	16696426	4	4	1.4540537346647
MMV_Model4	FCFP_6	SciTegic.value.IntegerFingerprintValue	G1103	-1392937591	20	16696426	4	4	1.4540537346647
MMV_Model4	FCFP_6	SciTegic.value.IntegerFingerprintValue	G1104	1028639794	20	16696426	4	4	1.4540537346647
MMV_Model4	FCFP_6	SciTegic.value.IntegerFingerprintValue	G1105	-1912185379	20	16696426	4	4	1.4540537346647
MMV_Model4	FCFP_6	SciTegic.value.IntegerFingerprintValue	G1106	-304037074	20	16696426	4	4	1.4540537346647
MMV_Model4	FCFP_6	SciTegic.value.IntegerFingerprintValue	G1107	1152167092	20	16696426	4	4	1.4540537346647
MMV_Model4	FCFP_6	SciTegic.value.IntegerFingerprintValue	G1108	-1017594911	20	16696426	4	4	1.4540537346647
MMV_Model4	FCFP_6	SciTegic.value.IntegerFingerprintValue	G1109	-1797185569	76	16696426	6	6	1.45194270018748
MMV_Model4	FCFP_6	SciTegic.value.IntegerFingerprintValue	G1110	1311526433	21	16696426	4	4	1.44688381135692
MMV_Model4	FCFP_6	SciTegic.value.IntegerFingerprintValue	G1111	197351672	21	16696426	4	4	1.44688381135692
MMV_Model4	FCFP_6	SciTegic.value.IntegerFingerprintValue	G1112	153642180	21	16696426	4	4	1.44688381135692
MMV_Model4	FCFP_6	SciTegic.value.IntegerFingerprintValue	G1113	680472603	105	16696426	7	7	1.4468090758578
MMV_Model4	FCFP_6	SciTegic.value.IntegerFingerprintValue	G1114	-1421053900	133	16696426	8	8	1.44679523656347
MMV_Model4	FCFP_6	SciTegic.value.IntegerFingerprintValue	G1115	182392092	189	16696426	10	10	1.4467751070227
MMV_Model4	FCFP_6	SciTegic.value.IntegerFingerprintValue	G1116	1247913345	189	16696426	10	10	1.4467751070227
MMV_Model4	FCFP_6	SciTegic.value.IntegerFingerprintValue	G1117	-1072054608	245	16696426	12	12	1.44676117142415
MMV_Model4	FCFP_6	SciTegic.value.IntegerFingerprintValue	G1118	409502433	639	16696426	26	26	1.44407932339913
MMV_Model4	FCFP_6	SciTegic.value.IntegerFingerprintValue	G1119	-446903474	134	16696426	8	8	1.44283439774435
MMV_Model4	FCFP_6	SciTegic.value.IntegerFingerprintValue	G1120	-1853238794	359	16696426	16	16	1.44255001391818
MMV_Model4	FCFP_6	SciTegic.value.IntegerFingerprintValue	G1121	371600994	78	16696426	6	6	1.44173707741884
MMV_Model4	FCFP_6	SciTegic.value.IntegerFingerprintValue	G1122	-102681622	22	16696426	4	4	1.4397649300989
MMV_Model4	FCFP_6	SciTegic.value.IntegerFingerprintValue	G1123	-830183577	22	16696426	4	4	1.4397649300989
MMV_Model4	FCFP_6	SciTegic.value.IntegerFingerprintValue	G1124	2017025162	22	16696426	4	4	1.4397649300989
MMV_Model4	FCFP_6	SciTegic.value.IntegerFingerprintValue	G1125	-1734724375	22	16696426	4	4	1.4397649300989
MMV_Model4	FCFP_6	SciTegic.value.IntegerFingerprintValue	G1126	-540945071	22	16696426	4	4	1.4397649300989
MMV_Model4	FCFP_6	SciTegic.value.IntegerFingerprintValue	G1127	1748222073	22	16696426	4	4	1.4397649300989
MMV_Model4	FCFP_6	SciTegic.value.IntegerFingerprintValue	G1128	1516560666	22	16696426	4	4	1.4397649300989
MMV_Model4	FCFP_6	SciTegic.value.IntegerFingerprintValue	G1129	-804645342	22	16696426	4	4	1.4397649300989
MMV_Model4	FCFP_6	SciTegic.value.IntegerFingerprintValue	G1130	-1747175070	22	16696426	4	4	1.4397649300989
MMV_Model4	FCFP_6	SciTegic.value.IntegerFingerprintValue	G1131	-1334642732	22	16696426	4	4	1.4397649300989
MMV_Model4	FCFP_6	SciTegic.value.IntegerFingerprintValue	G1132	-2000904003	276	16696426	13	13	1.43913123113411
MMV_Model4	FCFP_6	SciTegic.value.IntegerFingerprintValue	G1133	-1879809256	51	16696426	5	5	1.43501418336751
MMV_Model4	FCFP_6	SciTegic.value.IntegerFingerprintValue	G1134	1969783445	306	16696426	14	14	1.43491571298886
MMV_Model4	FCFP_6	SciTegic.value.IntegerFingerprintValue	G1135	2006762382	23	16696426	4	4	1.43269636929691
MMV_Model4	FCFP_6	SciTegic.value.IntegerFingerprintValue	G1136	1614706045	23	16696426	4	4	1.43269636929691
MMV_Model4	FCFP_6	SciTegic.value.IntegerFingerprintValue	G1137	1366547169	23	16696426	4	4	1.43269636929691
MMV_Model4	FCFP_6	SciTegic.value.IntegerFingerprintValue	G1138	1510907703	23	16696426	4	4	1.43269636929691
MMV_Model4	FCFP_6	SciTegic.value.IntegerFingerprintValue	G1139	-1238853073	23	16696426	4	4	1.43269636929691
MMV_Model4	FCFP_6	SciTegic.value.IntegerFingerprintValue	G1140	-1264213262	23	16696426	4	4	1.43269636929691
MMV_Model4	FCFP_6	SciTegic.value.IntegerFingerprintValue	G1141	-1878945982	23	16696426	4	4	1.43269636929691
MMV_Model4	FCFP_6	SciTegic.value.IntegerFingerprintValue	G1142	-1848978031	23	16696426	4	4	1.43269636929691
MMV_Model4	FCFP_6	SciTegic.value.IntegerFingerprintValue	G1143	-923305202	23	16696426	4	4	1.43269636929691
MMV_Model4	FCFP_6	SciTegic.value.IntegerFingerprintValue	G1144	1556104795	3125	16696426	113	113	1.43053367196159
MMV_Model4	FCFP_6	SciTegic.value.IntegerFingerprintValue	G1145	943205417	3240	16696426	117	117	1.43018337923798
MMV_Model4	FCFP_6	SciTegic.value.IntegerFingerprintValue	G1146	192727486	52	16696426	5	5	1.42914810411804
MMV_Model4	FCFP_6	SciTegic.value.IntegerFingerprintValue	G1147	43564805	52	16696426	5	5	1.42914810411804
MMV_Model4	FCFP_6	SciTegic.value.IntegerFingerprintValue	G1148	546887006	24	16696426	4	4	1.42567742255188
MMV_Model4	FCFP_6	SciTegic.value.IntegerFingerprintValue	G1149	1586670002	368	16696426	16	16	1.42389554471776
MMV_Model4	FCFP_6	SciTegic.value.IntegerFingerprintValue	G1150	-1961748424	398	16696426	17	17	1.42127188299195
MMV_Model4	FCFP_6	SciTegic.value.IntegerFingerprintValue	G1151	68260455	399	16696426	17	17	1.41933941106758
MMV_Model4	FCFP_6	SciTegic.value.IntegerFingerprintValue	G1152	205262758	399	16696426	17	17	1.41933941106758
MMV_Model4	FCFP_6	SciTegic.value.IntegerFingerprintValue	G1153	-1462431663	25	16696426	4	4	1.41870739823578
MMV_Model4	FCFP_6	SciTegic.value.IntegerFingerprintValue	G1154	-853593961	25	16696426	4	4	1.41870739823578
MMV_Model4	FCFP_6	SciTegic.value.IntegerFingerprintValue	G1155	-1351416634	313	16696426	14	14	1.41857822999887
MMV_Model4	FCFP_6	SciTegic.value.IntegerFingerprintValue	G1156	432669902	54	16696426	5	5	1.41751817981922
MMV_Model4	FCFP_6	SciTegic.value.IntegerFingerprintValue	G1157	1560719586	227	16696426	11	11	1.41743754366314
MMV_Model4	FCFP_6	SciTegic.value.IntegerFingerprintValue	G1158	-1749365863	285	16696426	13	13	1.41660054464285
MMV_Model4	FCFP_6	SciTegic.value.IntegerFingerprintValue	G1159	1286194803	112	16696426	7	7	1.41603364281905
MMV_Model4	FCFP_6	SciTegic.value.IntegerFingerprintValue	G1160	1556901752	112	16696426	7	7	1.41603364281905
MMV_Model4	FCFP_6	SciTegic.value.IntegerFingerprintValue	G1161	-1320850773	26	16696426	4	4	1.41178561908266
MMV_Model4	FCFP_6	SciTegic.value.IntegerFingerprintValue	G1162	109976920	26	16696426	4	4	1.41178561908266
MMV_Model4	FCFP_6	SciTegic.value.IntegerFingerprintValue	G1163	-869565115	55	16696426	5	5	1.41175354821316
MMV_Model4	FCFP_6	SciTegic.value.IntegerFingerprintValue	G1164	-598765028	113	16696426	7	7	1.41171346107262
MMV_Model4	FCFP_6	SciTegic.value.IntegerFingerprintValue	G1165	-1264877309	1159	16696426	43	43	1.41004886692921
MMV_Model4	FCFP_6	SciTegic.value.IntegerFingerprintValue	G1166	31474178	230	16696426	11	11	1.40880370339915
MMV_Model4	FCFP_6	SciTegic.value.IntegerFingerprintValue	G1167	-709681945	405	16696426	17	17	1.40782235231611
MMV_Model4	FCFP_6	SciTegic.value.IntegerFingerprintValue	G1168	1931107002	376	16696426	16	16	1.40760097939603
MMV_Model4	FCFP_6	SciTegic.value.IntegerFingerprintValue	G1169	-1527533545	114	16696426	7	7	1.40741186304027
MMV_Model4	FCFP_6	SciTegic.value.IntegerFingerprintValue	G1170	1498549013	85	16696426	6	6	1.40681595254521
MMV_Model4	FCFP_6	SciTegic.value.IntegerFingerprintValue	G1171	872353032	785	16696426	30	30	1.40607774306854
MMV_Model4	FCFP_6	SciTegic.value.IntegerFingerprintValue	G1172	864325243	56	16696426	5	5	1.40602195720873
MMV_Model4	FCFP_6	SciTegic.value.IntegerFingerprintValue	G1173	-1648985726	27	16696426	4	4	1.40491142179369
MMV_Model4	FCFP_6	SciTegic.value.IntegerFingerprintValue	G1174	-770803388	27	16696426	4	4	1.40491142179369
MMV_Model4	FCFP_6	SciTegic.value.IntegerFingerprintValue	G1175	501247609	27	16696426	4	4	1.40491142179369
MMV_Model4	FCFP_6	SciTegic.value.IntegerFingerprintValue	G1176	-1875775894	173	16696426	9	9	1.40481587133444
MMV_Model4	FCFP_6	SciTegic.value.IntegerFingerprintValue	G1177	-798300205	173	16696426	9	9	1.40481587133444
MMV_Model4	FCFP_6	SciTegic.value.IntegerFingerprintValue	G1178	688786892	1724	16696426	62	62	1.40288894470492
MMV_Model4	FCFP_6	SciTegic.value.IntegerFingerprintValue	G1179	-893371799	86	16696426	6	6	1.40192530009315
MMV_Model4	FCFP_6	SciTegic.value.IntegerFingerprintValue	G1180	1691008075	86	16696426	6	6	1.40192530009315
MMV_Model4	FCFP_6	SciTegic.value.IntegerFingerprintValue	G1181	-255145467	291	16696426	13	13	1.40185725232916
MMV_Model4	FCFP_6	SciTegic.value.IntegerFingerprintValue	G1182	1878334571	28	16696426	4	4	1.39808415665578
MMV_Model4	FCFP_6	SciTegic.value.IntegerFingerprintValue	G1183	-1349781424	28	16696426	4	4	1.39808415665578
MMV_Model4	FCFP_6	SciTegic.value.IntegerFingerprintValue	G1184	-250014051	28	16696426	4	4	1.39808415665578
MMV_Model4	FCFP_6	SciTegic.value.IntegerFingerprintValue	G1185	1367816326	28	16696426	4	4	1.39808415665578
MMV_Model4	FCFP_6	SciTegic.value.IntegerFingerprintValue	G1186	-571423802	352	16696426	15	15	1.39667889799424
MMV_Model4	FCFP_6	SciTegic.value.IntegerFingerprintValue	G1187	-1158216930	146	16696426	8	8	1.39648906687077
MMV_Model4	FCFP_6	SciTegic.value.IntegerFingerprintValue	G1188	-347151821	735	16696426	28	28	1.39628634197682
MMV_Model4	FCFP_6	SciTegic.value.IntegerFingerprintValue	G1189	-1225769769	58	16696426	5	5	1.39465639703084
MMV_Model4	FCFP_6	SciTegic.value.IntegerFingerprintValue	G1190	-2078363644	58	16696426	5	5	1.39465639703084
MMV_Model4	FCFP_6	SciTegic.value.IntegerFingerprintValue	G1191	363180757	58	16696426	5	5	1.39465639703084
MMV_Model4	FCFP_6	SciTegic.value.IntegerFingerprintValue	G1192	194702768	176	16696426	9	9	1.39459334561021
MMV_Model4	FCFP_6	SciTegic.value.IntegerFingerprintValue	G1193	-1718551688	826	16696426	31	31	1.39346953537546
MMV_Model4	FCFP_6	SciTegic.value.IntegerFingerprintValue	G1194	-1315965708	29	16696426	4	4	1.39130318717302
MMV_Model4	FCFP_6	SciTegic.value.IntegerFingerprintValue	G1195	-544732901	29	16696426	4	4	1.39130318717302
MMV_Model4	FCFP_6	SciTegic.value.IntegerFingerprintValue	G1196	725930417	118	16696426	7	7	1.39038815449708
MMV_Model4	FCFP_6	SciTegic.value.IntegerFingerprintValue	G1197	1944805124	59	16696426	5	5	1.3890216937314
MMV_Model4	FCFP_6	SciTegic.value.IntegerFingerprintValue	G1198	513502864	59	16696426	5	5	1.3890216937314
MMV_Model4	FCFP_6	SciTegic.value.IntegerFingerprintValue	G1199	-1864631252	148	16696426	8	8	1.38896944582946
MMV_Model4	FCFP_6	SciTegic.value.IntegerFingerprintValue	G1200	224686380	712	16696426	27	27	1.38849732524082
MMV_Model4	FCFP_6	SciTegic.value.IntegerFingerprintValue	G1201	608537258	655	16696426	25	25	1.385449746654
MMV_Model4	FCFP_6	SciTegic.value.IntegerFingerprintValue	G1202	771304416	417	16696426	17	17	1.38517868360706
MMV_Model4	FCFP_6	SciTegic.value.IntegerFingerprintValue	G1203	1744259484	30	16696426	4	4	1.38456788971064
MMV_Model4	FCFP_6	SciTegic.value.IntegerFingerprintValue	G1204	-673636719	30	16696426	4	4	1.38456788971064
MMV_Model4	FCFP_6	SciTegic.value.IntegerFingerprintValue	G1205	558730229	30	16696426	4	4	1.38456788971064
MMV_Model4	FCFP_6	SciTegic.value.IntegerFingerprintValue	G1206	-1360618372	30	16696426	4	4	1.38456788971064
MMV_Model4	FCFP_6	SciTegic.value.IntegerFingerprintValue	G1207	-2097161369	269	16696426	12	12	1.38290495850506
MMV_Model4	FCFP_6	SciTegic.value.IntegerFingerprintValue	G1208	177467305	359	16696426	15	15	1.38192539210174
MMV_Model4	FCFP_6	SciTegic.value.IntegerFingerprintValue	G1209	322913085	2610	16696426	90	90	1.37806824746817
MMV_Model4	FCFP_6	SciTegic.value.IntegerFingerprintValue	G1210	-805778527	31	16696426	4	4	1.37787765315079
MMV_Model4	FCFP_6	SciTegic.value.IntegerFingerprintValue	G1211	-308346896	31	16696426	4	4	1.37787765315079
MMV_Model4	FCFP_6	SciTegic.value.IntegerFingerprintValue	G1212	886767352	31	16696426	4	4	1.37787765315079
MMV_Model4	FCFP_6	SciTegic.value.IntegerFingerprintValue	G1213	-2067388087	31	16696426	4	4	1.37787765315079
MMV_Model4	FCFP_6	SciTegic.value.IntegerFingerprintValue	G1214	1951612171	31	16696426	4	4	1.37787765315079
MMV_Model4	FCFP_6	SciTegic.value.IntegerFingerprintValue	G1215	660499232	31	16696426	4	4	1.37787765315079
MMV_Model4	FCFP_6	SciTegic.value.IntegerFingerprintValue	G1216	-2128144201	61	16696426	5	5	1.37784665149256
MMV_Model4	FCFP_6	SciTegic.value.IntegerFingerprintValue	G1217	-699287571	61	16696426	5	5	1.37784665149256
MMV_Model4	FCFP_6	SciTegic.value.IntegerFingerprintValue	G1218	408062394	91	16696426	6	6	1.37782450803938
MMV_Model4	FCFP_6	SciTegic.value.IntegerFingerprintValue	G1219	-1712711017	272	16696426	12	12	1.37520218645023
MMV_Model4	FCFP_6	SciTegic.value.IntegerFingerprintValue	G1220	-1087652354	62	16696426	5	5	1.37230561473119
MMV_Model4	FCFP_6	SciTegic.value.IntegerFingerprintValue	G1221	75474173	32	16696426	4	4	1.37123187855982
MMV_Model4	FCFP_6	SciTegic.value.IntegerFingerprintValue	G1222	2126920988	123	16696426	7	7	1.36950813721396
MMV_Model4	FCFP_6	SciTegic.value.IntegerFingerprintValue	G1223	570565623	244	16696426	11	11	1.36946970826648
MMV_Model4	FCFP_6	SciTegic.value.IntegerFingerprintValue	G1224	-1529771818	124	16696426	7	7	1.36538394558965
MMV_Model4	FCFP_6	SciTegic.value.IntegerFingerprintValue	G1225	1518798513	33	16696426	4	4	1.36462997886649
MMV_Model4	FCFP_6	SciTegic.value.IntegerFingerprintValue	G1226	954736797	33	16696426	4	4	1.36462997886649
MMV_Model4	FCFP_6	SciTegic.value.IntegerFingerprintValue	G1227	-251112040	185	16696426	9	9	1.36453820065515
MMV_Model4	FCFP_6	SciTegic.value.IntegerFingerprintValue	G1228	1524376545	337	16696426	14	14	1.36450760978977
MMV_Model4	FCFP_6	SciTegic.value.IntegerFingerprintValue	G1229	-1434319058	246	16696426	11	11	1.36397476781787
MMV_Model4	FCFP_6	SciTegic.value.IntegerFingerprintValue	G1230	477352742	3	16696426	3	3	1.3613910435807
MMV_Model4	FCFP_6	SciTegic.value.IntegerFingerprintValue	G1231	906459972	3	16696426	3	3	1.3613910435807
MMV_Model4	FCFP_6	SciTegic.value.IntegerFingerprintValue	G1232	1217402727	3	16696426	3	3	1.3613910435807
MMV_Model4	FCFP_6	SciTegic.value.IntegerFingerprintValue	G1233	264845293	3	16696426	3	3	1.3613910435807
MMV_Model4	FCFP_6	SciTegic.value.IntegerFingerprintValue	G1234	-1535345649	3	16696426	3	3	1.3613910435807
MMV_Model4	FCFP_6	SciTegic.value.IntegerFingerprintValue	G1235	-747217999	3	16696426	3	3	1.3613910435807
MMV_Model4	FCFP_6	SciTegic.value.IntegerFingerprintValue	G1236	-1348989851	3	16696426	3	3	1.3613910435807
MMV_Model4	FCFP_6	SciTegic.value.IntegerFingerprintValue	G1237	-1894909675	3	16696426	3	3	1.3613910435807
MMV_Model4	FCFP_6	SciTegic.value.IntegerFingerprintValue	G1238	1209530703	3	16696426	3	3	1.3613910435807
MMV_Model4	FCFP_6	SciTegic.value.IntegerFingerprintValue	G1239	1656239652	3	16696426	3	3	1.3613910435807
MMV_Model4	FCFP_6	SciTegic.value.IntegerFingerprintValue	G1240	445336383	3	16696426	3	3	1.3613910435807
MMV_Model4	FCFP_6	SciTegic.value.IntegerFingerprintValue	G1241	-70310835	3	16696426	3	3	1.3613910435807
MMV_Model4	FCFP_6	SciTegic.value.IntegerFingerprintValue	G1242	652804599	3	16696426	3	3	1.3613910435807
MMV_Model4	FCFP_6	SciTegic.value.IntegerFingerprintValue	G1243	438151610	3	16696426	3	3	1.3613910435807
MMV_Model4	FCFP_6	SciTegic.value.IntegerFingerprintValue	G1244	1205696890	3	16696426	3	3	1.3613910435807
MMV_Model4	FCFP_6	SciTegic.value.IntegerFingerprintValue	G1245	255491481	3	16696426	3	3	1.3613910435807
MMV_Model4	FCFP_6	SciTegic.value.IntegerFingerprintValue	G1246	-1438818460	3	16696426	3	3	1.3613910435807
MMV_Model4	FCFP_6	SciTegic.value.IntegerFingerprintValue	G1247	288266741	3	16696426	3	3	1.3613910435807
MMV_Model4	FCFP_6	SciTegic.value.IntegerFingerprintValue	G1248	837283051	3	16696426	3	3	1.3613910435807
MMV_Model4	FCFP_6	SciTegic.value.IntegerFingerprintValue	G1249	-1253666213	3	16696426	3	3	1.3613910435807
MMV_Model4	FCFP_6	SciTegic.value.IntegerFingerprintValue	G1250	-237582691	3	16696426	3	3	1.3613910435807
MMV_Model4	FCFP_6	SciTegic.value.IntegerFingerprintValue	G1251	-1222870260	64	16696426	5	5	1.36131480846444
MMV_Model4	FCFP_6	SciTegic.value.IntegerFingerprintValue	G1252	-1649279858	95	16696426	6	6	1.35895354038765
MMV_Model4	FCFP_6	SciTegic.value.IntegerFingerprintValue	G1253	-1017612566	95	16696426	6	6	1.35895354038765
MMV_Model4	FCFP_6	SciTegic.value.IntegerFingerprintValue	G1254	-2057983097	34	16696426	4	4	1.35807137855082
MMV_Model4	FCFP_6	SciTegic.value.IntegerFingerprintValue	G1255	-1642223577	34	16696426	4	4	1.35807137855082
MMV_Model4	FCFP_6	SciTegic.value.IntegerFingerprintValue	G1256	1285566916	187	16696426	9	9	1.3579802002791
MMV_Model4	FCFP_6	SciTegic.value.IntegerFingerprintValue	G1257	-1530022281	311	16696426	13	13	1.35422603844032
MMV_Model4	FCFP_6	SciTegic.value.IntegerFingerprintValue	G1258	-1975087927	434	16696426	17	17	1.35395324310151
MMV_Model4	FCFP_6	SciTegic.value.IntegerFingerprintValue	G1259	1175590665	219	16696426	10	10	1.35382095472116
MMV_Model4	FCFP_6	SciTegic.value.IntegerFingerprintValue	G1260	-1793918745	4	16696426	3	3	1.35322587347931
MMV_Model4	FCFP_6	SciTegic.value.IntegerFingerprintValue	G1261	-754490103	4	16696426	3	3	1.35322587347931
MMV_Model4	FCFP_6	SciTegic.value.IntegerFingerprintValue	G1262	1060685195	4	16696426	3	3	1.35322587347931
MMV_Model4	FCFP_6	SciTegic.value.IntegerFingerprintValue	G1263	-1981521505	4	16696426	3	3	1.35322587347931
MMV_Model4	FCFP_6	SciTegic.value.IntegerFingerprintValue	G1264	-826629625	4	16696426	3	3	1.35322587347931
MMV_Model4	FCFP_6	SciTegic.value.IntegerFingerprintValue	G1265	10203245	4	16696426	3	3	1.35322587347931
MMV_Model4	FCFP_6	SciTegic.value.IntegerFingerprintValue	G1266	-417448547	4	16696426	3	3	1.35322587347931
MMV_Model4	FCFP_6	SciTegic.value.IntegerFingerprintValue	G1267	654738746	4	16696426	3	3	1.35322587347931
MMV_Model4	FCFP_6	SciTegic.value.IntegerFingerprintValue	G1268	620505683	4	16696426	3	3	1.35322587347931
MMV_Model4	FCFP_6	SciTegic.value.IntegerFingerprintValue	G1269	1463900957	35	16696426	4	4	1.35155551334294
MMV_Model4	FCFP_6	SciTegic.value.IntegerFingerprintValue	G1270	-1238787704	66	16696426	5	5	1.35044348796488
MMV_Model4	FCFP_6	SciTegic.value.IntegerFingerprintValue	G1271	-319873803	313	16696426	13	13	1.34958535851192
MMV_Model4	FCFP_6	SciTegic.value.IntegerFingerprintValue	G1272	-1406391431	746	16696426	27	27	1.3483962936034
MMV_Model4	FCFP_6	SciTegic.value.IntegerFingerprintValue	G1273	-345798579	376	16696426	15	15	1.34697635757959
MMV_Model4	FCFP_6	SciTegic.value.IntegerFingerprintValue	G1274	-1344578999	748	16696426	27	27	1.34608674935658
MMV_Model4	FCFP_6	SciTegic.value.IntegerFingerprintValue	G1275	-256481624	5	16696426	3	3	1.34512683377916
MMV_Model4	FCFP_6	SciTegic.value.IntegerFingerprintValue	G1276	-1894265182	5	16696426	3	3	1.34512683377916
MMV_Model4	FCFP_6	SciTegic.value.IntegerFingerprintValue	G1277	-940840792	5	16696426	3	3	1.34512683377916
MMV_Model4	FCFP_6	SciTegic.value.IntegerFingerprintValue	G1278	-1373721104	5	16696426	3	3	1.34512683377916
MMV_Model4	FCFP_6	SciTegic.value.IntegerFingerprintValue	G1279	277248795	5	16696426	3	3	1.34512683377916
MMV_Model4	FCFP_6	SciTegic.value.IntegerFingerprintValue	G1280	1410725823	5	16696426	3	3	1.34512683377916
MMV_Model4	FCFP_6	SciTegic.value.IntegerFingerprintValue	G1281	2104108416	5	16696426	3	3	1.34512683377916
MMV_Model4	FCFP_6	SciTegic.value.IntegerFingerprintValue	G1282	1912145016	5	16696426	3	3	1.34512683377916
MMV_Model4	FCFP_6	SciTegic.value.IntegerFingerprintValue	G1283	991689604	5	16696426	3	3	1.34512683377916
MMV_Model4	FCFP_6	SciTegic.value.IntegerFingerprintValue	G1284	-2001920457	5	16696426	3	3	1.34512683377916
MMV_Model4	FCFP_6	SciTegic.value.IntegerFingerprintValue	G1285	1946781075	5	16696426	3	3	1.34512683377916
MMV_Model4	FCFP_6	SciTegic.value.IntegerFingerprintValue	G1286	-1152137710	5	16696426	3	3	1.34512683377916
MMV_Model4	FCFP_6	SciTegic.value.IntegerFingerprintValue	G1287	-1587524190	5	16696426	3	3	1.34512683377916
MMV_Model4	FCFP_6	SciTegic.value.IntegerFingerprintValue	G1288	-1124828881	5	16696426	3	3	1.34512683377916
MMV_Model4	FCFP_6	SciTegic.value.IntegerFingerprintValue	G1289	-1538966646	5	16696426	3	3	1.34512683377916
MMV_Model4	FCFP_6	SciTegic.value.IntegerFingerprintValue	G1290	658292880	5	16696426	3	3	1.34512683377916
MMV_Model4	FCFP_6	SciTegic.value.IntegerFingerprintValue	G1291	-73673435	5	16696426	3	3	1.34512683377916
MMV_Model4	FCFP_6	SciTegic.value.IntegerFingerprintValue	G1292	1339997685	5	16696426	3	3	1.34512683377916
MMV_Model4	FCFP_6	SciTegic.value.IntegerFingerprintValue	G1293	-72285379	5	16696426	3	3	1.34512683377916
MMV_Model4	FCFP_6	SciTegic.value.IntegerFingerprintValue	G1294	-1550776355	36	16696426	4	4	1.34508182993184
MMV_Model4	FCFP_6	SciTegic.value.IntegerFingerprintValue	G1295	-984704051	67	16696426	5	5	1.34505182849212
MMV_Model4	FCFP_6	SciTegic.value.IntegerFingerprintValue	G1296	-667224693	160	16696426	8	8	1.34500182809268
MMV_Model4	FCFP_6	SciTegic.value.IntegerFingerprintValue	G1297	1673930087	627	16696426	23	23	1.34225466520999
MMV_Model4	FCFP_6	SciTegic.value.IntegerFingerprintValue	G1298	1051817678	907	16696426	32	32	1.34200076518479
MMV_Model4	FCFP_6	SciTegic.value.IntegerFingerprintValue	G1299	156055490	130	16696426	7	7	1.34098972585335
MMV_Model4	FCFP_6	SciTegic.value.IntegerFingerprintValue	G1300	1785498268	130	16696426	7	7	1.34098972585335
MMV_Model4	FCFP_6	SciTegic.value.IntegerFingerprintValue	G1301	-1057214286	68	16696426	5	5	1.33968908318555
MMV_Model4	FCFP_6	SciTegic.value.IntegerFingerprintValue	G1302	-1004617947	68	16696426	5	5	1.33968908318555
MMV_Model4	FCFP_6	SciTegic.value.IntegerFingerprintValue	G1303	-1845315000	68	16696426	5	5	1.33968908318555
MMV_Model4	FCFP_6	SciTegic.value.IntegerFingerprintValue	G1304	-1092669594	193	16696426	9	9	1.33856036107517
MMV_Model4	FCFP_6	SciTegic.value.IntegerFingerprintValue	G1305	-358961058	505	16696426	19	19	1.33851565176967
MMV_Model4	FCFP_6	SciTegic.value.IntegerFingerprintValue	G1306	242220459	6	16696426	3	3	1.33709286188912
MMV_Model4	FCFP_6	SciTegic.value.IntegerFingerprintValue	G1307	1117673594	6	16696426	3	3	1.33709286188912
MMV_Model4	FCFP_6	SciTegic.value.IntegerFingerprintValue	G1308	-1888171619	6	16696426	3	3	1.33709286188912
MMV_Model4	FCFP_6	SciTegic.value.IntegerFingerprintValue	G1309	1155963413	6	16696426	3	3	1.33709286188912
MMV_Model4	FCFP_6	SciTegic.value.IntegerFingerprintValue	G1310	939055661	6	16696426	3	3	1.33709286188912
MMV_Model4	FCFP_6	SciTegic.value.IntegerFingerprintValue	G1311	-612309162	6	16696426	3	3	1.33709286188912
MMV_Model4	FCFP_6	SciTegic.value.IntegerFingerprintValue	G1312	1027222846	6	16696426	3	3	1.33709286188912
MMV_Model4	FCFP_6	SciTegic.value.IntegerFingerprintValue	G1313	908213772	6	16696426	3	3	1.33709286188912
MMV_Model4	FCFP_6	SciTegic.value.IntegerFingerprintValue	G1314	-15534328	6	16696426	3	3	1.33709286188912
MMV_Model4	FCFP_6	SciTegic.value.IntegerFingerprintValue	G1315	-166525344	131	16696426	7	7	1.33698125626536
MMV_Model4	FCFP_6	SciTegic.value.IntegerFingerprintValue	G1316	-1263001444	100	16696426	6	6	1.33585484898615
MMV_Model4	FCFP_6	SciTegic.value.IntegerFingerprintValue	G1317	-2070746948	38	16696426	4	4	1.33225884836734
MMV_Model4	FCFP_6	SciTegic.value.IntegerFingerprintValue	G1318	-47934480	38	16696426	4	4	1.33225884836734
MMV_Model4	FCFP_6	SciTegic.value.IntegerFingerprintValue	G1319	589658209	38	16696426	4	4	1.33225884836734
MMV_Model4	FCFP_6	SciTegic.value.IntegerFingerprintValue	G1320	-1077004579	38	16696426	4	4	1.33225884836734
MMV_Model4	FCFP_6	SciTegic.value.IntegerFingerprintValue	G1321	-2052105258	823	16696426	29	29	1.33211076117192
MMV_Model4	FCFP_6	SciTegic.value.IntegerFingerprintValue	G1322	-743171537	321	16696426	13	13	1.33123504566355
MMV_Model4	FCFP_6	SciTegic.value.IntegerFingerprintValue	G1323	-863416763	164	16696426	8	8	1.33076529886829
MMV_Model4	FCFP_6	SciTegic.value.IntegerFingerprintValue	G1324	-177745417	164	16696426	8	8	1.33076529886829
MMV_Model4	FCFP_6	SciTegic.value.IntegerFingerprintValue	G1325	911329429	7	16696426	3	3	1.32912292062482
MMV_Model4	FCFP_6	SciTegic.value.IntegerFingerprintValue	G1326	898148207	7	16696426	3	3	1.32912292062482
MMV_Model4	FCFP_6	SciTegic.value.IntegerFingerprintValue	G1327	-890320747	7	16696426	3	3	1.32912292062482
MMV_Model4	FCFP_6	SciTegic.value.IntegerFingerprintValue	G1328	-1345019242	7	16696426	3	3	1.32912292062482
MMV_Model4	FCFP_6	SciTegic.value.IntegerFingerprintValue	G1329	-953720882	7	16696426	3	3	1.32912292062482
MMV_Model4	FCFP_6	SciTegic.value.IntegerFingerprintValue	G1330	696467529	7	16696426	3	3	1.32912292062482
MMV_Model4	FCFP_6	SciTegic.value.IntegerFingerprintValue	G1331	1997731457	7	16696426	3	3	1.32912292062482
MMV_Model4	FCFP_6	SciTegic.value.IntegerFingerprintValue	G1332	1903358973	7	16696426	3	3	1.32912292062482
MMV_Model4	FCFP_6	SciTegic.value.IntegerFingerprintValue	G1333	315305741	7	16696426	3	3	1.32912292062482
MMV_Model4	FCFP_6	SciTegic.value.IntegerFingerprintValue	G1334	-997327942	7	16696426	3	3	1.32912292062482
MMV_Model4	FCFP_6	SciTegic.value.IntegerFingerprintValue	G1335	1613813322	7	16696426	3	3	1.32912292062482
MMV_Model4	FCFP_6	SciTegic.value.IntegerFingerprintValue	G1336	1365694568	7	16696426	3	3	1.32912292062482
MMV_Model4	FCFP_6	SciTegic.value.IntegerFingerprintValue	G1337	-1868528322	70	16696426	5	5	1.32904910611758
MMV_Model4	FCFP_6	SciTegic.value.IntegerFingerprintValue	G1338	782886909	70	16696426	5	5	1.32904910611758
MMV_Model4	FCFP_6	SciTegic.value.IntegerFingerprintValue	G1339	-346184887	70	16696426	5	5	1.32904910611758
MMV_Model4	FCFP_6	SciTegic.value.IntegerFingerprintValue	G1340	-776105264	70	16696426	5	5	1.32904910611758
MMV_Model4	FCFP_6	SciTegic.value.IntegerFingerprintValue	G1341	-1056576576	292	16696426	12	12	1.32531305981687
MMV_Model4	FCFP_6	SciTegic.value.IntegerFingerprintValue	G1342	1416355523	71	16696426	5	5	1.3237712720509
MMV_Model4	FCFP_6	SciTegic.value.IntegerFingerprintValue	G1343	-2024685337	71	16696426	5	5	1.3237712720509
MMV_Model4	FCFP_6	SciTegic.value.IntegerFingerprintValue	G1344	1781478411	71	16696426	5	5	1.3237712720509
MMV_Model4	FCFP_6	SciTegic.value.IntegerFingerprintValue	G1345	679321016	1214	16696426	41	41	1.32139226538586
MMV_Model4	FCFP_6	SciTegic.value.IntegerFingerprintValue	G1346	391045193	8	16696426	3	3	1.32121599740509
MMV_Model4	FCFP_6	SciTegic.value.IntegerFingerprintValue	G1347	-760325423	8	16696426	3	3	1.32121599740509
MMV_Model4	FCFP_6	SciTegic.value.IntegerFingerprintValue	G1348	-470865784	8	16696426	3	3	1.32121599740509
MMV_Model4	FCFP_6	SciTegic.value.IntegerFingerprintValue	G1349	-1549197135	8	16696426	3	3	1.32121599740509
MMV_Model4	FCFP_6	SciTegic.value.IntegerFingerprintValue	G1350	1476431414	8	16696426	3	3	1.32121599740509
MMV_Model4	FCFP_6	SciTegic.value.IntegerFingerprintValue	G1351	926544925	8	16696426	3	3	1.32121599740509
MMV_Model4	FCFP_6	SciTegic.value.IntegerFingerprintValue	G1352	-1492091369	8	16696426	3	3	1.32121599740509
MMV_Model4	FCFP_6	SciTegic.value.IntegerFingerprintValue	G1353	-1840917746	8	16696426	3	3	1.32121599740509
MMV_Model4	FCFP_6	SciTegic.value.IntegerFingerprintValue	G1354	837922774	389	16696426	15	15	1.32105123028179
MMV_Model4	FCFP_6	SciTegic.value.IntegerFingerprintValue	G1355	-831582950	40	16696426	4	4	1.31959821605398
MMV_Model4	FCFP_6	SciTegic.value.IntegerFingerprintValue	G1356	1058433850	40	16696426	4	4	1.31959821605398
MMV_Model4	FCFP_6	SciTegic.value.IntegerFingerprintValue	G1357	1848843229	40	16696426	4	4	1.31959821605398
MMV_Model4	FCFP_6	SciTegic.value.IntegerFingerprintValue	G1358	-1185797177	9	16696426	3	3	1.31337110347993
MMV_Model4	FCFP_6	SciTegic.value.IntegerFingerprintValue	G1359	106148359	9	16696426	3	3	1.31337110347993
MMV_Model4	FCFP_6	SciTegic.value.IntegerFingerprintValue	G1360	674742891	9	16696426	3	3	1.31337110347993
MMV_Model4	FCFP_6	SciTegic.value.IntegerFingerprintValue	G1361	890222058	9	16696426	3	3	1.31337110347993
MMV_Model4	FCFP_6	SciTegic.value.IntegerFingerprintValue	G1362	-63637348	9	16696426	3	3	1.31337110347993
MMV_Model4	FCFP_6	SciTegic.value.IntegerFingerprintValue	G1363	1670757675	9	16696426	3	3	1.31337110347993
MMV_Model4	FCFP_6	SciTegic.value.IntegerFingerprintValue	G1364	1061544418	9	16696426	3	3	1.31337110347993
MMV_Model4	FCFP_6	SciTegic.value.IntegerFingerprintValue	G1365	-2068677463	9	16696426	3	3	1.31337110347993
MMV_Model4	FCFP_6	SciTegic.value.IntegerFingerprintValue	G1366	-237494512	9	16696426	3	3	1.31337110347993
MMV_Model4	FCFP_6	SciTegic.value.IntegerFingerprintValue	G1367	1363343470	9	16696426	3	3	1.31337110347993
MMV_Model4	FCFP_6	SciTegic.value.IntegerFingerprintValue	G1368	-668766361	9	16696426	3	3	1.31337110347993
MMV_Model4	FCFP_6	SciTegic.value.IntegerFingerprintValue	G1369	-247639126	9	16696426	3	3	1.31337110347993
MMV_Model4	FCFP_6	SciTegic.value.IntegerFingerprintValue	G1370	-1010404562	9	16696426	3	3	1.31337110347993
MMV_Model4	FCFP_6	SciTegic.value.IntegerFingerprintValue	G1371	1736708136	9	16696426	3	3	1.31337110347993
MMV_Model4	FCFP_6	SciTegic.value.IntegerFingerprintValue	G1372	-1775285301	9	16696426	3	3	1.31337110347993
MMV_Model4	FCFP_6	SciTegic.value.IntegerFingerprintValue	G1373	944150645	9	16696426	3	3	1.31337110347993
MMV_Model4	FCFP_6	SciTegic.value.IntegerFingerprintValue	G1374	1507853186	9	16696426	3	3	1.31337110347993
MMV_Model4	FCFP_6	SciTegic.value.IntegerFingerprintValue	G1375	-885014368	9	16696426	3	3	1.31337110347993
MMV_Model4	FCFP_6	SciTegic.value.IntegerFingerprintValue	G1376	-455791278	9	16696426	3	3	1.31337110347993
MMV_Model4	FCFP_6	SciTegic.value.IntegerFingerprintValue	G1377	1248254148	9	16696426	3	3	1.31337110347993
MMV_Model4	FCFP_6	SciTegic.value.IntegerFingerprintValue	G1378	1801396495	9	16696426	3	3	1.31337110347993
MMV_Model4	FCFP_6	SciTegic.value.IntegerFingerprintValue	G1379	-1412879182	41	16696426	4	4	1.31332750627875
MMV_Model4	FCFP_6	SciTegic.value.IntegerFingerprintValue	G1380	301701855	41	16696426	4	4	1.31332750627875
MMV_Model4	FCFP_6	SciTegic.value.IntegerFingerprintValue	G1381	1243332831	41	16696426	4	4	1.31332750627875
MMV_Model4	FCFP_6	SciTegic.value.IntegerFingerprintValue	G1382	1798001285	41	16696426	4	4	1.31332750627875
MMV_Model4	FCFP_6	SciTegic.value.IntegerFingerprintValue	G1383	1216573671	41	16696426	4	4	1.31332750627875
MMV_Model4	FCFP_6	SciTegic.value.IntegerFingerprintValue	G1384	3758314	73	16696426	5	5	1.31329844253389
MMV_Model4	FCFP_6	SciTegic.value.IntegerFingerprintValue	G1385	542532285	105	16696426	6	6	1.31327768323327
MMV_Model4	FCFP_6	SciTegic.value.IntegerFingerprintValue	G1386	-994770622	105	16696426	6	6	1.31327768323327
MMV_Model4	FCFP_6	SciTegic.value.IntegerFingerprintValue	G1387	200456213	1258	16696426	42	42	1.31244691551593
MMV_Model4	FCFP_6	SciTegic.value.IntegerFingerprintValue	G1388	-879019572	74	16696426	5	5	1.30810287272125
MMV_Model4	FCFP_6	SciTegic.value.IntegerFingerprintValue	G1389	-1259919475	396	16696426	15	15	1.3073650307406
MMV_Model4	FCFP_6	SciTegic.value.IntegerFingerprintValue	G1390	-1855864237	396	16696426	15	15	1.3073650307406
MMV_Model4	FCFP_6	SciTegic.value.IntegerFingerprintValue	G1391	1559056674	203	16696426	9	9	1.30700922630652
MMV_Model4	FCFP_6	SciTegic.value.IntegerFingerprintValue	G1392	1954186798	171	16696426	8	8	1.3063288939018
MMV_Model4	FCFP_6	SciTegic.value.IntegerFingerprintValue	G1393	2082677336	10	16696426	3	3	1.30558727318847
MMV_Model4	FCFP_6	SciTegic.value.IntegerFingerprintValue	G1394	-2067283588	10	16696426	3	3	1.30558727318847
MMV_Model4	FCFP_6	SciTegic.value.IntegerFingerprintValue	G1395	-544687317	10	16696426	3	3	1.30558727318847
MMV_Model4	FCFP_6	SciTegic.value.IntegerFingerprintValue	G1396	1561453622	10	16696426	3	3	1.30558727318847
MMV_Model4	FCFP_6	SciTegic.value.IntegerFingerprintValue	G1397	-1381429672	10	16696426	3	3	1.30558727318847
MMV_Model4	FCFP_6	SciTegic.value.IntegerFingerprintValue	G1398	977336095	10	16696426	3	3	1.30558727318847
MMV_Model4	FCFP_6	SciTegic.value.IntegerFingerprintValue	G1399	-174493116	10	16696426	3	3	1.30558727318847
MMV_Model4	FCFP_6	SciTegic.value.IntegerFingerprintValue	G1400	-1193287223	10	16696426	3	3	1.30558727318847
MMV_Model4	FCFP_6	SciTegic.value.IntegerFingerprintValue	G1401	1430860541	10	16696426	3	3	1.30558727318847
MMV_Model4	FCFP_6	SciTegic.value.IntegerFingerprintValue	G1402	83963989	333	16696426	13	13	1.30432590940808
MMV_Model4	FCFP_6	SciTegic.value.IntegerFingerprintValue	G1403	1923250849	75	16696426	5	5	1.30293415739005
MMV_Model4	FCFP_6	SciTegic.value.IntegerFingerprintValue	G1404	-422699371	43	16696426	4	4	1.30090283338124
MMV_Model4	FCFP_6	SciTegic.value.IntegerFingerprintValue	G1405	-1598546084	43	16696426	4	4	1.30090283338124
MMV_Model4	FCFP_6	SciTegic.value.IntegerFingerprintValue	G1406	-1517917457	11	16696426	3	3	1.29786356324562
MMV_Model4	FCFP_6	SciTegic.value.IntegerFingerprintValue	G1407	-1196452596	11	16696426	3	3	1.29786356324562
MMV_Model4	FCFP_6	SciTegic.value.IntegerFingerprintValue	G1408	176919314	11	16696426	3	3	1.29786356324562
MMV_Model4	FCFP_6	SciTegic.value.IntegerFingerprintValue	G1409	-2030342675	11	16696426	3	3	1.29786356324562
MMV_Model4	FCFP_6	SciTegic.value.IntegerFingerprintValue	G1410	-337853716	11	16696426	3	3	1.29786356324562
MMV_Model4	FCFP_6	SciTegic.value.IntegerFingerprintValue	G1411	1195338106	11	16696426	3	3	1.29786356324562
MMV_Model4	FCFP_6	SciTegic.value.IntegerFingerprintValue	G1412	-2099305599	11	16696426	3	3	1.29786356324562
MMV_Model4	FCFP_6	SciTegic.value.IntegerFingerprintValue	G1413	949613979	11	16696426	3	3	1.29786356324562
MMV_Model4	FCFP_6	SciTegic.value.IntegerFingerprintValue	G1414	-1179960711	11	16696426	3	3	1.29786356324562
MMV_Model4	FCFP_6	SciTegic.value.IntegerFingerprintValue	G1415	63732884	11	16696426	3	3	1.29786356324562
MMV_Model4	FCFP_6	SciTegic.value.IntegerFingerprintValue	G1416	-520230619	11	16696426	3	3	1.29786356324562
MMV_Model4	FCFP_6	SciTegic.value.IntegerFingerprintValue	G1417	-1962616206	11	16696426	3	3	1.29786356324562
MMV_Model4	FCFP_6	SciTegic.value.IntegerFingerprintValue	G1418	-1500710857	11	16696426	3	3	1.29786356324562
MMV_Model4	FCFP_6	SciTegic.value.IntegerFingerprintValue	G1419	1684163430	76	16696426	5	5	1.29779202036023
MMV_Model4	FCFP_6	SciTegic.value.IntegerFingerprintValue	G1420	74595001	12994	16696426	402	402	1.29646834510661
MMV_Model4	FCFP_6	SciTegic.value.IntegerFingerprintValue	G1421	-487041764	402	16696426	15	15	1.29578126579681
MMV_Model4	FCFP_6	SciTegic.value.IntegerFingerprintValue	G1422	-1907592261	272	16696426	11	11	1.29515947877669
MMV_Model4	FCFP_6	SciTegic.value.IntegerFingerprintValue	G1423	-740014369	44	16696426	4	4	1.29474791117103
MMV_Model4	FCFP_6	SciTegic.value.IntegerFingerprintValue	G1424	2128816085	110	16696426	6	6	1.29119901200697
MMV_Model4	FCFP_6	SciTegic.value.IntegerFingerprintValue	G1425	-514449068	12	16696426	3	3	1.2901990520561
MMV_Model4	FCFP_6	SciTegic.value.IntegerFingerprintValue	G1426	153411750	12	16696426	3	3	1.2901990520561
MMV_Model4	FCFP_6	SciTegic.value.IntegerFingerprintValue	G1427	-183221767	12	16696426	3	3	1.2901990520561
MMV_Model4	FCFP_6	SciTegic.value.IntegerFingerprintValue	G1428	582741222	12	16696426	3	3	1.2901990520561
MMV_Model4	FCFP_6	SciTegic.value.IntegerFingerprintValue	G1429	571784979	12	16696426	3	3	1.2901990520561
MMV_Model4	FCFP_6	SciTegic.value.IntegerFingerprintValue	G1430	-1579274189	176	16696426	8	8	1.28923282995238
MMV_Model4	FCFP_6	SciTegic.value.IntegerFingerprintValue	G1431	-1667450081	45	16696426	4	4	1.28863064040466
MMV_Model4	FCFP_6	SciTegic.value.IntegerFingerprintValue	G1432	746671940	45	16696426	4	4	1.28863064040466
MMV_Model4	FCFP_6	SciTegic.value.IntegerFingerprintValue	G1433	32983469	45	16696426	4	4	1.28863064040466
MMV_Model4	FCFP_6	SciTegic.value.IntegerFingerprintValue	G1434	40825941	78	16696426	5	5	1.28758639759158
MMV_Model4	FCFP_6	SciTegic.value.IntegerFingerprintValue	G1435	782224797	78	16696426	5	5	1.28758639759158
MMV_Model4	FCFP_6	SciTegic.value.IntegerFingerprintValue	G1436	1656834500	78	16696426	5	5	1.28758639759158
MMV_Model4	FCFP_6	SciTegic.value.IntegerFingerprintValue	G1437	-1017189687	78	16696426	5	5	1.28758639759158
MMV_Model4	FCFP_6	SciTegic.value.IntegerFingerprintValue	G1438	487421321	78	16696426	5	5	1.28758639759158
MMV_Model4	FCFP_6	SciTegic.value.IntegerFingerprintValue	G1439	-259668939	78	16696426	5	5	1.28758639759158
MMV_Model4	FCFP_6	SciTegic.value.IntegerFingerprintValue	G1440	-1784009832	78	16696426	5	5	1.28758639759158
MMV_Model4	FCFP_6	SciTegic.value.IntegerFingerprintValue	G1441	-430840367	144	16696426	7	7	1.2862826256451
MMV_Model4	FCFP_6	SciTegic.value.IntegerFingerprintValue	G1442	-1924607822	507	16696426	18	18	1.28402221181342
MMV_Model4	FCFP_6	SciTegic.value.IntegerFingerprintValue	G1443	1864738076	13	16696426	3	3	1.28259283905446
MMV_Model4	FCFP_6	SciTegic.value.IntegerFingerprintValue	G1444	-991559109	13	16696426	3	3	1.28259283905446
MMV_Model4	FCFP_6	SciTegic.value.IntegerFingerprintValue	G1445	866856882	13	16696426	3	3	1.28259283905446
MMV_Model4	FCFP_6	SciTegic.value.IntegerFingerprintValue	G1446	1890060551	13	16696426	3	3	1.28259283905446
MMV_Model4	FCFP_6	SciTegic.value.IntegerFingerprintValue	G1447	-255863448	13	16696426	3	3	1.28259283905446
MMV_Model4	FCFP_6	SciTegic.value.IntegerFingerprintValue	G1448	1403936055	13	16696426	3	3	1.28259283905446
MMV_Model4	FCFP_6	SciTegic.value.IntegerFingerprintValue	G1449	-1108243050	13	16696426	3	3	1.28259283905446
MMV_Model4	FCFP_6	SciTegic.value.IntegerFingerprintValue	G1450	-1720116564	13	16696426	3	3	1.28259283905446
MMV_Model4	FCFP_6	SciTegic.value.IntegerFingerprintValue	G1451	-1656575345	13	16696426	3	3	1.28259283905446
MMV_Model4	FCFP_6	SciTegic.value.IntegerFingerprintValue	G1452	-928274894	13	16696426	3	3	1.28259283905446
MMV_Model4	FCFP_6	SciTegic.value.IntegerFingerprintValue	G1453	1899178444	13	16696426	3	3	1.28259283905446
MMV_Model4	FCFP_6	SciTegic.value.IntegerFingerprintValue	G1454	591959293	46	16696426	4	4	1.28255056323192
MMV_Model4	FCFP_6	SciTegic.value.IntegerFingerprintValue	G1455	-1091025182	79	16696426	5	5	1.28252238034311
MMV_Model4	FCFP_6	SciTegic.value.IntegerFingerprintValue	G1456	239792315	1600	16696426	51	51	1.28065098107628
MMV_Model4	FCFP_6	SciTegic.value.IntegerFingerprintValue	G1457	1576159694	113	16696426	6	6	1.2781820684481
MMV_Model4	FCFP_6	SciTegic.value.IntegerFingerprintValue	G1458	145037051	809	16696426	27	27	1.27809187825696
MMV_Model4	FCFP_6	SciTegic.value.IntegerFingerprintValue	G1459	846704869	1340	16696426	43	43	1.27759124530618
MMV_Model4	FCFP_6	SciTegic.value.IntegerFingerprintValue	G1460	-312902671	80	16696426	5	5	1.2774838782106
MMV_Model4	FCFP_6	SciTegic.value.IntegerFingerprintValue	G1461	71130841	445	16696426	16	16	1.27709759535735
MMV_Model4	FCFP_6	SciTegic.value.IntegerFingerprintValue	G1462	344848402	47	16696426	4	4	1.27650723010349
MMV_Model4	FCFP_6	SciTegic.value.IntegerFingerprintValue	G1463	1760877001	47	16696426	4	4	1.27650723010349
MMV_Model4	FCFP_6	SciTegic.value.IntegerFingerprintValue	G1464	2078312048	47	16696426	4	4	1.27650723010349
MMV_Model4	FCFP_6	SciTegic.value.IntegerFingerprintValue	G1465	1149207007	47	16696426	4	4	1.27650723010349
MMV_Model4	FCFP_6	SciTegic.value.IntegerFingerprintValue	G1466	-71513767	213	16696426	9	9	1.27642319319894
MMV_Model4	FCFP_6	SciTegic.value.IntegerFingerprintValue	G1467	1702002428	180	16696426	8	8	1.2757633476963
MMV_Model4	FCFP_6	SciTegic.value.IntegerFingerprintValue	G1468	526368292	14	16696426	3	3	1.27504404407011
MMV_Model4	FCFP_6	SciTegic.value.IntegerFingerprintValue	G1469	1685208191	14	16696426	3	3	1.27504404407011
MMV_Model4	FCFP_6	SciTegic.value.IntegerFingerprintValue	G1470	-764409947	14	16696426	3	3	1.27504404407011
MMV_Model4	FCFP_6	SciTegic.value.IntegerFingerprintValue	G1471	1766554978	14	16696426	3	3	1.27504404407011
MMV_Model4	FCFP_6	SciTegic.value.IntegerFingerprintValue	G1472	-1286701738	14	16696426	3	3	1.27504404407011
MMV_Model4	FCFP_6	SciTegic.value.IntegerFingerprintValue	G1473	1091271722	14	16696426	3	3	1.27504404407011
MMV_Model4	FCFP_6	SciTegic.value.IntegerFingerprintValue	G1474	551131321	14	16696426	3	3	1.27504404407011
MMV_Model4	FCFP_6	SciTegic.value.IntegerFingerprintValue	G1475	1681134496	14	16696426	3	3	1.27504404407011
MMV_Model4	FCFP_6	SciTegic.value.IntegerFingerprintValue	G1476	-1884301631	247	16696426	10	10	1.27422720216989
MMV_Model4	FCFP_6	SciTegic.value.IntegerFingerprintValue	G1477	1796123205	214	16696426	9	9	1.27341541978255
MMV_Model4	FCFP_6	SciTegic.value.IntegerFingerprintValue	G1478	276444784	81	16696426	5	5	1.27247063536602
MMV_Model4	FCFP_6	SciTegic.value.IntegerFingerprintValue	G1479	-1090763562	582	16696426	20	20	1.2709433863879
MMV_Model4	FCFP_6	SciTegic.value.IntegerFingerprintValue	G1480	2131681816	1350	16696426	43	43	1.27076048749297
MMV_Model4	FCFP_6	SciTegic.value.IntegerFingerprintValue	G1481	-126276420	15	16696426	3	3	1.26755180671608
MMV_Model4	FCFP_6	SciTegic.value.IntegerFingerprintValue	G1482	915634611	15	16696426	3	3	1.26755180671608
MMV_Model4	FCFP_6	SciTegic.value.IntegerFingerprintValue	G1483	359435916	82	16696426	5	5	1.26748239980976
MMV_Model4	FCFP_6	SciTegic.value.IntegerFingerprintValue	G1484	-124417342	49	16696426	4	4	1.26452903809602
MMV_Model4	FCFP_6	SciTegic.value.IntegerFingerprintValue	G1485	273607338	49	16696426	4	4	1.26452903809602
MMV_Model4	FCFP_6	SciTegic.value.IntegerFingerprintValue	G1486	-1507997188	49	16696426	4	4	1.26452903809602
MMV_Model4	FCFP_6	SciTegic.value.IntegerFingerprintValue	G1487	-2141941735	150	16696426	7	7	1.26372291207161
MMV_Model4	FCFP_6	SciTegic.value.IntegerFingerprintValue	G1488	256765210	386	16696426	14	14	1.26243605369205
MMV_Model4	FCFP_6	SciTegic.value.IntegerFingerprintValue	G1489	1735337471	319	16696426	12	12	1.26168317956944
MMV_Model4	FCFP_6	SciTegic.value.IntegerFingerprintValue	G1490	1600236611	16	16696426	3	3	1.26011528580052
MMV_Model4	FCFP_6	SciTegic.value.IntegerFingerprintValue	G1491	-2045883933	16	16696426	3	3	1.26011528580052
MMV_Model4	FCFP_6	SciTegic.value.IntegerFingerprintValue	G1492	-592522239	16	16696426	3	3	1.26011528580052
MMV_Model4	FCFP_6	SciTegic.value.IntegerFingerprintValue	G1493	2138659452	16	16696426	3	3	1.26011528580052
MMV_Model4	FCFP_6	SciTegic.value.IntegerFingerprintValue	G1494	-222252511	151	16696426	7	7	1.26001194854147
MMV_Model4	FCFP_6	SciTegic.value.IntegerFingerprintValue	G1495	152865946	151	16696426	7	7	1.26001194854147
MMV_Model4	FCFP_6	SciTegic.value.IntegerFingerprintValue	G1496	191694449	50	16696426	4	4	1.2585933198573
MMV_Model4	FCFP_6	SciTegic.value.IntegerFingerprintValue	G1497	-1167576511	50	16696426	4	4	1.2585933198573
MMV_Model4	FCFP_6	SciTegic.value.IntegerFingerprintValue	G1498	681715663	220	16696426	9	9	1.25555631953408
MMV_Model4	FCFP_6	SciTegic.value.IntegerFingerprintValue	G1499	603895466	17	16696426	3	3	1.25273365875996
MMV_Model4	FCFP_6	SciTegic.value.IntegerFingerprintValue	G1500	-695640609	17	16696426	3	3	1.25273365875996
MMV_Model4	FCFP_6	SciTegic.value.IntegerFingerprintValue	G1501	801928587	17	16696426	3	3	1.25273365875996
MMV_Model4	FCFP_6	SciTegic.value.IntegerFingerprintValue	G1502	1616924931	17	16696426	3	3	1.25273365875996
MMV_Model4	FCFP_6	SciTegic.value.IntegerFingerprintValue	G1503	141610029	51	16696426	4	4	1.25269262657356
MMV_Model4	FCFP_6	SciTegic.value.IntegerFingerprintValue	G1504	-1955796892	51	16696426	4	4	1.25269262657356
MMV_Model4	FCFP_6	SciTegic.value.IntegerFingerprintValue	G1505	-318344428	51	16696426	4	4	1.25269262657356
MMV_Model4	FCFP_6	SciTegic.value.IntegerFingerprintValue	G1506	-1363235849	51	16696426	4	4	1.25269262657356
MMV_Model4	FCFP_6	SciTegic.value.IntegerFingerprintValue	G1507	277371735	187	16696426	8	8	1.25261968462128
MMV_Model4	FCFP_6	SciTegic.value.IntegerFingerprintValue	G1508	-383563979	731	16696426	24	24	1.25256133488999
MMV_Model4	FCFP_6	SciTegic.value.IntegerFingerprintValue	G1509	-1123198676	256	16696426	10	10	1.24993268016894
MMV_Model4	FCFP_6	SciTegic.value.IntegerFingerprintValue	G1510	1776909633	188	16696426	8	8	1.24935674200242
MMV_Model4	FCFP_6	SciTegic.value.IntegerFingerprintValue	G1511	1196102463	154	16696426	7	7	1.24896097683993
MMV_Model4	FCFP_6	SciTegic.value.IntegerFingerprintValue	G1512	-1946988433	154	16696426	7	7	1.24896097683993
MMV_Model4	FCFP_6	SciTegic.value.IntegerFingerprintValue	G1513	932777903	154	16696426	7	7	1.24896097683993
MMV_Model4	FCFP_6	SciTegic.value.IntegerFingerprintValue	G1514	888000973	154	16696426	7	7	1.24896097683993
MMV_Model4	FCFP_6	SciTegic.value.IntegerFingerprintValue	G1515	867496812	86	16696426	5	5	1.24777462026589
MMV_Model4	FCFP_6	SciTegic.value.IntegerFingerprintValue	G1516	-1052624523	86	16696426	5	5	1.24777462026589
MMV_Model4	FCFP_6	SciTegic.value.IntegerFingerprintValue	G1517	-947295843	291	16696426	11	11	1.2477065725019
MMV_Model4	FCFP_6	SciTegic.value.IntegerFingerprintValue	G1518	1349391136	52	16696426	4	4	1.24682654732409
MMV_Model4	FCFP_6	SciTegic.value.IntegerFingerprintValue	G1519	307199485	52	16696426	4	4	1.24682654732409
MMV_Model4	FCFP_6	SciTegic.value.IntegerFingerprintValue	G1520	-138860232	52	16696426	4	4	1.24682654732409
MMV_Model4	FCFP_6	SciTegic.value.IntegerFingerprintValue	G1521	1602567068	497	16696426	17	17	1.24605912157527
MMV_Model4	FCFP_6	SciTegic.value.IntegerFingerprintValue	G1522	-1850753184	18	16696426	3	3	1.24540612111323
MMV_Model4	FCFP_6	SciTegic.value.IntegerFingerprintValue	G1523	-962265143	18	16696426	3	3	1.24540612111323
MMV_Model4	FCFP_6	SciTegic.value.IntegerFingerprintValue	G1524	145541468	18	16696426	3	3	1.24540612111323
MMV_Model4	FCFP_6	SciTegic.value.IntegerFingerprintValue	G1525	331428454	18	16696426	3	3	1.24540612111323
MMV_Model4	FCFP_6	SciTegic.value.IntegerFingerprintValue	G1526	-800483220	18	16696426	3	3	1.24540612111323
MMV_Model4	FCFP_6	SciTegic.value.IntegerFingerprintValue	G1527	-1046269564	155	16696426	7	7	1.24530429265773
MMV_Model4	FCFP_6	SciTegic.value.IntegerFingerprintValue	G1528	-1971868391	155	16696426	7	7	1.24530429265773
MMV_Model4	FCFP_6	SciTegic.value.IntegerFingerprintValue	G1529	-844178633	155	16696426	7	7	1.24530429265773
MMV_Model4	FCFP_6	SciTegic.value.IntegerFingerprintValue	G1530	1513074037	1424	16696426	44	44	1.24408575639263
MMV_Model4	FCFP_6	SciTegic.value.IntegerFingerprintValue	G1531	-223345296	53	16696426	4	4	1.24099467837756
MMV_Model4	FCFP_6	SciTegic.value.IntegerFingerprintValue	G1532	-1716027434	53	16696426	4	4	1.24099467837756
MMV_Model4	FCFP_6	SciTegic.value.IntegerFingerprintValue	G1533	-1314855151	53	16696426	4	4	1.24099467837756
MMV_Model4	FCFP_6	SciTegic.value.IntegerFingerprintValue	G1534	937419024	1327	16696426	41	41	1.24002154737758
MMV_Model4	FCFP_6	SciTegic.value.IntegerFingerprintValue	G1535	-519444053	191	16696426	8	8	1.23963131265496
MMV_Model4	FCFP_6	SciTegic.value.IntegerFingerprintValue	G1536	367803281	19	16696426	3	3	1.23813188593539
MMV_Model4	FCFP_6	SciTegic.value.IntegerFingerprintValue	G1537	-1774558349	19	16696426	3	3	1.23813188593539
MMV_Model4	FCFP_6	SciTegic.value.IntegerFingerprintValue	G1538	-303008560	19	16696426	3	3	1.23813188593539
MMV_Model4	FCFP_6	SciTegic.value.IntegerFingerprintValue	G1539	-674219120	88	16696426	5	5	1.23806449116242
MMV_Model4	FCFP_6	SciTegic.value.IntegerFingerprintValue	G1540	1477387436	1195	16696426	37	37	1.23566523057815
MMV_Model4	FCFP_6	SciTegic.value.IntegerFingerprintValue	G1541	-1199099268	296	16696426	11	11	1.23558439214521
MMV_Model4	FCFP_6	SciTegic.value.IntegerFingerprintValue	G1542	2107634460	366	16696426	13	13	1.23385499865331
MMV_Model4	FCFP_6	SciTegic.value.IntegerFingerprintValue	G1543	-737372222	20	16696426	3	3	1.2309101833505
MMV_Model4	FCFP_6	SciTegic.value.IntegerFingerprintValue	G1544	-515262555	20	16696426	3	3	1.2309101833505
MMV_Model4	FCFP_6	SciTegic.value.IntegerFingerprintValue	G1545	1283499812	20	16696426	3	3	1.2309101833505
MMV_Model4	FCFP_6	SciTegic.value.IntegerFingerprintValue	G1546	-1234255934	20	16696426	3	3	1.2309101833505
MMV_Model4	FCFP_6	SciTegic.value.IntegerFingerprintValue	G1547	-1828418947	20	16696426	3	3	1.2309101833505
MMV_Model4	FCFP_6	SciTegic.value.IntegerFingerprintValue	G1548	716886207	20	16696426	3	3	1.2309101833505
MMV_Model4	FCFP_6	SciTegic.value.IntegerFingerprintValue	G1549	-866051621	20	16696426	3	3	1.2309101833505
MMV_Model4	FCFP_6	SciTegic.value.IntegerFingerprintValue	G1550	-222967947	159	16696426	7	7	1.2308098202732
MMV_Model4	FCFP_6	SciTegic.value.IntegerFingerprintValue	G1551	1309205574	576	16696426	19	19	1.23074960726139
MMV_Model4	FCFP_6	SciTegic.value.IntegerFingerprintValue	G1552	190950556	194	16696426	8	8	1.22999955699787
MMV_Model4	FCFP_6	SciTegic.value.IntegerFingerprintValue	G1553	-1370789332	55	16696426	4	4	1.2294319914192
MMV_Model4	FCFP_6	SciTegic.value.IntegerFingerprintValue	G1554	-218521731	90	16696426	5	5	1.22844774265516
MMV_Model4	FCFP_6	SciTegic.value.IntegerFingerprintValue	G1555	539820705	195	16696426	8	8	1.22680947776071
MMV_Model4	FCFP_6	SciTegic.value.IntegerFingerprintValue	G1556	765104304	21	16696426	3	3	1.22374026004271
MMV_Model4	FCFP_6	SciTegic.value.IntegerFingerprintValue	G1557	199574363	21	16696426	3	3	1.22374026004271
MMV_Model4	FCFP_6	SciTegic.value.IntegerFingerprintValue	G1558	356420668	21	16696426	3	3	1.22374026004271
MMV_Model4	FCFP_6	SciTegic.value.IntegerFingerprintValue	G1559	1911222476	21	16696426	3	3	1.22374026004271
MMV_Model4	FCFP_6	SciTegic.value.IntegerFingerprintValue	G1560	1910333747	56	16696426	4	4	1.22370040041478
MMV_Model4	FCFP_6	SciTegic.value.IntegerFingerprintValue	G1561	-1357383586	56	16696426	4	4	1.22370040041478
MMV_Model4	FCFP_6	SciTegic.value.IntegerFingerprintValue	G1562	-226084705	56	16696426	4	4	1.22370040041478
MMV_Model4	FCFP_6	SciTegic.value.IntegerFingerprintValue	G1563	-11320116	126	16696426	6	6	1.22365484849965
MMV_Model4	FCFP_6	SciTegic.value.IntegerFingerprintValue	G1564	-1209578223	197	16696426	8	8	1.2204596877341
MMV_Model4	FCFP_6	SciTegic.value.IntegerFingerprintValue	G1565	2035532739	127	16696426	6	6	1.2195810601967
MMV_Model4	FCFP_6	SciTegic.value.IntegerFingerprintValue	G1566	1597579159	127	16696426	6	6	1.2195810601967
MMV_Model4	FCFP_6	SciTegic.value.IntegerFingerprintValue	G1567	952581133	127	16696426	6	6	1.2195810601967
MMV_Model4	FCFP_6	SciTegic.value.IntegerFingerprintValue	G1568	1828581075	127	16696426	6	6	1.2195810601967
MMV_Model4	FCFP_6	SciTegic.value.IntegerFingerprintValue	G1569	-338119771	57	16696426	4	4	1.21800147341797
MMV_Model4	FCFP_6	SciTegic.value.IntegerFingerprintValue	G1570	-795630915	339	16696426	12	12	1.21703012438429
MMV_Model4	FCFP_6	SciTegic.value.IntegerFingerprintValue	G1571	906266023	480	16696426	16	16	1.21688735848363
MMV_Model4	FCFP_6	SciTegic.value.IntegerFingerprintValue	G1572	1820377379	22	16696426	3	3	1.21662137878469
MMV_Model4	FCFP_6	SciTegic.value.IntegerFingerprintValue	G1573	-1492621996	22	16696426	3	3	1.21662137878469
MMV_Model4	FCFP_6	SciTegic.value.IntegerFingerprintValue	G1574	-1345024556	22	16696426	3	3	1.21662137878469
MMV_Model4	FCFP_6	SciTegic.value.IntegerFingerprintValue	G1575	776245524	22	16696426	3	3	1.21662137878469
MMV_Model4	FCFP_6	SciTegic.value.IntegerFingerprintValue	G1576	-746136097	22	16696426	3	3	1.21662137878469
MMV_Model4	FCFP_6	SciTegic.value.IntegerFingerprintValue	G1577	1056984706	22	16696426	3	3	1.21662137878469
MMV_Model4	FCFP_6	SciTegic.value.IntegerFingerprintValue	G1578	759450022	22	16696426	3	3	1.21662137878469
MMV_Model4	FCFP_6	SciTegic.value.IntegerFingerprintValue	G1579	-1757823879	22	16696426	3	3	1.21662137878469
MMV_Model4	FCFP_6	SciTegic.value.IntegerFingerprintValue	G1580	-1759415963	234	16696426	9	9	1.2150851060421
MMV_Model4	FCFP_6	SciTegic.value.IntegerFingerprintValue	G1581	-1973018677	199	16696426	8	8	1.21414996326675
MMV_Model4	FCFP_6	SciTegic.value.IntegerFingerprintValue	G1582	539885518	412	16696426	14	14	1.21222975674433
MMV_Model4	FCFP_6	SciTegic.value.IntegerFingerprintValue	G1583	1923773397	23	16696426	3	3	1.2095528179827
MMV_Model4	FCFP_6	SciTegic.value.IntegerFingerprintValue	G1584	263081960	23	16696426	3	3	1.2095528179827
MMV_Model4	FCFP_6	SciTegic.value.IntegerFingerprintValue	G1585	-1243119239	23	16696426	3	3	1.2095528179827
MMV_Model4	FCFP_6	SciTegic.value.IntegerFingerprintValue	G1586	685202463	165	16696426	7	7	1.20945457556457
MMV_Model4	FCFP_6	SciTegic.value.IntegerFingerprintValue	G1587	34686627	308	16696426	11	11	1.20707700990591
MMV_Model4	FCFP_6	SciTegic.value.IntegerFingerprintValue	G1588	-1713261659	2301	16696426	67	67	1.20688545294702
MMV_Model4	FCFP_6	SciTegic.value.IntegerFingerprintValue	G1589	1511557375	166	16696426	7	7	1.20593928876388
MMV_Model4	FCFP_6	SciTegic.value.IntegerFingerprintValue	G1590	542229141	95	16696426	5	5	1.20480286056039
MMV_Model4	FCFP_6	SciTegic.value.IntegerFingerprintValue	G1591	-897404457	24	16696426	3	3	1.20253387123767
MMV_Model4	FCFP_6	SciTegic.value.IntegerFingerprintValue	G1592	2037590932	24	16696426	3	3	1.20253387123767
MMV_Model4	FCFP_6	SciTegic.value.IntegerFingerprintValue	G1593	2029549883	24	16696426	3	3	1.20253387123767
MMV_Model4	FCFP_6	SciTegic.value.IntegerFingerprintValue	G1594	2011406122	24	16696426	3	3	1.20253387123767
MMV_Model4	FCFP_6	SciTegic.value.IntegerFingerprintValue	G1595	-1013324660	167	16696426	7	7	1.20243631592999
MMV_Model4	FCFP_6	SciTegic.value.IntegerFingerprintValue	G1596	2079917681	346	16696426	12	12	1.20186098593241
MMV_Model4	FCFP_6	SciTegic.value.IntegerFingerprintValue	G1597	835265122	60	16696426	4	4	1.20109700570312
MMV_Model4	FCFP_6	SciTegic.value.IntegerFingerprintValue	G1598	-39625007	60	16696426	4	4	1.20109700570312
MMV_Model4	FCFP_6	SciTegic.value.IntegerFingerprintValue	G1599	1163595569	60	16696426	4	4	1.20109700570312
MMV_Model4	FCFP_6	SciTegic.value.IntegerFingerprintValue	G1600	-1185167959	60	16696426	4	4	1.20109700570312
MMV_Model4	FCFP_6	SciTegic.value.IntegerFingerprintValue	G1601	329649298	60	16696426	4	4	1.20109700570312
MMV_Model4	FCFP_6	SciTegic.value.IntegerFingerprintValue	G1602	1092545117	669	16696426	21	21	1.20046880535448
MMV_Model4	FCFP_6	SciTegic.value.IntegerFingerprintValue	G1603	798856771	96	16696426	5	5	1.20014024105674
MMV_Model4	FCFP_6	SciTegic.value.IntegerFingerprintValue	G1604	1272554221	777	16696426	24	24	1.19985558640614
MMV_Model4	FCFP_6	SciTegic.value.IntegerFingerprintValue	G1605	481733380	204	16696426	8	8	1.19854766472488
MMV_Model4	FCFP_6	SciTegic.value.IntegerFingerprintValue	G1606	-1369560798	204	16696426	8	8	1.19854766472488
MMV_Model4	FCFP_6	SciTegic.value.IntegerFingerprintValue	G1607	2125895517	25	16696426	3	3	1.19556384692157
MMV_Model4	FCFP_6	SciTegic.value.IntegerFingerprintValue	G1608	-1104335144	25	16696426	3	3	1.19556384692157
MMV_Model4	FCFP_6	SciTegic.value.IntegerFingerprintValue	G1609	1306241680	25	16696426	3	3	1.19556384692157
MMV_Model4	FCFP_6	SciTegic.value.IntegerFingerprintValue	G1610	1008677542	25	16696426	3	3	1.19556384692157
MMV_Model4	FCFP_6	SciTegic.value.IntegerFingerprintValue	G1611	-822885475	61	16696426	4	4	1.1955250946986
MMV_Model4	FCFP_6	SciTegic.value.IntegerFingerprintValue	G1612	954357609	421	16696426	14	14	1.19542176277857
MMV_Model4	FCFP_6	SciTegic.value.IntegerFingerprintValue	G1613	1056025414	999	16696426	30	30	1.19360454271743
MMV_Model4	FCFP_6	SciTegic.value.IntegerFingerprintValue	G1614	477735428	422	16696426	14	14	1.1935715279945
MMV_Model4	FCFP_6	SciTegic.value.IntegerFingerprintValue	G1615	-1807626203	206	16696426	8	8	1.19237427407909
MMV_Model4	FCFP_6	SciTegic.value.IntegerFingerprintValue	G1616	652112351	387	16696426	13	13	1.19146483301491
MMV_Model4	FCFP_6	SciTegic.value.IntegerFingerprintValue	G1617	508096781	387	16696426	13	13	1.19146483301491
MMV_Model4	FCFP_6	SciTegic.value.IntegerFingerprintValue	G1618	-1529179653	857	16696426	26	26	1.19129190199924
MMV_Model4	FCFP_6	SciTegic.value.IntegerFingerprintValue	G1619	-1890284890	98	16696426	5	5	1.19087971961611
MMV_Model4	FCFP_6	SciTegic.value.IntegerFingerprintValue	G1620	-1541070527	62	16696426	4	4	1.18998405793723
MMV_Model4	FCFP_6	SciTegic.value.IntegerFingerprintValue	G1621	879090110	62	16696426	4	4	1.18998405793723
MMV_Model4	FCFP_6	SciTegic.value.IntegerFingerprintValue	G1622	-1521324797	26	16696426	3	3	1.18864206776845
MMV_Model4	FCFP_6	SciTegic.value.IntegerFingerprintValue	G1623	-1416551130	316	16696426	11	11	1.18851379046124
MMV_Model4	FCFP_6	SciTegic.value.IntegerFingerprintValue	G1624	-1030226324	135	16696426	6	6	1.18757475701529
MMV_Model4	FCFP_6	SciTegic.value.IntegerFingerprintValue	G1625	-2083162537	99	16696426	5	5	1.18628142058365
MMV_Model4	FCFP_6	SciTegic.value.IntegerFingerprintValue	G1626	-2043587442	99	16696426	5	5	1.18628142058365
MMV_Model4	FCFP_6	SciTegic.value.IntegerFingerprintValue	G1627	627572268	681	16696426	21	21	1.18535463649654
MMV_Model4	FCFP_6	SciTegic.value.IntegerFingerprintValue	G1628	-75349967	27	16696426	3	3	1.18176787047948
MMV_Model4	FCFP_6	SciTegic.value.IntegerFingerprintValue	G1629	-1640890304	27	16696426	3	3	1.18176787047948
MMV_Model4	FCFP_6	SciTegic.value.IntegerFingerprintValue	G1630	-1943210977	27	16696426	3	3	1.18176787047948
MMV_Model4	FCFP_6	SciTegic.value.IntegerFingerprintValue	G1631	31079014	100	16696426	5	5	1.18170416915889
MMV_Model4	FCFP_6	SciTegic.value.IntegerFingerprintValue	G1632	1299628955	429	16696426	14	14	1.18071486118053
MMV_Model4	FCFP_6	SciTegic.value.IntegerFingerprintValue	G1633	-202723353	320	16696426	11	11	1.17935982410554
MMV_Model4	FCFP_6	SciTegic.value.IntegerFingerprintValue	G1634	284042173	64	16696426	4	4	1.17899325167048
MMV_Model4	FCFP_6	SciTegic.value.IntegerFingerprintValue	G1635	-1037841813	64	16696426	4	4	1.17899325167048
MMV_Model4	FCFP_6	SciTegic.value.IntegerFingerprintValue	G1636	-1392693430	174	16696426	7	7	1.17825318717629
MMV_Model4	FCFP_6	SciTegic.value.IntegerFingerprintValue	G1637	-1375330350	248	16696426	9	9	1.17618830001103
MMV_Model4	FCFP_6	SciTegic.value.IntegerFingerprintValue	G1638	2067014620	28	16696426	3	3	1.17494060534157
MMV_Model4	FCFP_6	SciTegic.value.IntegerFingerprintValue	G1639	1901950846	28	16696426	3	3	1.17494060534157
MMV_Model4	FCFP_6	SciTegic.value.IntegerFingerprintValue	G1640	1742453286	28	16696426	3	3	1.17494060534157
MMV_Model4	FCFP_6	SciTegic.value.IntegerFingerprintValue	G1641	-2057637971	28	16696426	3	3	1.17494060534157
MMV_Model4	FCFP_6	SciTegic.value.IntegerFingerprintValue	G1642	854069639	28	16696426	3	3	1.17494060534157
MMV_Model4	FCFP_6	SciTegic.value.IntegerFingerprintValue	G1643	-48730942	28	16696426	3	3	1.17494060534157
MMV_Model4	FCFP_6	SciTegic.value.IntegerFingerprintValue	G1644	-1817013656	28	16696426	3	3	1.17494060534157
MMV_Model4	FCFP_6	SciTegic.value.IntegerFingerprintValue	G1645	-18280642	102	16696426	5	5	1.17261204452995
MMV_Model4	FCFP_6	SciTegic.value.IntegerFingerprintValue	G1646	2026740489	139	16696426	6	6	1.17194773614107
MMV_Model4	FCFP_6	SciTegic.value.IntegerFingerprintValue	G1647	-852486437	250	16696426	9	9	1.17075309199978
MMV_Model4	FCFP_6	SciTegic.value.IntegerFingerprintValue	G1648	964330906	29	16696426	3	3	1.16815963585881
MMV_Model4	FCFP_6	SciTegic.value.IntegerFingerprintValue	G1649	-11251597	29	16696426	3	3	1.16815963585881
MMV_Model4	FCFP_6	SciTegic.value.IntegerFingerprintValue	G1650	-236253365	29	16696426	3	3	1.16815963585881
MMV_Model4	FCFP_6	SciTegic.value.IntegerFingerprintValue	G1651	-624704633	29	16696426	3	3	1.16815963585881
MMV_Model4	FCFP_6	SciTegic.value.IntegerFingerprintValue	G1652	-109786778	66	16696426	4	4	1.16812193117093
MMV_Model4	FCFP_6	SciTegic.value.IntegerFingerprintValue	G1653	-232475260	66	16696426	4	4	1.16812193117093
MMV_Model4	FCFP_6	SciTegic.value.IntegerFingerprintValue	G1654	1975330994	66	16696426	4	4	1.16812193117093
MMV_Model4	FCFP_6	SciTegic.value.IntegerFingerprintValue	G1655	-307558437	141	16696426	6	6	1.16422485821231
MMV_Model4	FCFP_6	SciTegic.value.IntegerFingerprintValue	G1656	-1619056309	104	16696426	5	5	1.1636018423415
MMV_Model4	FCFP_6	SciTegic.value.IntegerFingerprintValue	G1657	938975220	67	16696426	4	4	1.16273027169816
MMV_Model4	FCFP_6	SciTegic.value.IntegerFingerprintValue	G1658	425291818	67	16696426	4	4	1.16273027169816
MMV_Model4	FCFP_6	SciTegic.value.IntegerFingerprintValue	G1659	261554858	216	16696426	8	8	1.16206636209515
MMV_Model4	FCFP_6	SciTegic.value.IntegerFingerprintValue	G1660	-1889948596	216	16696426	8	8	1.16206636209515
MMV_Model4	FCFP_6	SciTegic.value.IntegerFingerprintValue	G1661	2028566063	30	16696426	3	3	1.16142433839643
MMV_Model4	FCFP_6	SciTegic.value.IntegerFingerprintValue	G1662	195803564	30	16696426	3	3	1.16142433839643
MMV_Model4	FCFP_6	SciTegic.value.IntegerFingerprintValue	G1663	1655240009	30	16696426	3	3	1.16142433839643
MMV_Model4	FCFP_6	SciTegic.value.IntegerFingerprintValue	G1664	197634129	30	16696426	3	3	1.16142433839643
MMV_Model4	FCFP_6	SciTegic.value.IntegerFingerprintValue	G1665	-1193011066	30	16696426	3	3	1.16142433839643
MMV_Model4	FCFP_6	SciTegic.value.IntegerFingerprintValue	G1666	-2082572339	30	16696426	3	3	1.16142433839643
MMV_Model4	FCFP_6	SciTegic.value.IntegerFingerprintValue	G1667	1152241082	30	16696426	3	3	1.16142433839643
MMV_Model4	FCFP_6	SciTegic.value.IntegerFingerprintValue	G1668	325836504	142	16696426	6	6	1.16038567076863
MMV_Model4	FCFP_6	SciTegic.value.IntegerFingerprintValue	G1669	-734883537	105	16696426	5	5	1.15912700340602
MMV_Model4	FCFP_6	SciTegic.value.IntegerFingerprintValue	G1670	1593284496	105	16696426	5	5	1.15912700340602
MMV_Model4	FCFP_6	SciTegic.value.IntegerFingerprintValue	G1671	1148987280	1900	16696426	53	53	1.15752928473072
MMV_Model4	FCFP_6	SciTegic.value.IntegerFingerprintValue	G1672	-425339696	68	16696426	4	4	1.1573675263916
MMV_Model4	FCFP_6	SciTegic.value.IntegerFingerprintValue	G1673	-1734598950	68	16696426	4	4	1.1573675263916
MMV_Model4	FCFP_6	SciTegic.value.IntegerFingerprintValue	G1674	-851574971	68	16696426	4	4	1.1573675263916
MMV_Model4	FCFP_6	SciTegic.value.IntegerFingerprintValue	G1675	-661764911	68	16696426	4	4	1.1573675263916
MMV_Model4	FCFP_6	SciTegic.value.IntegerFingerprintValue	G1676	-1044811133	68	16696426	4	4	1.1573675263916
MMV_Model4	FCFP_6	SciTegic.value.IntegerFingerprintValue	G1677	1804743636	3027	16696426	83	83	1.15582762190959
MMV_Model4	FCFP_6	SciTegic.value.IntegerFingerprintValue	G1678	1863797348	106	16696426	5	5	1.15467209948119
MMV_Model4	FCFP_6	SciTegic.value.IntegerFingerprintValue	G1679	88910045	256	16696426	9	9	1.15462250036461
MMV_Model4	FCFP_6	SciTegic.value.IntegerFingerprintValue	G1680	-374603508	444	16696426	14	14	1.15370916362094
MMV_Model4	FCFP_6	SciTegic.value.IntegerFingerprintValue	G1681	507780481	444	16696426	14	14	1.15370916362094
MMV_Model4	FCFP_6	SciTegic.value.IntegerFingerprintValue	G1682	-1201628941	444	16696426	14	14	1.15370916362094
MMV_Model4	FCFP_6	SciTegic.value.IntegerFingerprintValue	G1683	-596318770	445	16696426	14	14	1.15193445240334
MMV_Model4	FCFP_6	SciTegic.value.IntegerFingerprintValue	G1684	-361943406	1311	16696426	37	37	1.15106498414799
MMV_Model4	FCFP_6	SciTegic.value.IntegerFingerprintValue	G1685	-1665557374	107	16696426	5	5	1.15023695373707
MMV_Model4	FCFP_6	SciTegic.value.IntegerFingerprintValue	G1686	-598773896	220	16696426	8	8	1.15019580387626
MMV_Model4	FCFP_6	SciTegic.value.IntegerFingerprintValue	G1687	-1043131684	597	16696426	18	18	1.14968681416473
MMV_Model4	FCFP_6	SciTegic.value.IntegerFingerprintValue	G1688	1208707026	32	16696426	3	3	1.14808832724561
MMV_Model4	FCFP_6	SciTegic.value.IntegerFingerprintValue	G1689	2038372871	32	16696426	3	3	1.14808832724561
MMV_Model4	FCFP_6	SciTegic.value.IntegerFingerprintValue	G1690	632156824	32	16696426	3	3	1.14808832724561
MMV_Model4	FCFP_6	SciTegic.value.IntegerFingerprintValue	G1691	-1251706662	636	16696426	19	19	1.14794051358494
MMV_Model4	FCFP_6	SciTegic.value.IntegerFingerprintValue	G1692	1558984408	70	16696426	4	4	1.14672754932363
MMV_Model4	FCFP_6	SciTegic.value.IntegerFingerprintValue	G1693	813450284	108	16696426	5	5	1.14582139168615
MMV_Model4	FCFP_6	SciTegic.value.IntegerFingerprintValue	G1694	1392378738	146	16696426	6	6	1.14517463858987
MMV_Model4	FCFP_6	SciTegic.value.IntegerFingerprintValue	G1695	-2001621610	184	16696426	7	7	1.14468984812232
MMV_Model4	FCFP_6	SciTegic.value.IntegerFingerprintValue	G1696	-2036364024	222	16696426	8	8	1.14431295128692
MMV_Model4	FCFP_6	SciTegic.value.IntegerFingerprintValue	G1697	-1531994634	374	16696426	12	12	1.14338580996923
MMV_Model4	FCFP_6	SciTegic.value.IntegerFingerprintValue	G1698	1025490703	488	16696426	15	15	1.14299492989336
MMV_Model4	FCFP_6	SciTegic.value.IntegerFingerprintValue	G1699	-1824497452	33	16696426	3	3	1.14148642755228
MMV_Model4	FCFP_6	SciTegic.value.IntegerFingerprintValue	G1700	1537907409	33	16696426	3	3	1.14148642755228
MMV_Model4	FCFP_6	SciTegic.value.IntegerFingerprintValue	G1701	-1940974270	71	16696426	4	4	1.14144971525695
MMV_Model4	FCFP_6	SciTegic.value.IntegerFingerprintValue	G1702	-402299757	147	16696426	6	6	1.14140775999829
MMV_Model4	FCFP_6	SciTegic.value.IntegerFingerprintValue	G1703	200492893	147	16696426	6	6	1.14140775999829
MMV_Model4	FCFP_6	SciTegic.value.IntegerFingerprintValue	G1704	-1418650265	185	16696426	7	7	1.14139464934094
MMV_Model4	FCFP_6	SciTegic.value.IntegerFingerprintValue	G1705	-1724625252	451	16696426	14	14	1.14135182239142
MMV_Model4	FCFP_6	SciTegic.value.IntegerFingerprintValue	G1706	1741718193	452	16696426	14	14	1.13959888784766
MMV_Model4	FCFP_6	SciTegic.value.IntegerFingerprintValue	G1707	-1304934074	262	16696426	9	9	1.13874797960539
MMV_Model4	FCFP_6	SciTegic.value.IntegerFingerprintValue	G1708	-1527611932	1368	16696426	38	38	1.13795349953801
MMV_Model4	FCFP_6	SciTegic.value.IntegerFingerprintValue	G1709	574812047	148	16696426	6	6	1.13765501754856
MMV_Model4	FCFP_6	SciTegic.value.IntegerFingerprintValue	G1710	-1724956982	225	16696426	8	8	1.13555305769175
MMV_Model4	FCFP_6	SciTegic.value.IntegerFingerprintValue	G1711	1975516021	34	16696426	3	3	1.13492782723661
MMV_Model4	FCFP_6	SciTegic.value.IntegerFingerprintValue	G1712	1961621227	570	16696426	17	17	1.13406001571179
MMV_Model4	FCFP_6	SciTegic.value.IntegerFingerprintValue	G1713	1909138585	111	16696426	5	5	1.13269049709503
MMV_Model4	FCFP_6	SciTegic.value.IntegerFingerprintValue	G1714	-222349382	111	16696426	5	5	1.13269049709503
MMV_Model4	FCFP_6	SciTegic.value.IntegerFingerprintValue	G1715	1900170921	111	16696426	5	5	1.13269049709503
MMV_Model4	FCFP_6	SciTegic.value.IntegerFingerprintValue	G1716	-1757378719	571	16696426	17	17	1.13260963045245
MMV_Model4	FCFP_6	SciTegic.value.IntegerFingerprintValue	G1717	254339139	1261	16696426	35	35	1.13258941481354
MMV_Model4	FCFP_6	SciTegic.value.IntegerFingerprintValue	G1718	-1279490056	840	16696426	24	24	1.13190287908752
MMV_Model4	FCFP_6	SciTegic.value.IntegerFingerprintValue	G1719	-1036547699	150	16696426	6	6	1.13019151944709
MMV_Model4	FCFP_6	SciTegic.value.IntegerFingerprintValue	G1720	1511253995	419	16696426	13	13	1.13013966274501
MMV_Model4	FCFP_6	SciTegic.value.IntegerFingerprintValue	G1721	435905528	35	16696426	3	3	1.12841196202873
MMV_Model4	FCFP_6	SciTegic.value.IntegerFingerprintValue	G1722	-1112661008	35	16696426	3	3	1.12841196202873
MMV_Model4	FCFP_6	SciTegic.value.IntegerFingerprintValue	G1723	790845776	35	16696426	3	3	1.12841196202873
MMV_Model4	FCFP_6	SciTegic.value.IntegerFingerprintValue	G1724	21502455	497	16696426	15	15	1.12827608591889
MMV_Model4	FCFP_6	SciTegic.value.IntegerFingerprintValue	G1725	1748550873	151	16696426	6	6	1.12648055591695
MMV_Model4	FCFP_6	SciTegic.value.IntegerFingerprintValue	G1726	126527349	74	16696426	4	4	1.12578131592729
MMV_Model4	FCFP_6	SciTegic.value.IntegerFingerprintValue	G1727	1035685621	383	16696426	12	12	1.12529384977916
MMV_Model4	FCFP_6	SciTegic.value.IntegerFingerprintValue	G1728	634346494	268	16696426	9	9	1.12312152642946
MMV_Model4	FCFP_6	SciTegic.value.IntegerFingerprintValue	G1729	-878643953	36	16696426	3	3	1.12193827861763
MMV_Model4	FCFP_6	SciTegic.value.IntegerFingerprintValue	G1730	-1246350345	36	16696426	3	3	1.12193827861763
MMV_Model4	FCFP_6	SciTegic.value.IntegerFingerprintValue	G1731	-68508489	230	16696426	8	8	1.12112163094736
MMV_Model4	FCFP_6	SciTegic.value.IntegerFingerprintValue	G1732	1146244623	75	16696426	4	4	1.1206126005961
MMV_Model4	FCFP_6	SciTegic.value.IntegerFingerprintValue	G1733	524218711	75	16696426	4	4	1.1206126005961
MMV_Model4	FCFP_6	SciTegic.value.IntegerFingerprintValue	G1734	1801516237	75	16696426	4	4	1.1206126005961
MMV_Model4	FCFP_6	SciTegic.value.IntegerFingerprintValue	G1735	-909160600	37	16696426	3	3	1.11550623436917
MMV_Model4	FCFP_6	SciTegic.value.IntegerFingerprintValue	G1736	-810751495	37	16696426	3	3	1.11550623436917
MMV_Model4	FCFP_6	SciTegic.value.IntegerFingerprintValue	G1737	1584792922	37	16696426	3	3	1.11550623436917
MMV_Model4	FCFP_6	SciTegic.value.IntegerFingerprintValue	G1738	-178326389	37	16696426	3	3	1.11550623436917
MMV_Model4	FCFP_6	SciTegic.value.IntegerFingerprintValue	G1739	922605809	37	16696426	3	3	1.11550623436917
MMV_Model4	FCFP_6	SciTegic.value.IntegerFingerprintValue	G1740	1749434219	37	16696426	3	3	1.11550623436917
MMV_Model4	FCFP_6	SciTegic.value.IntegerFingerprintValue	G1741	1922467550	76	16696426	4	4	1.11547046356627
MMV_Model4	FCFP_6	SciTegic.value.IntegerFingerprintValue	G1742	2064578003	778	16696426	22	22	1.11535849367228
MMV_Model4	FCFP_6	SciTegic.value.IntegerFingerprintValue	G1743	317672088	468	16696426	14	14	1.11196194593359
MMV_Model4	FCFP_6	SciTegic.value.IntegerFingerprintValue	G1744	-67824264	508	16696426	15	15	1.11057571427665
MMV_Model4	FCFP_6	SciTegic.value.IntegerFingerprintValue	G1745	548255853	77	16696426	4	4	1.11035463289644
MMV_Model4	FCFP_6	SciTegic.value.IntegerFingerprintValue	G1746	1083227337	77	16696426	4	4	1.11035463289644
MMV_Model4	FCFP_6	SciTegic.value.IntegerFingerprintValue	G1747	-568834859	38	16696426	3	3	1.10911529705313
MMV_Model4	FCFP_6	SciTegic.value.IntegerFingerprintValue	G1748	-1473528041	156	16696426	6	6	1.10812953848834
MMV_Model4	FCFP_6	SciTegic.value.IntegerFingerprintValue	G1749	-1616845063	117	16696426	5	5	1.10693491697529
MMV_Model4	FCFP_6	SciTegic.value.IntegerFingerprintValue	G1750	86339004	78	16696426	4	4	1.10526484079763
MMV_Model4	FCFP_6	SciTegic.value.IntegerFingerprintValue	G1751	-1943668546	78	16696426	4	4	1.10526484079763
MMV_Model4	FCFP_6	SciTegic.value.IntegerFingerprintValue	G1752	-446103674	2129	16696426	56	56	1.10415650575637
MMV_Model4	FCFP_6	SciTegic.value.IntegerFingerprintValue	G1753	-162224989	39	16696426	3	3	1.10276494457895
MMV_Model4	FCFP_6	SciTegic.value.IntegerFingerprintValue	G1754	415939301	39	16696426	3	3	1.10276494457895
MMV_Model4	FCFP_6	SciTegic.value.IntegerFingerprintValue	G1755	1459150724	39	16696426	3	3	1.10276494457895
MMV_Model4	FCFP_6	SciTegic.value.IntegerFingerprintValue	G1756	409718890	39	16696426	3	3	1.10276494457895
MMV_Model4	FCFP_6	SciTegic.value.IntegerFingerprintValue	G1757	678723323	39	16696426	3	3	1.10276494457895
MMV_Model4	FCFP_6	SciTegic.value.IntegerFingerprintValue	G1758	873287266	39	16696426	3	3	1.10276494457895
MMV_Model4	FCFP_6	SciTegic.value.IntegerFingerprintValue	G1759	1342531070	39	16696426	3	3	1.10276494457895
MMV_Model4	FCFP_6	SciTegic.value.IntegerFingerprintValue	G1760	2008476094	39	16696426	3	3	1.10276494457895
MMV_Model4	FCFP_6	SciTegic.value.IntegerFingerprintValue	G1761	-1948920970	39	16696426	3	3	1.10276494457895
MMV_Model4	FCFP_6	SciTegic.value.IntegerFingerprintValue	G1762	1277031023	39	16696426	3	3	1.10276494457895
MMV_Model4	FCFP_6	SciTegic.value.IntegerFingerprintValue	G1763	-546875130	39	16696426	3	3	1.10276494457895
MMV_Model4	FCFP_6	SciTegic.value.IntegerFingerprintValue	G1764	-398057132	39	16696426	3	3	1.10276494457895
MMV_Model4	FCFP_6	SciTegic.value.IntegerFingerprintValue	G1765	-1476693188	39	16696426	3	3	1.10276494457895
MMV_Model4	FCFP_6	SciTegic.value.IntegerFingerprintValue	G1766	1500355046	118	16696426	5	5	1.10270608204529
MMV_Model4	FCFP_6	SciTegic.value.IntegerFingerprintValue	G1767	-210674273	79	16696426	4	4	1.10020082354916
MMV_Model4	FCFP_6	SciTegic.value.IntegerFingerprintValue	G1768	1033101923	79	16696426	4	4	1.10020082354916
MMV_Model4	FCFP_6	SciTegic.value.IntegerFingerprintValue	G1769	453358337	119	16696426	5	5	1.09849505488049
MMV_Model4	FCFP_6	SciTegic.value.IntegerFingerprintValue	G1770	-1778550482	238	16696426	8	8	1.09845598000526
MMV_Model4	FCFP_6	SciTegic.value.IntegerFingerprintValue	G1771	-790707509	1985	16696426	52	52	1.09759863796569
MMV_Model4	FCFP_6	SciTegic.value.IntegerFingerprintValue	G1772	-1576290616	159	16696426	6	6	1.09727842764868
MMV_Model4	FCFP_6	SciTegic.value.IntegerFingerprintValue	G1773	778368220	40	16696426	3	3	1.09645466473977
MMV_Model4	FCFP_6	SciTegic.value.IntegerFingerprintValue	G1774	-1433817023	40	16696426	3	3	1.09645466473977
MMV_Model4	FCFP_6	SciTegic.value.IntegerFingerprintValue	G1775	-213701705	40	16696426	3	3	1.09645466473977
MMV_Model4	FCFP_6	SciTegic.value.IntegerFingerprintValue	G1776	1562322440	40	16696426	3	3	1.09645466473977
MMV_Model4	FCFP_6	SciTegic.value.IntegerFingerprintValue	G1777	1514810630	40	16696426	3	3	1.09645466473977
MMV_Model4	FCFP_6	SciTegic.value.IntegerFingerprintValue	G1778	-1468718494	199	16696426	7	7	1.09636692761037
MMV_Model4	FCFP_6	SciTegic.value.IntegerFingerprintValue	G1779	-1576968628	676	16696426	19	19	1.09631428902744
MMV_Model4	FCFP_6	SciTegic.value.IntegerFingerprintValue	G1780	-1591550977	160	16696426	6	6	1.09368739981177
MMV_Model4	FCFP_6	SciTegic.value.IntegerFingerprintValue	G1781	43496414	41	16696426	3	3	1.09018395496454
MMV_Model4	FCFP_6	SciTegic.value.IntegerFingerprintValue	G1782	149132609	41	16696426	3	3	1.09018395496454
MMV_Model4	FCFP_6	SciTegic.value.IntegerFingerprintValue	G1783	529533269	41	16696426	3	3	1.09018395496454
MMV_Model4	FCFP_6	SciTegic.value.IntegerFingerprintValue	G1784	-121180333	41	16696426	3	3	1.09018395496454
MMV_Model4	FCFP_6	SciTegic.value.IntegerFingerprintValue	G1785	-1075976091	81	16696426	4	4	1.09014907857207
MMV_Model4	FCFP_6	SciTegic.value.IntegerFingerprintValue	G1786	-198170266	81	16696426	4	4	1.09014907857207
MMV_Model4	FCFP_6	SciTegic.value.IntegerFingerprintValue	G1787	1604236354	162	16696426	6	6	1.08654380056798
MMV_Model4	FCFP_6	SciTegic.value.IntegerFingerprintValue	G1788	1453909165	42	16696426	3	3	1.08395232207783
MMV_Model4	FCFP_6	SciTegic.value.IntegerFingerprintValue	G1789	254362037	42	16696426	3	3	1.08395232207783
MMV_Model4	FCFP_6	SciTegic.value.IntegerFingerprintValue	G1790	411414971	1452	16696426	38	38	1.08300080462125
MMV_Model4	FCFP_6	SciTegic.value.IntegerFingerprintValue	G1791	1500957800	163	16696426	6	6	1.0829910468839
MMV_Model4	FCFP_6	SciTegic.value.IntegerFingerprintValue	G1792	490832921	566	16696426	16	16	1.08272427106342
MMV_Model4	FCFP_6	SciTegic.value.IntegerFingerprintValue	G1793	180238585	284	16696426	9	9	1.08260679539119
MMV_Model4	FCFP_6	SciTegic.value.IntegerFingerprintValue	G1794	430506696	2	16696426	2	2	1.08194136046612
MMV_Model4	FCFP_6	SciTegic.value.IntegerFingerprintValue	G1795	-1600245617	2	16696426	2	2	1.08194136046612
MMV_Model4	FCFP_6	SciTegic.value.IntegerFingerprintValue	G1796	1170370418	2	16696426	2	2	1.08194136046612
MMV_Model4	FCFP_6	SciTegic.value.IntegerFingerprintValue	G1797	-1419415555	2	16696426	2	2	1.08194136046612
MMV_Model4	FCFP_6	SciTegic.value.IntegerFingerprintValue	G1798	-429758305	2	16696426	2	2	1.08194136046612
MMV_Model4	FCFP_6	SciTegic.value.IntegerFingerprintValue	G1799	-1455203881	2	16696426	2	2	1.08194136046612
MMV_Model4	FCFP_6	SciTegic.value.IntegerFingerprintValue	G1800	476275070	2	16696426	2	2	1.08194136046612
MMV_Model4	FCFP_6	SciTegic.value.IntegerFingerprintValue	G1801	-1464672610	2	16696426	2	2	1.08194136046612
MMV_Model4	FCFP_6	SciTegic.value.IntegerFingerprintValue	G1802	-162821504	2	16696426	2	2	1.08194136046612
MMV_Model4	FCFP_6	SciTegic.value.IntegerFingerprintValue	G1803	-1475073830	2	16696426	2	2	1.08194136046612
MMV_Model4	FCFP_6	SciTegic.value.IntegerFingerprintValue	G1804	569332741	2	16696426	2	2	1.08194136046612
MMV_Model4	FCFP_6	SciTegic.value.IntegerFingerprintValue	G1805	608635513	2	16696426	2	2	1.08194136046612
MMV_Model4	FCFP_6	SciTegic.value.IntegerFingerprintValue	G1806	1081186893	2	16696426	2	2	1.08194136046612
MMV_Model4	FCFP_6	SciTegic.value.IntegerFingerprintValue	G1807	1048530334	2	16696426	2	2	1.08194136046612
MMV_Model4	FCFP_6	SciTegic.value.IntegerFingerprintValue	G1808	-641498881	2	16696426	2	2	1.08194136046612
MMV_Model4	FCFP_6	SciTegic.value.IntegerFingerprintValue	G1809	792305450	2	16696426	2	2	1.08194136046612
MMV_Model4	FCFP_6	SciTegic.value.IntegerFingerprintValue	G1810	-470543128	2	16696426	2	2	1.08194136046612
MMV_Model4	FCFP_6	SciTegic.value.IntegerFingerprintValue	G1811	1274444285	2	16696426	2	2	1.08194136046612
MMV_Model4	FCFP_6	SciTegic.value.IntegerFingerprintValue	G1812	1629120111	2	16696426	2	2	1.08194136046612
MMV_Model4	FCFP_6	SciTegic.value.IntegerFingerprintValue	G1813	-47967026	2	16696426	2	2	1.08194136046612
MMV_Model4	FCFP_6	SciTegic.value.IntegerFingerprintValue	G1814	1464163734	2	16696426	2	2	1.08194136046612
MMV_Model4	FCFP_6	SciTegic.value.IntegerFingerprintValue	G1815	1426980560	2	16696426	2	2	1.08194136046612
MMV_Model4	FCFP_6	SciTegic.value.IntegerFingerprintValue	G1816	642697894	2	16696426	2	2	1.08194136046612
MMV_Model4	FCFP_6	SciTegic.value.IntegerFingerprintValue	G1817	-363034045	2	16696426	2	2	1.08194136046612
MMV_Model4	FCFP_6	SciTegic.value.IntegerFingerprintValue	G1818	2016708118	2	16696426	2	2	1.08194136046612
MMV_Model4	FCFP_6	SciTegic.value.IntegerFingerprintValue	G1819	-1665839831	2	16696426	2	2	1.08194136046612
MMV_Model4	FCFP_6	SciTegic.value.IntegerFingerprintValue	G1820	-734358959	2	16696426	2	2	1.08194136046612
MMV_Model4	FCFP_6	SciTegic.value.IntegerFingerprintValue	G1821	-859556261	2	16696426	2	2	1.08194136046612
MMV_Model4	FCFP_6	SciTegic.value.IntegerFingerprintValue	G1822	-1443997269	2	16696426	2	2	1.08194136046612
MMV_Model4	FCFP_6	SciTegic.value.IntegerFingerprintValue	G1823	-484072761	2	16696426	2	2	1.08194136046612
MMV_Model4	FCFP_6	SciTegic.value.IntegerFingerprintValue	G1824	1741747216	2	16696426	2	2	1.08194136046612
MMV_Model4	FCFP_6	SciTegic.value.IntegerFingerprintValue	G1825	-1914011153	2	16696426	2	2	1.08194136046612
MMV_Model4	FCFP_6	SciTegic.value.IntegerFingerprintValue	G1826	-775817315	2	16696426	2	2	1.08194136046612
MMV_Model4	FCFP_6	SciTegic.value.IntegerFingerprintValue	G1827	-493940394	2	16696426	2	2	1.08194136046612
MMV_Model4	FCFP_6	SciTegic.value.IntegerFingerprintValue	G1828	677398866	2	16696426	2	2	1.08194136046612
MMV_Model4	FCFP_6	SciTegic.value.IntegerFingerprintValue	G1829	-1923497823	2	16696426	2	2	1.08194136046612
MMV_Model4	FCFP_6	SciTegic.value.IntegerFingerprintValue	G1830	-1673822988	2	16696426	2	2	1.08194136046612
MMV_Model4	FCFP_6	SciTegic.value.IntegerFingerprintValue	G1831	-1511072400	2	16696426	2	2	1.08194136046612
MMV_Model4	FCFP_6	SciTegic.value.IntegerFingerprintValue	G1832	429429024	2	16696426	2	2	1.08194136046612
MMV_Model4	FCFP_6	SciTegic.value.IntegerFingerprintValue	G1833	-1005601961	2	16696426	2	2	1.08194136046612
MMV_Model4	FCFP_6	SciTegic.value.IntegerFingerprintValue	G1834	-1824920824	2	16696426	2	2	1.08194136046612
MMV_Model4	FCFP_6	SciTegic.value.IntegerFingerprintValue	G1835	-281280583	2	16696426	2	2	1.08194136046612
MMV_Model4	FCFP_6	SciTegic.value.IntegerFingerprintValue	G1836	1779932270	2	16696426	2	2	1.08194136046612
MMV_Model4	FCFP_6	SciTegic.value.IntegerFingerprintValue	G1837	-332684946	2	16696426	2	2	1.08194136046612
MMV_Model4	FCFP_6	SciTegic.value.IntegerFingerprintValue	G1838	-1330238168	2	16696426	2	2	1.08194136046612
MMV_Model4	FCFP_6	SciTegic.value.IntegerFingerprintValue	G1839	910058581	2	16696426	2	2	1.08194136046612
MMV_Model4	FCFP_6	SciTegic.value.IntegerFingerprintValue	G1840	-1305538402	2	16696426	2	2	1.08194136046612
MMV_Model4	FCFP_6	SciTegic.value.IntegerFingerprintValue	G1841	952128332	2	16696426	2	2	1.08194136046612
MMV_Model4	FCFP_6	SciTegic.value.IntegerFingerprintValue	G1842	-1200121201	2	16696426	2	2	1.08194136046612
MMV_Model4	FCFP_6	SciTegic.value.IntegerFingerprintValue	G1843	1958686763	2	16696426	2	2	1.08194136046612
MMV_Model4	FCFP_6	SciTegic.value.IntegerFingerprintValue	G1844	-319035555	2	16696426	2	2	1.08194136046612
MMV_Model4	FCFP_6	SciTegic.value.IntegerFingerprintValue	G1845	614560583	2	16696426	2	2	1.08194136046612
MMV_Model4	FCFP_6	SciTegic.value.IntegerFingerprintValue	G1846	-360180692	123	16696426	5	5	1.08182606476218
MMV_Model4	FCFP_6	SciTegic.value.IntegerFingerprintValue	G1847	-478171129	123	16696426	5	5	1.08182606476218
MMV_Model4	FCFP_6	SciTegic.value.IntegerFingerprintValue	G1848	534954333	123	16696426	5	5	1.08182606476218
MMV_Model4	FCFP_6	SciTegic.value.IntegerFingerprintValue	G1849	-815148308	123	16696426	5	5	1.08182606476218
MMV_Model4	FCFP_6	SciTegic.value.IntegerFingerprintValue	G1850	-1450223986	123	16696426	5	5	1.08182606476218
MMV_Model4	FCFP_6	SciTegic.value.IntegerFingerprintValue	G1851	91785034	527	16696426	15	15	1.08072144246956
MMV_Model4	FCFP_6	SciTegic.value.IntegerFingerprintValue	G1852	88242513	527	16696426	15	15	1.08072144246956
MMV_Model4	FCFP_6	SciTegic.value.IntegerFingerprintValue	G1853	-1075107298	1176	16696426	31	31	1.07838051005746
MMV_Model4	FCFP_6	SciTegic.value.IntegerFingerprintValue	G1854	-1161511570	650	16696426	18	18	1.07827332623673
MMV_Model4	FCFP_6	SciTegic.value.IntegerFingerprintValue	G1855	487144463	43	16696426	3	3	1.07775928206703
MMV_Model4	FCFP_6	SciTegic.value.IntegerFingerprintValue	G1856	-1086177180	43	16696426	3	3	1.07775928206703
MMV_Model4	FCFP_6	SciTegic.value.IntegerFingerprintValue	G1857	-194375439	124	16696426	5	5	1.07770187313787
MMV_Model4	FCFP_6	SciTegic.value.IntegerFingerprintValue	G1858	-255763205	124	16696426	5	5	1.07770187313787
MMV_Model4	FCFP_6	SciTegic.value.IntegerFingerprintValue	G1859	1900538950	205	16696426	7	7	1.07767316990916
MMV_Model4	FCFP_6	SciTegic.value.IntegerFingerprintValue	G1860	789148918	732	16696426	20	20	1.07703213008891
MMV_Model4	FCFP_6	SciTegic.value.IntegerFingerprintValue	G1861	1440753951	408	16696426	12	12	1.07669078458219
MMV_Model4	FCFP_6	SciTegic.value.IntegerFingerprintValue	G1862	690540968	773	16696426	21	21	1.07649663491325
MMV_Model4	FCFP_6	SciTegic.value.IntegerFingerprintValue	G1863	-514950620	165	16696426	6	6	1.07592318294005
MMV_Model4	FCFP_6	SciTegic.value.IntegerFingerprintValue	G1864	-45222333	1423	16696426	37	37	1.07565773631353
MMV_Model4	FCFP_6	SciTegic.value.IntegerFingerprintValue	G1865	-726272172	1546	16696426	40	40	1.07489745850482
MMV_Model4	FCFP_6	SciTegic.value.IntegerFingerprintValue	G1866	1904506946	3	16696426	2	2	1.07370897112892
MMV_Model4	FCFP_6	SciTegic.value.IntegerFingerprintValue	G1867	1957950675	3	16696426	2	2	1.07370897112892
MMV_Model4	FCFP_6	SciTegic.value.IntegerFingerprintValue	G1868	-205522820	3	16696426	2	2	1.07370897112892
MMV_Model4	FCFP_6	SciTegic.value.IntegerFingerprintValue	G1869	-643134144	3	16696426	2	2	1.07370897112892
MMV_Model4	FCFP_6	SciTegic.value.IntegerFingerprintValue	G1870	-595051360	3	16696426	2	2	1.07370897112892
MMV_Model4	FCFP_6	SciTegic.value.IntegerFingerprintValue	G1871	-385307823	3	16696426	2	2	1.07370897112892
MMV_Model4	FCFP_6	SciTegic.value.IntegerFingerprintValue	G1872	195306709	3	16696426	2	2	1.07370897112892
MMV_Model4	FCFP_6	SciTegic.value.IntegerFingerprintValue	G1873	709852647	3	16696426	2	2	1.07370897112892
MMV_Model4	FCFP_6	SciTegic.value.IntegerFingerprintValue	G1874	1713445939	3	16696426	2	2	1.07370897112892
MMV_Model4	FCFP_6	SciTegic.value.IntegerFingerprintValue	G1875	746818737	3	16696426	2	2	1.07370897112892
MMV_Model4	FCFP_6	SciTegic.value.IntegerFingerprintValue	G1876	-1427746706	3	16696426	2	2	1.07370897112892
MMV_Model4	FCFP_6	SciTegic.value.IntegerFingerprintValue	G1877	-363776050	3	16696426	2	2	1.07370897112892
MMV_Model4	FCFP_6	SciTegic.value.IntegerFingerprintValue	G1878	-2010268185	3	16696426	2	2	1.07370897112892
MMV_Model4	FCFP_6	SciTegic.value.IntegerFingerprintValue	G1879	1018535141	3	16696426	2	2	1.07370897112892
MMV_Model4	FCFP_6	SciTegic.value.IntegerFingerprintValue	G1880	1873047581	3	16696426	2	2	1.07370897112892
MMV_Model4	FCFP_6	SciTegic.value.IntegerFingerprintValue	G1881	24350993	3	16696426	2	2	1.07370897112892
MMV_Model4	FCFP_6	SciTegic.value.IntegerFingerprintValue	G1882	-1345168607	3	16696426	2	2	1.07370897112892
MMV_Model4	FCFP_6	SciTegic.value.IntegerFingerprintValue	G1883	-1326410692	3	16696426	2	2	1.07370897112892
MMV_Model4	FCFP_6	SciTegic.value.IntegerFingerprintValue	G1884	-607893819	3	16696426	2	2	1.07370897112892
MMV_Model4	FCFP_6	SciTegic.value.IntegerFingerprintValue	G1885	888447310	3	16696426	2	2	1.07370897112892
MMV_Model4	FCFP_6	SciTegic.value.IntegerFingerprintValue	G1886	-291161273	3	16696426	2	2	1.07370897112892
MMV_Model4	FCFP_6	SciTegic.value.IntegerFingerprintValue	G1887	1930153322	3	16696426	2	2	1.07370897112892
MMV_Model4	FCFP_6	SciTegic.value.IntegerFingerprintValue	G1888	-764420212	3	16696426	2	2	1.07370897112892
MMV_Model4	FCFP_6	SciTegic.value.IntegerFingerprintValue	G1889	908715895	3	16696426	2	2	1.07370897112892
MMV_Model4	FCFP_6	SciTegic.value.IntegerFingerprintValue	G1890	-612157304	3	16696426	2	2	1.07370897112892
MMV_Model4	FCFP_6	SciTegic.value.IntegerFingerprintValue	G1891	2143817776	3	16696426	2	2	1.07370897112892
MMV_Model4	FCFP_6	SciTegic.value.IntegerFingerprintValue	G1892	229879289	3	16696426	2	2	1.07370897112892
MMV_Model4	FCFP_6	SciTegic.value.IntegerFingerprintValue	G1893	-1393530525	3	16696426	2	2	1.07370897112892
MMV_Model4	FCFP_6	SciTegic.value.IntegerFingerprintValue	G1894	-1805898614	3	16696426	2	2	1.07370897112892
MMV_Model4	FCFP_6	SciTegic.value.IntegerFingerprintValue	G1895	-651585726	3	16696426	2	2	1.07370897112892
MMV_Model4	FCFP_6	SciTegic.value.IntegerFingerprintValue	G1896	606971989	3	16696426	2	2	1.07370897112892
MMV_Model4	FCFP_6	SciTegic.value.IntegerFingerprintValue	G1897	-588563822	3	16696426	2	2	1.07370897112892
MMV_Model4	FCFP_6	SciTegic.value.IntegerFingerprintValue	G1898	344654317	3	16696426	2	2	1.07370897112892
MMV_Model4	FCFP_6	SciTegic.value.IntegerFingerprintValue	G1899	-1559549150	3	16696426	2	2	1.07370897112892
MMV_Model4	FCFP_6	SciTegic.value.IntegerFingerprintValue	G1900	1603843394	3	16696426	2	2	1.07370897112892
MMV_Model4	FCFP_6	SciTegic.value.IntegerFingerprintValue	G1901	-801481581	3	16696426	2	2	1.07370897112892
MMV_Model4	FCFP_6	SciTegic.value.IntegerFingerprintValue	G1902	-1880906856	3	16696426	2	2	1.07370897112892
MMV_Model4	FCFP_6	SciTegic.value.IntegerFingerprintValue	G1903	1672157914	3	16696426	2	2	1.07370897112892
MMV_Model4	FCFP_6	SciTegic.value.IntegerFingerprintValue	G1904	-1612016965	492	16696426	14	14	1.07188793975673
MMV_Model4	FCFP_6	SciTegic.value.IntegerFingerprintValue	G1905	-1021112509	44	16696426	3	3	1.07160435985682
MMV_Model4	FCFP_6	SciTegic.value.IntegerFingerprintValue	G1906	-120827121	44	16696426	3	3	1.07160435985682
MMV_Model4	FCFP_6	SciTegic.value.IntegerFingerprintValue	G1907	1029438947	44	16696426	3	3	1.07160435985682
MMV_Model4	FCFP_6	SciTegic.value.IntegerFingerprintValue	G1908	1395063417	44	16696426	3	3	1.07160435985682
MMV_Model4	FCFP_6	SciTegic.value.IntegerFingerprintValue	G1909	-226816597	44	16696426	3	3	1.07160435985682
MMV_Model4	FCFP_6	SciTegic.value.IntegerFingerprintValue	G1910	1137786350	85	16696426	4	4	1.07034371592399
MMV_Model4	FCFP_6	SciTegic.value.IntegerFingerprintValue	G1911	-254791924	126	16696426	5	5	1.06950416867239
MMV_Model4	FCFP_6	SciTegic.value.IntegerFingerprintValue	G1912	-2107894542	4	16696426	2	2	1.06554380102753
MMV_Model4	FCFP_6	SciTegic.value.IntegerFingerprintValue	G1913	1568408846	4	16696426	2	2	1.06554380102753
MMV_Model4	FCFP_6	SciTegic.value.IntegerFingerprintValue	G1914	-222031517	4	16696426	2	2	1.06554380102753
MMV_Model4	FCFP_6	SciTegic.value.IntegerFingerprintValue	G1915	-1001564607	4	16696426	2	2	1.06554380102753
MMV_Model4	FCFP_6	SciTegic.value.IntegerFingerprintValue	G1916	-1351937959	4	16696426	2	2	1.06554380102753
MMV_Model4	FCFP_6	SciTegic.value.IntegerFingerprintValue	G1917	-1374070250	4	16696426	2	2	1.06554380102753
MMV_Model4	FCFP_6	SciTegic.value.IntegerFingerprintValue	G1918	488759527	4	16696426	2	2	1.06554380102753
MMV_Model4	FCFP_6	SciTegic.value.IntegerFingerprintValue	G1919	-617681944	4	16696426	2	2	1.06554380102753
MMV_Model4	FCFP_6	SciTegic.value.IntegerFingerprintValue	G1920	-2028563181	4	16696426	2	2	1.06554380102753
MMV_Model4	FCFP_6	SciTegic.value.IntegerFingerprintValue	G1921	-829597527	4	16696426	2	2	1.06554380102753
MMV_Model4	FCFP_6	SciTegic.value.IntegerFingerprintValue	G1922	-1448898919	4	16696426	2	2	1.06554380102753
MMV_Model4	FCFP_6	SciTegic.value.IntegerFingerprintValue	G1923	968298702	4	16696426	2	2	1.06554380102753
MMV_Model4	FCFP_6	SciTegic.value.IntegerFingerprintValue	G1924	-799910995	4	16696426	2	2	1.06554380102753
MMV_Model4	FCFP_6	SciTegic.value.IntegerFingerprintValue	G1925	-223134177	4	16696426	2	2	1.06554380102753
MMV_Model4	FCFP_6	SciTegic.value.IntegerFingerprintValue	G1926	2038458438	4	16696426	2	2	1.06554380102753
MMV_Model4	FCFP_6	SciTegic.value.IntegerFingerprintValue	G1927	-1083478087	4	16696426	2	2	1.06554380102753
MMV_Model4	FCFP_6	SciTegic.value.IntegerFingerprintValue	G1928	-264141799	4	16696426	2	2	1.06554380102753
MMV_Model4	FCFP_6	SciTegic.value.IntegerFingerprintValue	G1929	-2095367133	4	16696426	2	2	1.06554380102753
MMV_Model4	FCFP_6	SciTegic.value.IntegerFingerprintValue	G1930	-1111439157	4	16696426	2	2	1.06554380102753
MMV_Model4	FCFP_6	SciTegic.value.IntegerFingerprintValue	G1931	1340263556	4	16696426	2	2	1.06554380102753
MMV_Model4	FCFP_6	SciTegic.value.IntegerFingerprintValue	G1932	538318347	4	16696426	2	2	1.06554380102753
MMV_Model4	FCFP_6	SciTegic.value.IntegerFingerprintValue	G1933	112062029	4	16696426	2	2	1.06554380102753
MMV_Model4	FCFP_6	SciTegic.value.IntegerFingerprintValue	G1934	1848273468	4	16696426	2	2	1.06554380102753
MMV_Model4	FCFP_6	SciTegic.value.IntegerFingerprintValue	G1935	-1785183320	4	16696426	2	2	1.06554380102753
MMV_Model4	FCFP_6	SciTegic.value.IntegerFingerprintValue	G1936	332998767	4	16696426	2	2	1.06554380102753
MMV_Model4	FCFP_6	SciTegic.value.IntegerFingerprintValue	G1937	-1176469103	4	16696426	2	2	1.06554380102753
MMV_Model4	FCFP_6	SciTegic.value.IntegerFingerprintValue	G1938	-2065032266	4	16696426	2	2	1.06554380102753
MMV_Model4	FCFP_6	SciTegic.value.IntegerFingerprintValue	G1939	1757492484	4	16696426	2	2	1.06554380102753
MMV_Model4	FCFP_6	SciTegic.value.IntegerFingerprintValue	G1940	780015160	4	16696426	2	2	1.06554380102753
MMV_Model4	FCFP_6	SciTegic.value.IntegerFingerprintValue	G1941	1479662400	4	16696426	2	2	1.06554380102753
MMV_Model4	FCFP_6	SciTegic.value.IntegerFingerprintValue	G1942	192375373	4	16696426	2	2	1.06554380102753
MMV_Model4	FCFP_6	SciTegic.value.IntegerFingerprintValue	G1943	-1114262119	4	16696426	2	2	1.06554380102753
MMV_Model4	FCFP_6	SciTegic.value.IntegerFingerprintValue	G1944	1652437259	4	16696426	2	2	1.06554380102753
MMV_Model4	FCFP_6	SciTegic.value.IntegerFingerprintValue	G1945	-1576219119	4	16696426	2	2	1.06554380102753
MMV_Model4	FCFP_6	SciTegic.value.IntegerFingerprintValue	G1946	1282813769	4	16696426	2	2	1.06554380102753
MMV_Model4	FCFP_6	SciTegic.value.IntegerFingerprintValue	G1947	1861421971	4	16696426	2	2	1.06554380102753
MMV_Model4	FCFP_6	SciTegic.value.IntegerFingerprintValue	G1948	-1078617967	4	16696426	2	2	1.06554380102753
MMV_Model4	FCFP_6	SciTegic.value.IntegerFingerprintValue	G1949	1946865220	4	16696426	2	2	1.06554380102753
MMV_Model4	FCFP_6	SciTegic.value.IntegerFingerprintValue	G1950	-589192879	4	16696426	2	2	1.06554380102753
MMV_Model4	FCFP_6	SciTegic.value.IntegerFingerprintValue	G1951	1655719008	4	16696426	2	2	1.06554380102753
MMV_Model4	FCFP_6	SciTegic.value.IntegerFingerprintValue	G1952	-1902735153	4	16696426	2	2	1.06554380102753
MMV_Model4	FCFP_6	SciTegic.value.IntegerFingerprintValue	G1953	284656244	4	16696426	2	2	1.06554380102753
MMV_Model4	FCFP_6	SciTegic.value.IntegerFingerprintValue	G1954	1621533955	4	16696426	2	2	1.06554380102753
MMV_Model4	FCFP_6	SciTegic.value.IntegerFingerprintValue	G1955	-1428600109	4	16696426	2	2	1.06554380102753
MMV_Model4	FCFP_6	SciTegic.value.IntegerFingerprintValue	G1956	851837353	4	16696426	2	2	1.06554380102753
MMV_Model4	FCFP_6	SciTegic.value.IntegerFingerprintValue	G1957	-1625411347	4	16696426	2	2	1.06554380102753
MMV_Model4	FCFP_6	SciTegic.value.IntegerFingerprintValue	G1958	-206028096	4	16696426	2	2	1.06554380102753
MMV_Model4	FCFP_6	SciTegic.value.IntegerFingerprintValue	G1959	570076116	4	16696426	2	2	1.06554380102753
MMV_Model4	FCFP_6	SciTegic.value.IntegerFingerprintValue	G1960	-1580901836	4	16696426	2	2	1.06554380102753
MMV_Model4	FCFP_6	SciTegic.value.IntegerFingerprintValue	G1961	-2099217645	4	16696426	2	2	1.06554380102753
MMV_Model4	FCFP_6	SciTegic.value.IntegerFingerprintValue	G1962	1846607501	4	16696426	2	2	1.06554380102753
MMV_Model4	FCFP_6	SciTegic.value.IntegerFingerprintValue	G1963	-1193470162	4	16696426	2	2	1.06554380102753
MMV_Model4	FCFP_6	SciTegic.value.IntegerFingerprintValue	G1964	1155369806	4	16696426	2	2	1.06554380102753
MMV_Model4	FCFP_6	SciTegic.value.IntegerFingerprintValue	G1965	865485533	4	16696426	2	2	1.06554380102753
MMV_Model4	FCFP_6	SciTegic.value.IntegerFingerprintValue	G1966	2755942	4	16696426	2	2	1.06554380102753
MMV_Model4	FCFP_6	SciTegic.value.IntegerFingerprintValue	G1967	-1677295659	4	16696426	2	2	1.06554380102753
MMV_Model4	FCFP_6	SciTegic.value.IntegerFingerprintValue	G1968	1981863491	4	16696426	2	2	1.06554380102753
MMV_Model4	FCFP_6	SciTegic.value.IntegerFingerprintValue	G1969	1971654589	4	16696426	2	2	1.06554380102753
MMV_Model4	FCFP_6	SciTegic.value.IntegerFingerprintValue	G1970	2110315753	4	16696426	2	2	1.06554380102753
MMV_Model4	FCFP_6	SciTegic.value.IntegerFingerprintValue	G1971	2009923560	4	16696426	2	2	1.06554380102753
MMV_Model4	FCFP_6	SciTegic.value.IntegerFingerprintValue	G1972	-897363938	4	16696426	2	2	1.06554380102753
MMV_Model4	FCFP_6	SciTegic.value.IntegerFingerprintValue	G1973	-284918381	4	16696426	2	2	1.06554380102753
MMV_Model4	FCFP_6	SciTegic.value.IntegerFingerprintValue	G1974	1999089170	4	16696426	2	2	1.06554380102753
MMV_Model4	FCFP_6	SciTegic.value.IntegerFingerprintValue	G1975	125997344	45	16696426	3	3	1.06548708909045
MMV_Model4	FCFP_6	SciTegic.value.IntegerFingerprintValue	G1976	-673477265	45	16696426	3	3	1.06548708909045
MMV_Model4	FCFP_6	SciTegic.value.IntegerFingerprintValue	G1977	1446135095	45	16696426	3	3	1.06548708909045
MMV_Model4	FCFP_6	SciTegic.value.IntegerFingerprintValue	G1978	2065898223	86	16696426	4	4	1.06545306347194
MMV_Model4	FCFP_6	SciTegic.value.IntegerFingerprintValue	G1979	-966976352	209	16696426	7	7	1.06540202721484
MMV_Model4	FCFP_6	SciTegic.value.IntegerFingerprintValue	G1980	548390797	209	16696426	7	7	1.06540202721484
MMV_Model4	FCFP_6	SciTegic.value.IntegerFingerprintValue	G1981	-1564960689	209	16696426	7	7	1.06540202721484
MMV_Model4	FCFP_6	SciTegic.value.IntegerFingerprintValue	G1982	-1074103748	373	16696426	11	11	1.06537367486412
MMV_Model4	FCFP_6	SciTegic.value.IntegerFingerprintValue	G1983	-309153329	746	16696426	20	20	1.06071422115162
MMV_Model4	FCFP_6	SciTegic.value.IntegerFingerprintValue	G1984	-373663686	87	16696426	4	4	1.0605862131406
MMV_Model4	FCFP_6	SciTegic.value.IntegerFingerprintValue	G1985	-1478872429	46	16696426	3	3	1.05940701191771
MMV_Model4	FCFP_6	SciTegic.value.IntegerFingerprintValue	G1986	-1666004746	46	16696426	3	3	1.05940701191771
MMV_Model4	FCFP_6	SciTegic.value.IntegerFingerprintValue	G1987	-1303769626	46	16696426	3	3	1.05940701191771
MMV_Model4	FCFP_6	SciTegic.value.IntegerFingerprintValue	G1988	1922408172	46	16696426	3	3	1.05940701191771
MMV_Model4	FCFP_6	SciTegic.value.IntegerFingerprintValue	G1989	-668887629	5	16696426	2	2	1.05744476132738
MMV_Model4	FCFP_6	SciTegic.value.IntegerFingerprintValue	G1990	-1604460920	5	16696426	2	2	1.05744476132738
MMV_Model4	FCFP_6	SciTegic.value.IntegerFingerprintValue	G1991	-426501163	5	16696426	2	2	1.05744476132738
MMV_Model4	FCFP_6	SciTegic.value.IntegerFingerprintValue	G1992	-416291604	5	16696426	2	2	1.05744476132738
MMV_Model4	FCFP_6	SciTegic.value.IntegerFingerprintValue	G1993	1973160115	5	16696426	2	2	1.05744476132738
MMV_Model4	FCFP_6	SciTegic.value.IntegerFingerprintValue	G1994	1742580827	5	16696426	2	2	1.05744476132738
MMV_Model4	FCFP_6	SciTegic.value.IntegerFingerprintValue	G1995	-1505410725	5	16696426	2	2	1.05744476132738
MMV_Model4	FCFP_6	SciTegic.value.IntegerFingerprintValue	G1996	1789403781	5	16696426	2	2	1.05744476132738
MMV_Model4	FCFP_6	SciTegic.value.IntegerFingerprintValue	G1997	-576436529	5	16696426	2	2	1.05744476132738
MMV_Model4	FCFP_6	SciTegic.value.IntegerFingerprintValue	G1998	-1433974663	5	16696426	2	2	1.05744476132738
MMV_Model4	FCFP_6	SciTegic.value.IntegerFingerprintValue	G1999	920844212	5	16696426	2	2	1.05744476132738
[truncated: 49,685 more rows]
